# Supplementary material for: A Genome-Scale DNA Repair RNAi Screen Identifies SPG48 as a Novel Gene Associated with Hereditary Spastic Paraplegia
Source: PLoS Biol. 2010 Jun 29;8(6):e1000408. doi: 10.1371/journal.pbio.1000408 (PMC2893954; doi:10.1371/journal.pbio.1000408)
Supplement: Table S1 — Primary RNAi screening data. Red, esiRNAs that decreased the frequency of homologous recombination below an average z-score of −2. Green, esiRNAs that increased the frequency of homologous recombination above an average z-score of 2. n.a., not available. (3.90 MB XLS) [file pbio.1000408.s004.xls]

## Sheet: Supplementary Table 1
No.	ENSG	Associated Gene Name	EntrezGene ID	z-score replicate 1	z-score replicate 2	Average z-score	Forward Primer Sequence (5'-3') esiRNA	Reverse Primer Sequence (5'-3') esiRNA
1	ENSG00000012048	BRCA1	672	-5.575	-6.548	-6.0615	CTTCCCTGCTTCCAACACTT	CAACTCCCTGGCTTTCAGAC
2	ENSG00000127922	SHFM1	7979	-6.22	-5.367	-5.7935	GAGGAAGAGTGAGGGTTCCA	TAGTGTCCCATCCTGGGTTC
3	ENSG00000112761	WISP3	8838	n.a.	-5.734	-5.734	TACATTCAGCCTTGCGACAG	AACTTTTCCCCCATTTGCTT
4	ENSG00000115233	PSMD14, POH1	10213	-6.333	-4.978	-5.6555	ATGGGTTTGATGCTTGGAGA	ATGCCTGGATAGATGGCTTG
5	ENSG00000173692	PSMD1	5707	-5.815	-4.976	-5.3955	GCAACATACCTTCCCAAGGA	GAGCATCAGCCTCTTCCATC
6	ENSG00000051180	RAD51	5888	-5.267	-5.124	-5.1955	GCATAAATGCCAACGATGTG	CATCACTGCCAGAGAGACCA
7	ENSG00000165227	n.a.	n.a.	-5.141	-4.836	-4.9885	AGACGTGGCTGTGAACAGTG	CCCTGAACTTCTTCAGCACA
8	ENSG00000095139	ARCN1	372	-5.272	-4.46	-4.866	TTGTGGAAATGACCCGAACT	TGCTTTACGACGCATCTCAG
9	ENSG00000187545	PRAMEF10	343071	-4.159	-5.501	-4.83	CAGCCCTTGAAGGTGTTCAT	AGCTGACTGAGGCTTGGGTA
10	ENSG00000144488	ESPNL	339768	n.a.	-4.83	-4.83	GACATCTGCGGCTACATCAA	AACTGGTGACACTGGGGAAG
11	ENSG00000100138	NHP2L1	4809	-5.083	-4.125	-4.604	TGAGGCTGATGTGAATCCAA	TCAATGGACTGCTGAATGGA
12	ENSG00000102050	n.a.	n.a.	-1.61	-7.399	-4.5045	CCAATGGGCCTGCTACTAGA	TGACCTGGGTTGGAAGGTAG
13	ENSG00000163510	CWC22, KIAA1604	57703	-3.562	-5.354	-4.458	CGGTTTGCCATCAACTTCTT	TGGTCTCTGTCATTCGCAAC
14	ENSG00000174231	PRPF8	10594	-3.282	-4.719	-4.0005	AAGTTCCGCCATGACAAAAG	ACGGCTGGTGGTCATAGAAC
15	ENSG00000180210	F2	2147	-3.498	-4.459	-3.9785	CATTCACCCTGTGTGTCTGC	TTCCAGGAGCCCAGAATATG
16	ENSG00000144028	SNRNP200, ASCC3L1	23020.7	n.a.	-3.711	-3.711	GGAGGAAAGAAGAGCCAAGC	CCTCCCCGTATACGTCTTCA
17	ENSG00000184731	FAM110C	642273	-3.726	-3.692	-3.709	CAAGCCTGGTGAAGAAGCTC	GGCACCTGCTCTATCAGCTC
18	ENSG00000088325	TPX2	22974	-3.201	-3.945	-3.573	CCCACCAAAGAAGATGAGGA	CAAAGGGCTCCTGAGAGATG
19	ENSG00000198258	UBL5	59286	-3.545	n.a.	-3.545	AACTTCCGCTTCCGGTTC	GTTCATCCCATCGTGGATTT
20	ENSG00000165119	HNRNPK	3190	-3.171	-3.821	-3.496	GACCCAGAACGCTTCAGTTC	TCCACAGCATCAGATTCGAG
21	ENSG00000164976	KIAA1161	57462	-3.468	n.a.	-3.468	GCAGTTCCTTATTGGGGACA	GCAGATTGGTGTGAGTGTGG
22	ENSG00000159140	SON	6651	-4.238	-2.583	-3.4105	GCTGAGGAACACCTGAAAGG	CAAAGGCCCTTCAATGTCAG
23	ENSG00000167986	DDB1	1642	-2.865	-3.896	-3.3805	GCACCGTCACTCTCAAGGAT	GATCATCCACGAAACCCATC
24	ENSG00000150991	UBC	7316	-3.544	-3.18	-3.362	CTCAGAGGTGGGATGCAAAT	CGACCATCTTCCAGCTGTTT
25	ENSG00000135960	EDAR	10913	-3.489	-3.214	-3.3515	GCCCACAAAGAACTCTCAGG	ACTCCACACACGTTGGCATA
26	ENSG00000154767	XPC	7508	-3.479	-3.197	-3.338	CGTTTCAATAAAGGGGTCCA	TCTTTCCCTTTGCTGTTGCT
27	ENSG00000136870	ZNF189	7743	-2.632	-4.036	-3.334	AATGTGACGCTTGTGGTGAA	TTCCACTATCAGCTGCTCCA
28	ENSG00000101144	BMP7	655	-3.483	-3.118	-3.3005	AGGCTACGCCGCCTACTACT	CAAAAGCCATATGCTGCTCA
29	ENSG00000136715	SAP130	79595	-3.252	n.a.	-3.252	ACCCGAAGTGACAACAGACC	CCAACACCACTGCTGAAGTC
30	ENSG00000113712	CSNK1A1	1452	-4.194	-2.309	-3.2515	TTGGTGGAGAAATTGTGCAT	AAATTTCTGTGACAAATATGCTTTT
31	ENSG00000145425	RPS3A, RPS3AP47	6189,439992	-3.43	-3.011	-3.2205	GCATGGATCTTACCCGTGAC	CCAGTGGCTTTTCCAGAACT
32	ENSG00000138592	USP8	9101	-2.67	-3.738	-3.204	AAATTTGTTGGGGCATAAAGG	CATGAAGGCCTCAAATGTCC
33	ENSG00000115524	SF3B1	23451	-3.736	-2.583	-3.1595	TGTGGAGTTGGCAAACAAAG	ATGCTGCCCAATACTTCAGG
34	ENSG00000124357	NAGK	55577	-2.157	-3.988	-3.0725	GCAGATGGACTGAGCACAAA	CCCAGCAAACCTGCATTTAT
35	ENSG00000131668	BARX1	56033	n.a.	-3.025	-3.025	AAACGCTTCGAGAAGCAGAA	TTGGGTCTGTGTCCTTCCTC
36	ENSG00000138376	BARD1	580	-3.238	-2.777	-3.0075	TGCCTGAATGTTCTTCACCA	TTTTGATACCCGGTGGTGTT
37	ENSG00000125835	SNRPB	6628	-3.747	-2.123	-2.935	GAGTTCAGAAAGATCAAGCCAAA	CCATAGGTGGGGGAGGAC
38	ENSG00000069998	CECR5	27440	-2.974	-2.841	-2.9075	GATGTCCTCCTCAGCAATGG	ACGCCTGTACACACCAGGAT
39	ENSG00000165280	VCP	7415	-2.982	-2.82	-2.901	TGAAGCCATCAATGAGGACA	CCACTTTGAACTCCACAGCA
40	ENSG00000183168	n.a.	n.a.	-2.296	-3.496	-2.896	TCATCCACATCTTGCAGCTC	ACAGTGGACGATCCAGAAGG
41	ENSG00000073464	CLCN4	1183	-2.724	-3.056	-2.89	AGGACTTCCACACCATCGAC	AATACACGCACCAGGGAGAC
42	ENSG00000169045	HNRNPH1	3187	n.a.	-2.874	-2.874	GGGGCTCAAGGTATTCGTTT	CCTGTGCCCTATTCTTTCCTT
43	ENSG00000132341	RAN	5901	-4.251	-1.45	-2.8505	TGTTCCACACCAACAGAGGA	TCATACTGTGCTGCCAAAGC
44	ENSG00000163636	PSMD6	9861	-2.848	n.a.	-2.848	GGCAGCTGAACTCTTCCTTG	GAATTCCACACCAACACCAA
45	ENSG00000137812	CASC5	57082	-2.609	-3.085	-2.847	AGCGCAAGTTGAAAGCTG	TTGATTAGCCAATAGATTTCGTG
46	ENSG00000177679	AC005077.11	222183	-2.6	-3.082	-2.841	CGCAAGCGTCCTATTCCATA	AGAGGACACCCGTAGAAGCA
47	ENSG00000167744	NTF4	4909	-3.124	-2.529	-2.8265	TGTGTGCGATGCAGTCAGT	ATCCCTGAGGTCTCTCAGCA
48	ENSG00000178950	GAK	2580	-2.753	-2.894	-2.8235	AGGCCTAACTATGCCTCGAA	AGATCATCTTGGCGTGCTG
49	ENSG00000167088	AC106037.9-1	6632,100129492	-2.2	-3.392	-2.796	GGTCAGTGTTCGGTTGAAGG	TAGGACCCCCTCTTCCTCTG
50	ENSG00000124786	SLC35B3	51000	-3.126	-2.442	-2.784	AAGTCCTGTGGCTGGTACCTT	TGACGGCATCTGCACATAGT
51	ENSG00000100603	SNW1	22938	-2.293	-3.206	-2.7495	ATGATCCAGACCTGCAAAGG	TGTAGAGGGCTTCTGCCAAT
52	ENSG00000135414	GDF11	10220	-2.349	-3.138	-2.7435	CAGAGCATCGACTTCAAGCA	ATCTTGGTGGGGGTACAACA
53	ENSG00000166997	CNPY4	245812	-3.018	-2.375	-2.6965	ACGATGACACAGAACGCTTG	TCCTCCAACATGGTCTCACA
55	ENSG00000165724	ZMYND19	116225	n.a.	-2.696	-2.696	TGCAGATGGAAATGGTGCTA	CACTGTGCAGGGAGGGTAGT
54	ENSG00000137720	C11orf1	64776	-3.189	-2.203	-2.696	TGTTTCCTCACAAACCCACA	TCCTGAGTGATGCCCAATTT
56	ENSG00000161016	RPL8	6132	-3.237	-2.141	-2.689	TTGTGTATTGCGGCAAGAAG	GCAGCAATGAGACCCACTTT
57	ENSG00000145041	VPRBP	9730	-3.064	-2.308	-2.686	AACCCAGATCTTGCCAACAA	CGTTTCACATCAATGGTTGC
58	ENSG00000122707	RECK	8434	-2.399	-2.97	-2.6845	AAAGTGCCAGCCAGAGATGT	CCCTTGACGGACAATGAAAT
59	ENSG00000128228	SDF2L1	23753	-2.108	-3.256	-2.682	CTGTCCAACAACCAGGAGGT	TCACAAAGGCACTTGAGGAC
60	ENSG00000169606	FKSG30	440915	-2.391	-2.972	-2.6815	CGCAAAGACCTGTACACCAA	GACTGCTGTCACCTTCACCA
61	ENSG00000138623	SEMA7A	8482	-1.736	-3.602	-2.669	TCCCTGGTTCTGTTTGAAGG	TGTCACCGAGGGAATACACA
62	ENSG00000143006	DMRTB1	63948	-4.146	-1.155	-2.6505	CCACCACCTCCATCATCTTT	CTCTGGGGCTTGTTCCAATA
63	ENSG00000111247	RAD51AP1	10635	-2.658	-2.638	-2.648	AGCTGCCGTCAAATCAGAAT	GCTAGAGGTCATTTATAGGACATGG
64	ENSG00000142507	PSMB6	5694	-2.563	-2.7	-2.6315	CCTATTCACGACCGCATTTT	TGGGTATCTGGTCTCCCAAA
65	ENSG00000197728	RPS26P38	6231,441377,641768,644934,645979,646753,728937	-3.275	-1.988	-2.6315	TTCTTGAAGCCCGTCTCCTA	CAGCTCCTTACATGGGCTTT
66	ENSG00000100028	SNRPD3	6634	-2.315	-2.933	-2.624	GCATTTTGGGAAAGAGTGGA	CCACTTGGGCCTTGAGAATA
67	ENSG00000149418	ST14	6768	-2.507	-2.738	-2.6225	ACGTCCTGCTCATCACACTG	CATGGGTCACTGGAGTCGTA
68	ENSG00000127022	CANX	821	-0.973	-4.254	-2.6135	TGGGAAGATATTGGGAAGGA	CTGGAAAGGCAATGAACGAT
69	ENSG00000186019	ZNF224	7767	-3.216	-2.006	-2.611	GGCCTCGTGTCTTTTGAAAC	TGAGGCCTGACTAAAGCACA
70	ENSG00000105066	FLJ14768, FIZ1	84922	-1.59	-3.618	-2.604	CCACGAGTGCTACCTCAAGC	ACGGCTACCCACACTCATTC
71	ENSG00000177733	HNRPA0	10949	-1.925	-3.281	-2.603	ACTTTGAGGCCTTTGGGACT	ATCGGATGGAACTTGACCAC
72	ENSG00000157606	n.a.	n.a.	-1.795	-3.407	-2.601	AATGTCGTTGCCTGAAGTCC	AGGCAAGTTGGGAATTTGTG
73	ENSG00000146285	SCML4	256380	-0.541	-4.652	-2.5965	GGCAGAACTCTGGAGACAGC	ATTCACCTTTGGCTCTCGAA
74	ENSG00000160445	ZYG11BL, ZER1	10444	-2.359	-2.832	-2.5955	CAACTGCGAGATGTTCCTCA	CGGGTAGACAGACACGAGGT
75	ENSG00000105372	RPS19P3	6223,728953	-1.856	-3.327	-2.5915	GTGAACCAGCAGGAGTTCGT	AACCCAGCATGGTTTGTTCT
76	ENSG00000187244	BCAM	4059	-2.59	n.a.	-2.59	AACTTGACCCTGGAGGGAGT	GGCAGAGCAGATGAGTGTGA
77	ENSG00000188086	AC134504.2	377047	-2.926	-2.249	-2.5875	CGAGGAGGATTCCAGAATGA	GCTGGTGGGCTCAGTAAAGA
78	ENSG00000116035	VAX2	25806	-4.174	-1.001	-2.5875	CTTTGCCACCTCCAACATTC	ACTGCACTCACGCACACAA
79	ENSG00000171700	RGS19	10287	-3.03	-2.133	-2.5815	TGAGGCTGAGAAGCAGATCA	CTCGCCTTCTCGTCTACCAC
80	ENSG00000163961	RNF168	165918	n.a.	-2.563	-2.563	TATCTCGGCTTCTCCCTTGA	TCTGGTTTTAGGTCGCTCGT
81	ENSG00000101773	RBBP8	5932	-2.384	-2.738	-2.561	ACCCCCATGTCCGATACATA	GCTCCAAATACAGGAGATGACA
82	ENSG00000128915	NARG2	79664	n.a.	-2.56	-2.56	CGAGGTCACCAGCTTAATGG	TTTCTTTTGGGGAAGTGGTG
83	ENSG00000162694	EXTL2	2135	-1.921	-3.19	-2.5555	AGTCTAGGCAGCCACGTGTT	AGAGACCGGCACGAATTCTA
84	ENSG00000197561	ELANE	1991	-2.426	-2.682	-2.554	GCATCTTCGAAAACGGCTAC	TATTGTGCCAGATGCTGGAG
85	ENSG00000124487	n.a.	n.a.	-1.293	-3.81	-2.5515	GCCGATATTGGTCAGCAGAT	GAATCCTTGCCTGTTGCATT
86	ENSG00000197296	C20orf142	128486	-2.869	-2.219	-2.544	TCAGGTCACTCCTTCCTGCT	CTCACTCCCCAGACTTCAGC
87	ENSG00000187818	n.a.	n.a.	-1.919	-3.137	-2.528	AACTGAGCAACCCATGATCC	TGTTCTCCAGGCGAAGTTCT
88	ENSG00000100353	EIF3D	8664	-2.615	-2.433	-2.524	AGGAGATCGGCTAGGAAAGG	TCAATGTCCTGTGGCTCTGA
89	ENSG00000123416	TUBA1B	10376	-1.856	-3.171	-2.5135	ATGGCAAGAAGTCCAAGCTG	CTCAAAGCAAGCATTGGTGA
90	ENSG00000132704	FCRL2	79368	-1.813	-3.199	-2.506	GCTCAGCAAACATCAGGACA	CAAGTCCTGTTCTCATCACTTCA
91	ENSG00000016391	CHDH	55349	n.a.	-2.497	-2.497	AGGTGCCATCAACTCTCCAC	CTGGATCACAGGGTGGTCTT
92	ENSG00000099875	MKNK2	2872	-2.962	-2.031	-2.4965	AGCTGGCCTTCTCCCTAGAC	GTAGAAGCGGTCCTCCTCCT
95	ENSG00000170027	YWHAG	7532	-3.373	-1.615	-2.494	CTGAATGAGCCACTGTCGAA	GCGTGGAGTCCTTGTAGGAG
94	ENSG00000167987	VPS37C	55048	-1.718	-3.27	-2.494	GAAGGATGGAGACGCTGAAG	GCATCCTCATGGAGGAAAAA
93	ENSG00000179315	n.a.	n.a.	-3.735	-1.253	-2.494	AGCTGAGGAAGCTCATTGGA	AGAATAACCAGGGCCGAAGT
96	ENSG00000168754	FAM178B	51252	-1.695	-3.269	-2.482	CTGCACATGCCTGACTGC	CCATGAGGTTCTCATCAGTGT
97	ENSG00000134697	GNL2	29889	-2.371	-2.588	-2.4795	TACTAACCCGTTTGGCAAGG	TACCCACAGTCTGCAAGTCG
98	ENSG00000182704	TSKU, LRRC54	25987	-1.891	-3.061	-2.476	GCAGGAGCTGAGGTGTTTTC	GGGGAAGCAACGTAGACAAA
99	ENSG00000183684	THOC4	10189	-2.55	-2.357	-2.4535	GGAAACTGCTGGTGTCCAAT	TGGTGTCCATTCTCGCATTA
100	ENSG00000185737	NRG3	10718	-1.676	-3.221	-2.4485	AAGGCAGGTGCTGTCAATTT	TGGTCTGGGATCCTTGATTC
101	ENSG00000021762	OSBPL5	114879	-2.128	-2.754	-2.441	GGGAATCAAGAAGCCGTACA	CGAAGAAGGGCTTGAGTTTG
102	ENSG00000065057	NTHL1	4913	-3.087	-1.774	-2.4305	AAACCAAAGACCAGGTGACG	CCCACCAAGAGTCCATTGAT
103	ENSG00000101412	E2F1	1869	-2.766	-2.077	-2.4215	ACCCCTCTCCTCTGTCTCCA	AGAAGTGCTCTCACCGTCCT
104	ENSG00000118922	KLF12	11278	-0.386	-4.45	-2.418	GGGACTCTGTGTGAGGGAAA	CAGTTGGGGATGAGGCTAGA
105	ENSG00000184624	n.a.	n.a.	-1.927	-2.908	-2.4175	TTGTGGCAAAATTTTTAAGTGG	AGCCCCAAAGACTGCTTACA
106	ENSG00000099899	TRMT2A, HTF9C	27037	-2.517	-2.313	-2.415	TCTGCAGAGCCCCATCTAAC	AGCCTTGGCTAGTCCACAAA
107	ENSG00000154920	EME1	146956	-2.842	-1.986	-2.414	CACCCTCACTGGATTCTGGT	ACAGGTAGGCTGGAAGCTGA
108	ENSG00000076928	ARHGEF1	9138	-2.21	-2.594	-2.402	ACCTCATCTCCGAGGATGTC	CTCAGCCCCTTCTTGGTCTT
109	ENSG00000130305	NSUN5	55695	-2.584	-2.207	-2.3955	CAGCAACTTCCAGAACGTGA	CCCGACCCTGATAGGAGAA
110	ENSG00000106665	CYLN2	7461	-2.302	-2.469	-2.3855	ATGTCACCAAGGCCAAAGAC	CTGCGTGTACTTGGGTGTGT
111	ENSG00000196089	n.a.	n.a.	-2.188	-2.569	-2.3785	ACAATGGTCGTGCCAAAAAG	TCCAGAGAATAGCCTGTCTTCA
112	ENSG00000143369	ECM1	1893	-2.855	-1.893	-2.374	CCCTTTGAGGGACAGAGTCA	ACTCTAGGCGGTTTGTGTGG
113	ENSG00000171208	NETO2	81831	-3.022	-1.697	-2.3595	TTTGCTTCGCCAAATTATCC	TGGCCTGGTTTTGTTTTCTC
114	ENSG00000184004	n.a.	n.a.	-2.277	-2.438	-2.3575	GTAAAAGGGGCCATGAGTGA	ACACACACTCCAGAGGCTGA
115	ENSG00000176029	C11orf16	56673	-2.321	-2.373	-2.347	GCTGCACAAGTCTTTCACCA	GGGATCTGTGTTGACTGCAC
116	ENSG00000170959	DCDC5	n.a.	-2.899	-1.782	-2.3405	TATGCTCTGCTTGGCTTGTG	TTGGGGTTCCATCTTTGGTA
117	ENSG00000143321	HDGF	3068	-2.342	-2.319	-2.3305	ATGAAGGGCTACCCACACTG	TTCAACGCTCCTTTCTCGTT
118	ENSG00000152795	HNRPDL	9987	-1.826	-2.826	-2.326	GCTCCGTCACTATGGAGGAT	TCTCTCCAAAGGCTCCAAAA
119	ENSG00000157450	RNF111	54778	n.a.	-2.326	-2.326	CAGCTGTTCCCTCAGGAAGT	GCCTGCTCAGAGGTAGATGG
120	ENSG00000090061	CCNK	8812	-1.941	-2.71	-2.3255	AGTGGGTAAGCAGCAGGGTA	TGACAACAGCTTGGCTTCAG
121	ENSG00000130307	USHBP1	83878	-2.669	-1.978	-2.3235	CCTGAGTAGCCGAGAGGATG	GCCCTTGTATCCCTGTAGCA
122	ENSG00000176615	n.a.	n.a.	-2.096	-2.544	-2.32	AGTCATTCTGCCCATCAAGG	GGAGGGTAAGCTTTTGAGCA
123	ENSG00000099985	OSM	5008	-1.592	-3.033	-2.3125	CAAGGCCTGGATGTTCCTAA	ACTGAGTGCATGAAGCGATG
124	ENSG00000174667	OR7D4	125958	-2.679	-1.937	-2.308	TCCCCAAGATGCTAGTGAGC	TGGGTCACAGCAGAACTCAG
125	ENSG00000142634	EFHD2	79180	-2.726	-1.889	-2.3075	TCAACCCCTACACCGAGTTC	TAGTGGTCCCGTCAGACACA
126	ENSG00000164917	KIAA0415	9907	-1.7	-2.91	-2.305	CGCCTCATTGAGCAAAGTAA	AGAGGTTGGGGAAGCTCAAT
127	ENSG00000115966	ATF2	1386	-1.992	-2.617	-2.3045	TGAAGTGGCACAGCTGAAAC	TCTGCCTTGGAGGTTGAACT
128	ENSG00000136488	CSH1	1442	-1.823	-2.782	-2.3025	TCTGCCTGTCCTGGCTTC	CGTTTGGATGCCTTCCTCTA
129	ENSG00000108591	DRG2	1819	-2.186	-2.41	-2.298	GCTAAGCTCGCCAAGTATCG	CCACAGACTCCAGCTCCTTC
130	ENSG00000157551	KCNJ15	3772	-3.783	-0.812	-2.2975	GGTGCTTCGTCTGAAAGTGA	CAGCCCCATTTGTGTAGGTT
131	ENSG00000079277	MKNK1	8569	-2.811	-1.781	-2.296	TGACTTTGACTTGGGCAGTG	GGCGCTAAGTCTCTGCTTTG
132	ENSG00000153982	GDPD1	284161	-1.621	-2.967	-2.294	ACCTTGGCAAACTGGATGTC	GAATGCCTCGAGCAGTTAGG
133	ENSG00000075624	ACTB	60	-2.664	-1.924	-2.294	GTCCACCTTCCAGCAGATGT	ATGCTATCACCTCCCCTGTG
134	ENSG00000119698	PPP4R4	57718	-2.972	-1.612	-2.292	CATCAAAATTTGCCTGTGGA	CCACACATACATATGCATTCACAA
135	ENSG00000183837	PNMA3	29944	-2.588	-1.979	-2.2835	CCACCAGACTCCTGGAGAGA	AAAGCAGAGGTGGTGCTCAT
136	ENSG00000134644	PUM1	9698	-3.104	-1.462	-2.283	CTCATGGTGGATGTGTTTGG	TTCTCCACAACATTGCTTGC
137	ENSG00000146830	GIGYF1	64599	-1.952	-2.61	-2.281	TAGCGATCCTCAAGGAGGTG	CTGCCTCTTCCTGTGCTCTC
138	ENSG00000158516	CPA2	1358	-2.28	n.a.	-2.28	TGGATGCCCTGGATATCTTC	GCAGGCTTCTCAGAGATTGG
139	ENSG00000111647	UHRF1BP1L	23074	-1.992	-2.563	-2.2775	TGTAAATGCACACTGGGAACA	TTTGCGTTGTCTTCACTTGC
140	ENSG00000005194	CIAPIN1	57019	0.172	-4.715	-2.2715	CAAGTGGCTCACAACCTCCT	AACAAAGGGGTCTCTGCTCA
141	ENSG00000137384	TRIM15	n.a.	-2.289	-2.253	-2.271	GTCCCTGAAGGTGGTCCAT	TCTCTCCGTGCTCAGAGCTT
142	ENSG00000063176	SPHK2	56848	-1.902	-2.627	-2.2645	CAGACTCAGCGGCCTACTTC	CAGTCAGGGCGATCTAGGAG
143	ENSG00000171428	NAT1	9	-2.701	-1.82	-2.2605	CGATGTTGGGAGGGTATGTT	AAGCCCACCAAACAGTGAAC
144	ENSG00000110844	PRPF40B	25766	-2.187	-2.331	-2.259	CGGACACAGGCAAACCTTAT	TTGTCCCTCAGCAGTTCCTT
145	ENSG00000178209	PLEC1	5339.65	-2.063	-2.441	-2.252	TTCACCAAGTGGGTCAACAA	TGGATGATGGCATTGAAGAG
146	ENSG00000110711	AIP	9049	-4.315	-0.188	-2.2515	AGCTCCCGGACTTTCAAGAT	ATAAGTGGCACTGCCTTTGC
147	ENSG00000175216	CKAP5	9793	-2.328	-2.165	-2.2465	CAAGGAGCTGGGCATAGAGA	AGCATCTCCACCAGCAGACT
148	ENSG00000164733	CTSB	1508	-2.245	-2.239	-2.242	ACAGGGTCTGAAGGACTGGA	TGCTGAGCACAAGATCAGAGA
150	ENSG00000099783	HNRNPM	4670	-2.224	-2.227	-2.2255	GCTGGAAGACTTGGAAGCAC	AAGGCCCTCTCATCCATCTT
149	ENSG00000111973	n.a.	n.a.	-3.446	-1.005	-2.2255	ATCTTCCTCTGCGTGCTGTT	GGAAGCTAGTGGAGGAGGTG
151	ENSG00000160326	SLC2A6	11182	-2.169	-2.274	-2.2215	GGCAATTTCAGCTTTGGGTA	GAGTTGGGCATGAAGCTGAG
152	ENSG00000141497	ZMYND15	84225	-2.24	-2.192	-2.216	TGGGCATTGATCTGCTAGTG	CGGTGACTCACATCATCTGG
153	ENSG00000130332	LSM7	51690	-2.783	-1.644	-2.2135	GACAAGACGATCCGGGTAAA	AAGGAAAATGCTTCCGTTCC
154	ENSG00000175416	CLTB	1212	-3.016	-1.406	-2.211	GGCTGATGACTTTGGCTTCT	AGGTCCTTCTTGGCCTTCTC
155	ENSG00000100196	KDELR3	11015	-4.289	-0.111	-2.2	CCTGGACCTGTTCACCAACT	AGGTCCTCAGATTGGCATTG
156	ENSG00000148834	GSTO1	9446	-2.916	-1.481	-2.1985	GGACGCGTCTAGTCCTGAAG	GGGCCAGATGAGGTAATCAA
157	ENSG00000171365	CLCN5	1184	n.a.	-2.197	-2.197	ACGGAGCATTCTCCTCCATT	CCAGAGATTATGTAGTGCAACTGG
158	ENSG00000182217	HIST2H4B	8294,8359,8360,8361,8362,8363,8364,8365,8366,8367,8368,8370,121504,554313	n.a.	-2.177	-2.177	CAGTCACCTACACCGAGCAC	CCGACTGGTAAGCTTCTGGA
159	ENSG00000196933	RPS26P11	n.a.	-2.501	-1.852	-2.1765	GGAACAACAGTCATGCCAAA	TCCAGAGAATAGCCTGTCTTCA
160	ENSG00000135604	STX11	8676	-2.528	-1.812	-2.17	CGTACACGAGCTCTTCTTGC	TGCACAACTTTGTGGGAATC
161	ENSG00000196296	ATP2A1	487.1	-1.781	-2.558	-2.1695	TAAGAAGCTTGCCCTCCGTA	GGGAGAACTCCAGGGTGAAT
163	ENSG00000161217	PCYT1A	5130	-1.68	-2.658	-2.169	ACTCCTTGTGAGCGACCTGT	TCGGGTGATGATGTCTGATG
162	ENSG00000116691	MIIP	60672	-2.333	-2.005	-2.169	CGTCCTCAACTTCCTTGAGC	GGAAGAGCTGGTGTCCAGAG
164	ENSG00000197170	PSMD12	5718	-1.914	-2.423	-2.1685	TTTGGTTCACCGAATAAGTGG	TTTGGATCCTTGGGTCTCTG
165	ENSG00000164062	APEH	327	-2.166	n.a.	-2.166	CCCCATTCATCCTTTGTCAC	TGTATCTGATGGGCGATTTG
166	ENSG00000102595	UGCGL2	55757	-0.767	-3.564	-2.1655	TGATTCTCTATGCCGAAATGG	TCTGGCTTTTATGGGGAAGTT
167	ENSG00000198034	RPS4X	6191	-2.854	-1.47	-2.162	ACGGGAGAGAATTTCCGTCT	GCCCTTGCCAATAACAAAAA
168	ENSG00000108344	PSMD3	5709	-2.387	-1.933	-2.16	GTACGACCAGGCTGAGAAGC	CGGGAATAGGAGAGGCTGAT
169	ENSG00000105379	ETFB	2109	-0.594	-3.725	-2.1595	ACAGTGCCAGGAGACGATTC	CAGAGAGCTTGGAGGTCAGG
170	ENSG00000149257	SERPINH1	871	-1.581	-2.734	-2.1575	TGCTAGTCAACGCCATGTTC	CTTGTCAATGGCCTCAGTCA
171	ENSG00000108924	HLF	3131	-1.945	-2.357	-2.151	TCACCACGAAGACGCATTTA	GCTGTGGCTTCAGTTCTTCC
172	ENSG00000154930	ACSS1	84532	-1.72	-2.581	-2.1505	GCCAAGTGCAAGGTGGTTAT	AACTGGGGTGCTCTCAAAAA
173	ENSG00000170917	NUDT6	11162	-2.153	-2.14	-2.1465	CATCCTCCAAAGCCGATTTA	AACTTCTCGAACCGCTGTGT
174	ENSG00000189423	n.a.	n.a.	n.a.	-2.146	-2.146	AGCAGCCCAAAAGGTTCTC	TGTCTTCTCTTTGGTCATCAGTG
175	ENSG00000103710	RASL12	51285	-2.069	-2.216	-2.1425	TTTTCGAGGTCTCTGCCTGT	GAAAGGCTGGTGGTGAGAAG
176	ENSG00000156110	ADK	132	-1.156	-3.124	-2.14	GGGTACAAGGGTATGGTAATGC	TGTTTGAGTGCACATTAAAGAGATT
177	ENSG00000125691	RPL23	9349	-2.668	-1.607	-2.1375	CAAGATGTCGAAGCGAGGAC	TGGCAGAACCTTTCATCTCG
178	ENSG00000067560	RHOA	387	-1.83	-2.428	-2.129	CGGTCTGGTCTTCAGCTACC	TTCTGGGGTCCACTTTTCTG
180	ENSG00000100320	RBM9	23543	-2.798	-1.453	-2.1255	GCAAGATGAAGAGGAAAAACAAA	TGCCTGTCAAAGACCAGAAA
179	ENSG00000007255	TRAPPC6A	79090	-2.279	-1.972	-2.1255	TCTTGTGCAAAGACCTGTGG	TGATACCCACTTCCTGAGCA
181	ENSG00000182379	NXPH4	11247	-2.614	-1.635	-2.1245	GTATTTCCGCCACAACTCGT	GATGACTTTGAAGGGCTTGG
182	ENSG00000092199	HNRNPC	3183	-1.763	-2.484	-2.1235	CAATGGCGAGGATGACTCTT	GATTGCCTTTGCAGTTAGGG
183	ENSG00000134121	CHL1	10752	-2.478	-1.764	-2.121	CTGATGTGTGCGATTGCTCT	TGCAGGATGTTGACTTCTGG
184	ENSG00000119688	ABCD4	5826	-3.052	-1.189	-2.1205	AGGTCTACCCCGACTCAGGT	TCTTCGCTGTCAGTCCTCCT
185	ENSG00000141564	AC127496.5-1	57521	-2.139	-2.1	-2.1195	GGCCCTGCAGTTCATAGAAG	GCAGCAGGACTCTCCAAATC
186	ENSG00000134987	WDR36	134430	-2.524	-1.694	-2.109	CCGGACTGACATTTCTCCAT	TGAGAGGCCAATTACAGCAA
187	ENSG00000164051	CCDC51	79714	-2.032	-2.179	-2.1055	GTCATTCCAGGCAAGTCCAT	GCTGGTGAGCCACACAGATA
188	ENSG00000105877	DNAH11	8701	-2.485	-1.719	-2.102	TCCATTCCACTAACCGAAGG	TGCCAATTTTGTGTGAAGGA
189	ENSG00000174326	SLC16A11	162515	-1.903	-2.294	-2.0985	GCTTCGTCTTCTCGGCTTT	ACCAGGGCTGTGCCTAGAG
190	ENSG00000161681	SHANK1	50944	-2.23	-1.963	-2.0965	CGGAGGAAGCTCTACTCAGC	TTAAGCTTGGGGCATCAAAG
191	ENSG00000106588	PSMA2	5683	-2.083	-2.105	-2.094	TTTGGTGTACAGTGGCATGG	CAGCTTCATTGCAGATTCCA
192	ENSG00000100813	ACIN1	22985	-2.478	-1.707	-2.0925	TCCCCAGGTGTCAGTAGAGG	CTCGGCATAGTCAGCACAAA
193	ENSG00000138111	TMEM180	79847	-2.294	-1.89	-2.092	CATCGGAACTTCCTGTGGTT	GGTTATGAGGGACTGCTGGA
194	ENSG00000107581	EIF3S10	8661	-1.887	-2.295	-2.091	GGCATATTTGAAAATGGCAGA	AATGCATGGACTGGCTCTCT
195	ENSG00000189216	n.a.	n.a.	-1.271	-2.905	-2.088	AGGACACGTGGCTCTTCAGT	AAGGGACCGATGGAGAAGTT
196	ENSG00000126254	RBM42, MGC10433	79171	n.a.	-2.085	-2.085	GGGAAGCCAGAGAAATTGAA	CTGGCCACAGACCCTATCTC
197	ENSG00000159352	PSMD4	5710	-2.351	-1.816	-2.0835	GAAGGTGGCAAGATGGTGTT	TCTTGAGGCGTTTAGCCAGT
198	ENSG00000074590	NUAK1	9891	-2.74	-1.419	-2.0795	GCATCACCACAAGCACAACT	CGCCGCTCACTGATGTAAT
199	ENSG00000122133	PAEP	5047	-3.185	-0.973	-2.079	CCACATCACCTCACTGTTGC	CTGAAAGCCCTGATGAATCC
200	ENSG00000049167	ERCC8	1161	-1.025	-3.132	-2.0785	CAGGTGGTTCAGATGGTGTG	ACGTGGAGACCAGGAAACTG
201	ENSG00000161618	ALDH16A1	126133	-2.587	-1.567	-2.077	GCTTGGGCCACTATGTGAAT	GGCAAATCCTCCACATCATC
202	ENSG00000188163	FAM166A	401565	-1.9	-2.249	-2.0745	CATTTGGCCACATCAGACAG	GGATCCAAGCAAGACTCAGG
203	ENSG00000172935	MRGPRF	116535	-2.427	-1.717	-2.072	TGTTCTCCATCCTGAACACG	GACACCAGGAAGACGGAGAC
204	ENSG00000156885	COX6A2	1339	-1.666	-2.476	-2.071	CCAGAGAGGGGAGGTGAC	GCCTCAGGGGTGTTCGTAG
205	ENSG00000161381	PLXDC1	57125	-2.294	-1.842	-2.068	CGGGAACTGTGGGTAGATGT	ATGAAGGCATCCGATAGGC
206	ENSG00000181210	n.a.	n.a.	-1.362	-2.773	-2.0675	AGAACCTGTTCCTGGTGTCG	AGGATCATGATGAGGCAAGG
207	ENSG00000163521	GLB1L	79411	-1.782	-2.346	-2.064	AGTTGGGAGCCAGTGTGAAC	GGTGTTGGCTCAAAAATGGT
208	ENSG00000160957	RECQL4	9401	-2.898	-1.223	-2.0605	TACGGCTCAACATGAAGCAG	GTGGAGATGCCAGACAGGAT
209	ENSG00000100815	TRIP11	9321	-2.108	-2.008	-2.058	GTAACCCACGGAACTGAGGA	TATCTGGCCAGTGAGGGAAG
210	ENSG00000084774	CAD	790	-0.859	-3.247	-2.053	CATCCACACTGGTGAGTCCA	AGCCCACACAGTTCTCATCC
211	ENSG00000105755	ETHE1	23474	-1.798	-2.3	-2.049	CTGTGTCACCTTCGTCCTGA	TTTAGGGAGCTCCAGGGAAT
212	ENSG00000142549	IGLON5, XP_942084.1	402665	-2.305	-1.789	-2.047	AACCGCTCCAACATCCTGTA	CGTGATGGTCGGAGGATAGT
213	ENSG00000177381	n.a.	n.a.	-1.331	-2.762	-2.0465	GGAAACCTTGGCATGATTGT	AGAGTGGGGGAACATCACAG
214	ENSG00000169221	TBC1D10B	26000	-2.039	n.a.	-2.039	GACGGACAAGTATGGCTTCC	TGGTGTAGGCCTTCAGGATT
215	ENSG00000148985	AC090587.2	27315	-1.562	-2.495	-2.0285	GAGGTTCATGACCACCATCC	GTGCTGTTTCTGGAGCAGGT
216	ENSG00000116786	PLEKHM2	23207	-0.755	-3.296	-2.0255	TGTCGGTGAAGAAGTTGCAG	GGTCTAGGTAAGGGGCATCC
218	ENSG00000162460	TMEM82	388595	-2.241	-1.809	-2.025	CCTGAACAGCCTCCTGAAAG	GGTCAGGAAGTCCTGGTTGA
217	ENSG00000162598	C1orf87	127795	-2.589	-1.461	-2.025	CAATGCACCAGAAACCAATG	GATTGGGTCCAGGATCTTCA
219	ENSG00000171840	NINJ2	4815	-2.3	-1.745	-2.0225	CGACTCAACCAGCTCAACAA	CAGAAGGAAGCAGTGGGGTA
220	ENSG00000117616	C1orf63	57035	-2.485	-1.556	-2.0205	GGAAGTACAGGCGCTACTCG	CACCTATTCCACGGCTTGTT
221	ENSG00000009724	MASP2	10747	-1.679	-2.359	-2.019	GAAGTGGCCTGAACCTGTGT	AGTAGAAACCGCCCAGGTG
222	ENSG00000137154	RPS6	6194	n.a.	-2.016	-2.016	TCTGGGTGAAGAATGGAAGG	CTGCAGGACACGTGGAGTAA
223	ENSG00000115268	RPS15, RPS15P5	6209,440733,729789	-2.367	-1.658	-2.0125	CTTCCGCAAGTTCACCTACC	GGAGTCATGTGCGCCTTTAT
224	ENSG00000157856	C2orf39	92749	-1.533	-2.491	-2.012	AAAGCATTTGAGGTGGAACG	GCTCCTTGAATTGCATCACA
225	ENSG00000161905	ALOX15	246	-1.737	-2.287	-2.012	CTGCGATACACCCTGGAAAT	GGTGACAAAGTGGCAAACCT
227	ENSG00000154723	ATP5J	522	-1.404	-2.603	-2.0035	TTCGGGTCCAGGACTACAAC	ATGCTGATTCGGACAGGAAG
226	ENSG00000108309	RUNDC3A	10900	-1.586	-2.421	-2.0035	GTCAATCAATGGCCCTCACT	TCATGGAGCTCACAGTCTGG
228	ENSG00000106153	CHCHD2	51142,645317	-1.072	-2.93	-2.001	CATTACTGGGGGCTTCAGTG	TGCCCAGTCCCAGATTCTAC
229	ENSG00000168268	NT5DC2	64943	-1.448	-2.55	-1.999	GAGTGGCTTCTATGGCAAGG	GTGAAGAAGCTGGGCTTGTC
230	ENSG00000165996	PTPLA	9200	-2.566	-1.43	-1.998	CAGACATTTGCCTTGCTTGA	AAGCACCTTTCTTCTTTGACG
231	ENSG00000075568	TMEM131	23505	-2.38	-1.615	-1.9975	GGTCCAAGGACAAGGAACAA	AGGTCTGGGTAGGGCTTCTG
232	ENSG00000136425	CIB2	10518	-1.768	-2.223	-1.9955	AGCTGCATTCGCGATTCTAT	CATGTCCTCGAAGTCAGCAA
233	ENSG00000188549	C15orf52	388115	-2.162	-1.827	-1.9945	ACCAGGCTGAGCTGGAAGTA	GTGCACAGAGATGAGCGTGT
234	ENSG00000115457	IGFBP2	3485	-2.303	-1.675	-1.989	AAGCATGGCCTGTACAACCT	AAAGCAAGAAGGAGCAGGTG
235	ENSG00000082146	STRADB	55437	-1.88	-2.087	-1.9835	GCCTGTCCCATCTGCATAGT	CTTGCTGATGGCCTTTTCTC
236	ENSG00000163781	TOPBP1	11073	-1.984	-1.982	-1.983	CATTTAGCCAGTGTGCTGGA	ACCTGTCTGGCATGTTGTGA
237	ENSG00000188589	n.a.	n.a.	-2.292	-1.671	-1.9815	CTGATGCCAAACAAGCAGAA	TGGAGAACAGTTACGCAGGA
238	ENSG00000078668	VDAC3	7419	-1.168	-2.787	-1.9775	GGAAAGCATCAGGCAACCTA	ATTCAGTGCCATCGTTCACA
239	ENSG00000104381	GDAP1	54332	-1.272	-2.683	-1.9775	ACGCGGAGGTTAAGCTCATT	ATAAGCCGGGATCATGGAGT
240	ENSG00000112640	PPP2R5D	5528	-1.765	-2.187	-1.976	CAGCTGGCATACTGTGTGGT	CCTTCTGCTTCTCTGCCTTG
241	ENSG00000181649	PHLDA2	7262	-2.29	-1.66	-1.975	GCTTCCACTCCATCCTCAAG	GCAAACTGGCCAAGTGATTT
242	ENSG00000130173	AC011472.7-1	55908	-2.356	-1.591	-1.9735	TGCCTACCGAGAATTTGAGG	AGATGCCACGACTCTGCTTT
243	ENSG00000137266	SLC22A23	63027	-2.23	-1.712	-1.971	TCCAAGTGGGATCTTGTGTG	TAGAGCAGCATGAGCAGGAA
244	ENSG00000173898	SPTBN2	6712	-3.725	-0.216	-1.9705	CCTCAAGGAGCAGAAAGTGC	TGGTCCACATTCACGTCTTC
245	ENSG00000156009	MAGEA8	4107	-2.903	-1.033	-1.968	AAGCTCAGGAAGCTGCTCAC	CTCCAAATCGCCCAATAGAA
246	ENSG00000010310	GIPR	2696	-1.453	-2.481	-1.967	GAGTTTGTTCAGGCGGCTAC	CAAATGGCCTTGACTTCGTT
247	ENSG00000179558	n.a.	n.a.	-1.16	-2.765	-1.9625	AAAATGTTGGTGGATGATGTTG	TCAGCATACTCTCTATCTGACTTCTC
249	ENSG00000135119	RNFT2	84900	-1.7	-2.223	-1.9615	GGGGACGTGTTCATCCAG	GATCCACAAGATGACCAGCA
248	ENSG00000136457	CHAD	1101	-2.185	-1.738	-1.9615	ACCTGGACCACAACAAGGTC	AAGCGGTTGTTCTCCAAATG
250	ENSG00000115461	IGFBP5	3488	-1.961	n.a.	-1.961	AGTGTGGGCTTTTTCCCTTT	CAGGTCCCAGTTGCAAGAAT
251	ENSG00000083123	BCKDHB	594	-1.075	-2.844	-1.9595	ATACCCAGAAGCCCTTTCCA	TGTGAGGAAATGGTGTGTCA
252	ENSG00000133619	KRBA1	84626	-2.499	-1.414	-1.9565	TCCACATCTGCTCGTTCTTG	CTTAGACCAGGGGGCTGAGT
254	ENSG00000168501	n.a.	n.a.	-2.105	-1.799	-1.952	GTCGGATTCATTCCCTGAAC	ATGAGGCACAAGGAATCCAG
253	ENSG00000154429	C1orf96	126731	-2.498	-1.406	-1.952	GACTGACAAATCACCCACCA	TGTCCACGCAAGTGTTTCTT
255	ENSG00000137872	SEMA6D	80031	-0.88	-3.021	-1.9505	CTGAATCTGTGCATTTTGTGC	AAGTGTGTGGTGTGCAGCAT
256	ENSG00000136153	LMO7	4008	-2.545	-1.349	-1.947	TGAATCTGGAGAAGGGGAAA	GAAGGCTTTCGGAGAAATCA
257	ENSG00000106086	PLEKHA8	84725	-2.209	-1.682	-1.9455	TGCTCAAGTCCAGCAAGATG	GAATGCTTCTGTGGGAATGC
258	ENSG00000136718	IMP4	92856	-0.918	-2.963	-1.9405	CCCTGGAGTTTGATGATGCT	ATGGTGCCGGAATGATATGT
259	ENSG00000105202	FBL	2091	-1.478	-2.385	-1.9315	CGGGGGCTAAGGTTCTCTAC	AATCCTGACAGCGCTGAACT
260	ENSG00000125841	NRSN2	80023	-1.606	-2.25	-1.928	AGTGGCCAGTCATGGTTCTC	CCACCCCTTCATCTGTGTCT
261	ENSG00000158623	COPG2	n.a.	-2.286	-1.568	-1.927	TTTACAGGAGGCTCGTATATTCAATG	CAGTGCTGAACTGGATACACTGG
262	ENSG00000142290	n.a.	n.a.	-2.555	-1.29	-1.9225	CGTCATCAGCAAGAAGGTGA	GATCTTCGGGGATGAGACAA
263	ENSG00000106012	IQCE	23288	-2.077	-1.765	-1.921	TTCAGAGTGAAGAGGCCACA	GAACTTGCCAAGAGGGTCTG
264	ENSG00000110680	CALCA	796	-2.443	-1.397	-1.92	GCATGTGGTTTGGTTCCTCT	GCACATTCAGAAGCAGGACA
265	ENSG00000180697	C3orf22	152065	-3.021	-0.817	-1.919	GTCCTGCAGCTTGTCCTTTC	GTTCCCAAAGGTTGCACAGT
266	ENSG00000177553	n.a.	n.a.	-1.691	-2.14	-1.9155	AGTAGCCCAAGACCCTGGAG	CAAGCTGTCCCCTCTGTCAT
267	ENSG00000113657	DPYSL3	1809	-2.399	-1.431	-1.915	CCAAGGCAAGAAGAACATCC	ACATGCAGGGCATAGTCACA
268	ENSG00000112306	RPS12	6206.39	-1.567	-2.26	-1.9135	TTGCTGCTGGAGGTGTAATG	AATGACATCCTTGGCCTGAG
269	ENSG00000165271	NOL6	65083	-2.287	-1.537	-1.912	GCTGCTGTCAACCATTCTGA	CTGCTGTCCAGCAACATCAT
270	ENSG00000135624	CCT7	10574	-2.664	-1.158	-1.911	GCAGGTGAAACCCTATGTGG	CGACATTCAAAAGGGCAATC
271	ENSG00000107929	LARP5	23185	-2.365	-1.454	-1.9095	GCGAGACAGGAGGAAATGAG	CCTGTTGTGCATCAGCTTCT
272	ENSG00000103555	n.a.	n.a.	-1.723	-2.088	-1.9055	AAGTTGAGTGAGAGGAGTTGAGG	CTGCTTTAATTGTTTTAACTGCTTT
273	ENSG00000122741	WDR32	79269	-2.258	-1.55	-1.904	GGGTGGAAGAGGAATCAAGA	CCCTAATGTTTGAGAACCAGTG
274	ENSG00000188838	n.a.	n.a.	-2.092	-1.708	-1.9	TTCTGGAAGGAGCACCACTT	CAGCACCCTGGGAGATTTTA
275	ENSG00000101745	ANKRD12	23253	-2.392	-1.407	-1.8995	TGTAGCATGCCTTCTGTCATTT	CAGGTATGTTAGAATTTGGGCAGA
276	ENSG00000186825	C2orf27B	408029	-1.728	-2.069	-1.8985	GGGTTCACTGCTCCATTGAT	CTGGTCTCTGCCTCCATAGC
278	ENSG00000178605	GTPBP6	8225	-2.373	-1.423	-1.898	GTTCAGGAGGTGGACGTGAT	ATGGGAAACGAGACCATCTG
277	ENSG00000107140	TESK1	7016	-1.718	-2.078	-1.898	AGGCTGATGTCTTTGCCTTC	CCGTAGTGAGAAGGGGTTGA
279	ENSG00000072803	FBXW11	23291	-1.791	-2.001	-1.896	AGAAGTTCCCCTCGTTCCTT	AACAATTGCATGAAGCCAGA
280	ENSG00000167600	CYP2S1	29785	-2.353	-1.433	-1.893	AACCCAGGCACAGAATTCAC	CGGTCTGGGTTGAACTCTTC
281	ENSG00000151006	AC135050.5	339105	-1.696	-2.078	-1.887	GCCAGCCTGAGTTAGGAGTG	GGAGAGCTAACCTGCCTGTG
283	ENSG00000115649	C2orf24	27013	-1.578	-2.19	-1.884	CTATTCGCCGACTCCAGAAG	CAGGCAAGACAGCTTTACCA
282	ENSG00000176723	ZNF843	283933	-0.752	-3.015	-1.8835	CCGAGAGCCTCAAGAAACAC	GACAAGGTCTCTCGCCAGTC
284	ENSG00000176971	FIBIN	387758	-1.772	-1.993	-1.8825	CGATGGGGACTATGAGGAGA	GCTCGTATTTGTCCCTGAGC
286	ENSG00000087157	PGS1	9489	-1.852	-1.913	-1.8825	CAGACAGGAATGGCCTTGAT	TGACTTCCTGCCACTGACAT
285	ENSG00000186566	GPATCH8	23131	-1.567	-2.198	-1.8825	CAGATCCCATTCCAATCGTT	CAGGTGCACATTCAGCTTGT
287	ENSG00000135913	USP37	57695	-2.388	-1.373	-1.8805	TGAGGTTCAGCACTCCATCA	TGCAGGAATTCACCATTTGA
288	ENSG00000005379	BZRAP1	9256	-1.905	-1.854	-1.8795	ACACTGGCTTACCAGCACCT	AGCTTTCAGGTCAGCAGAGG
289	ENSG00000163684	RPP14	11102	-1.048	-2.71	-1.879	GCTTATTTCGGCTGTGAAGG	CACTGGCAGGTTCAGACAGA
290	ENSG00000128534	LSM8	51691	-2.675	-1.076	-1.8755	CGTCCGCTTTGGAGAACTAC	CAAAATGCCCATTATATTTTCACA
291	ENSG00000156858	PRR14	78994	-1.944	-1.806	-1.875	GTCTTCCCTCTCGGAGGAGT	AGCTTCCTTGAGCTGGTGAA
292	ENSG00000119919	NKX2-3	159296	-0.891	-2.858	-1.8745	GTCTGTCAAAAGCCCGACTC	GGGCTCCTCTTCATGTTCCT
294	ENSG00000172061	LRRC15	131578	-1.92	-1.828	-1.874	TAACCAGCCCTGTGGAAGAC	GGCACGACCTGCTTCTCTAC
293	ENSG00000106123	EPHB6	2051	-1.613	-2.135	-1.874	TGCTGGTGAATAGCCACTTG	GGGTGAGTCCAGACAAGGAA
296	ENSG00000103479	RBL2	5934	-2.228	-1.518	-1.873	GATGCTGAGGAGGAAATTGG	ATCTCCGCAAAACGAAAATG
297	ENSG00000162496	DHRS3	9249	-1.873	n.a.	-1.873	CATGGGAAGAGCCTAATGGA	CGCCCTTTGAAAGTGTTCAT
295	ENSG00000177595	LRDD	55367	-1.732	-2.014	-1.873	CTCGCACCTGAAGAATGTGA	ATCCAGATCATCCCGGAACT
298	ENSG00000124449	IRGC	56269	n.a.	-1.871	-1.871	CTTTGGTCTGGACGACGACT	AGCTTCCTGCAGGTTGAGAG
299	ENSG00000198366	HIST1H3A	n.a.	-1.939	-1.803	-1.871	AAGCAAACTGCTCGGAAGTC	GCTTGGACCGTCAGAGAGAC
300	ENSG00000151117	TMEM86A	144110	-1.879	-1.852	-1.8655	CATCGCCCTCAACAAATTCT	CAAGAAGCTGAGCACCATCA
301	ENSG00000139835	GRTP1	79774	-1.76	-1.97	-1.865	CATAACCAGGGAGTGGGCTA	TGGCTTCCAAAATCAACTCC
302	ENSG00000125731	SH2D3A	10045	-1.962	-1.766	-1.864	TCTGTTCCCAAGAGCTCCAT	AGGCTGACTGTTGCTCCACT
303	ENSG00000142657	PGD	5226	-1.468	-2.253	-1.8605	AAGTTCCAAGACACCGATGG	GGTTTCGATCAAATGCATCC
305	ENSG00000169504	CLIC4	25932	-2.261	-1.459	-1.86	CCCAGAGGCTCTTCATGATT	TCATTTCATTGCCATCCAGA
304	ENSG00000184363	PKP3	11187	-0.723	-2.997	-1.86	CTGTGCTCAACAACCTGGTG	TATAAGACCCTGCCCCTCCT
306	ENSG00000183169	LL22NC03-31F3.9	n.a.	-1.898	-1.82	-1.859	GTCCCCAGACTTGTGTCCAG	CTCGGATGTGGAGGAGTCAT
308	ENSG00000140398	NEIL1	79661	-1.825	-1.888	-1.8565	GCCCTATGTTTCGTGGACAT	AAAGGCAGCAAAGTCCTCCT
307	ENSG00000015676	NUDCD3	23386	n.a.	-1.856	-1.856	GCTTCCTCTACCGCAAGACA	TCGGGATTTTTCTGGAACTG
309	ENSG00000168806	LCMT2	9836	-2.284	-1.421	-1.8525	CCGAAAGGATGATTCCACTT	CCAGATCCCTCCAACCAGTA
310	ENSG00000087087	SRRT	51593	-1.066	-2.637	-1.8515	GCAGAGATTGACCTGGGTGT	GCATCTTGACAATGGCATCA
311	ENSG00000184416	n.a.	n.a.	-2.43	-1.273	-1.8515	CTTTTCGCTGGGAAGGGTAT	CCGAGAGCGTGTCCATGAT
312	ENSG00000181467	RAP2B	5912	-1.626	-2.077	-1.8515	GGAAGGGGAAGAGAAGTCCA	TACCGAGGCTTTGTTTTTGG
313	ENSG00000118816	CCNI	10983	-2.055	-1.644	-1.8495	GCTGGCCAAACTCAAGTACC	TTGCAGGCCATACAGTGAAG
314	ENSG00000127399	LRRC61	65999	-1.93	-1.766	-1.848	CCTGGAGTCCATCCTGCTAC	TCACCGTCGATGACTTTCAG
315	ENSG00000179751	SYCN	342898	0.142	-3.836	-1.847	GCGCCAAGCTCTATGACAAG	GCAGTAGAGCGCGGAGATAG
316	ENSG00000144231	POLR2D	5433	-2.47	-1.221	-1.8455	ACGCCTCACAGCTCATCTTT	GCAGCAGTGATGTTTGGAGA
317	ENSG00000136169	SETDB2	83852	-2.491	-1.199	-1.845	AAACTCCACCAAGGAGCAGA	ACAGTCCCAGCTTCATAGCC
318	ENSG00000184836	n.a.	n.a.	-1.213	-2.47	-1.8415	CAGAGAGCGGATGTTTGTGA	TGACAATGCCAGCTCAGAAC
319	ENSG00000064205	WISP2	8839	-0.869	-2.81	-1.8395	TTTCTGGCCTTGTCTCTTCC	CTTGCACCTCTGCCATACCT
320	ENSG00000125743	SNRPD2	6633,119358	-2.285	-1.391	-1.838	GGAGTGAACGGAGAGCGTAG	AATGGCAGCGGTCTTCATAG
321	ENSG00000183196	CHST6	4166	-2.209	-1.466	-1.8375	AGCCTTCAAGACTTCGTCCA	TCCATGAAGAGTGCACCTGA
322	ENSG00000145920	CPLX2	10814	-2.175	-1.498	-1.8365	GAATTCAGCACGCACACAAC	CTGGGATGGTGTCTCGACTT
323	ENSG00000196782	MAML3	55534	-1.814	-1.856	-1.835	CCCTTATAGCACCACGCCTA	TAGCATCCACGACTGACTGG
324	ENSG00000167578	RAB4B	53916	-1.611	-2.055	-1.833	CATCGTGGTCATCCTCTGTG	GTTCAGGGGGACAGACGTTA
325	ENSG00000167994	RAB3IL1	5866	-1.191	-2.472	-1.8315	CTGGACTTCACAATGCAGGA	GGTGGGTGTTTGCTCTGTCT
326	ENSG00000093222	n.a.	n.a.	-1.83	n.a.	-1.83	GTGAAGATCCTTTGCCACCT	TGCAGTGCTAGTTCTGGGAGT
327	ENSG00000170270	C14orf142	84520	-1.512	-2.147	-1.8295	CCCAGATGAAGGACATGGTAA	TTTTCCTTCCAGGGTCTGAA
328	ENSG00000188223	LIN37	55957	-1.414	-2.244	-1.829	CGCAAACGTCCATAACTGAA	GTGTAGGCTGGGACAAGGAA
329	ENSG00000175567	UCP2	7351	-1.367	-2.289	-1.828	CGTCTCCCACCCATTTTCTA	AGAATCATACAGGCCGATGC
330	ENSG00000086506	HBQ1	3049	-2.088	-1.563	-1.8255	AAAGGACCTTCCTGGCTTTC	CCTGGGAGAGGCTTTACTCA
332	ENSG00000125843	C20orf29	55317	-1.423	-2.227	-1.825	GAACCTGCTACTGGCTGAGG	GAAGGTGGGTTCAAGGACAA
331	ENSG00000147669	POLR2K	5440	-2.159	-1.491	-1.825	CTAGCCGGGTTGTATTTGGA	GGGGCCTTGGAATGTATCTC
333	ENSG00000184990	SIVA1	10572	-1.582	-2.067	-1.8245	GTCGTTCACCTGCCAGAGTC	GTCGACCCCACAGTTCAGT
334	ENSG00000172663	TMEM134	80194	-2.545	-1.103	-1.824	ATTCCAGCCGAACTTCCATC	CCGAACTTCCTGAGCAAACT
335	ENSG00000171604	CXXC5	51523	-1.85	-1.795	-1.8225	GACATTTCCACCTGGACACC	ACCACTGCTGCCAAAAGAAG
336	ENSG00000183403	DND1	373863	n.a.	-1.822	-1.822	TCACCAAGTGTTTGGGCATA	AGATCACTGGGTCAGGTTGG
337	ENSG00000143632	ACTA1	58	-2.075	-1.566	-1.8205	AGACACAATGTGCGACGAAG	GGCACGTTGAAGGTCTCAAA
338	ENSG00000124608	AARS2	57505	-1.996	-1.643	-1.8195	AGCTGGAGGACACCATAACG	TGAAGACCAGGTTCCAAAGC
339	ENSG00000196126	HLA-DRB1	3123	-1.719	-1.901	-1.81	AGGCAGCATTGAAGTCAGGT	GCAACCAGGTCCTGAGAAAG
340	ENSG00000156427	FGF18	8817	-1.725	-1.894	-1.8095	CCTGCACTTGCCTGTGTTTA	CAGGGCCGTGTAGTTGTTCT
341	ENSG00000185485	n.a.	n.a.	-1.721	-1.889	-1.805	TTTGATGCAGTGGTGGTAGG	CGCAGAGACCTCCCGTATAA
342	ENSG00000171813	PWWP2B	170394	-1.354	-2.255	-1.8045	GGACATCGTCTGGGGTAAGA	AAATACACTCAGCGGGAGGA
343	ENSG00000161179	YDJC	150223	-1.874	-1.732	-1.803	CGACGCTTTCTCTTGCTCTT	TGGTGAAGGTGTTTGCATTG
344	ENSG00000160703	NLRX1	79671	-1.972	-1.632	-1.802	GGCGGTGTCAGAATACTGGT	AGGCATGTTCCATCTCCAAG
345	ENSG00000140990	NDUFB10	4716	-2.129	-1.474	-1.8015	GCCAGAACCATTGCAAATCT	TCATACAGAGCCACACAGCA
346	ENSG00000150867	PIP5K2A	5305	-1.495	-2.106	-1.8005	TAAGGAATACTGCCCGATGG	GGCAGTTCTTTGGCCTTTTC
347	ENSG00000178802	MPI	4351	-1.083	-2.515	-1.799	GTGCCTGCTGTCTGCTGTAA	CCTTTCCCTTTCCTCCTCTG
348	ENSG00000133661	SFTPD	6441	-1.002	-2.594	-1.798	GTTGAGGCCTTACAGGGACA	AGGATATTGGCAGCATGAGG
349	ENSG00000197802	n.a.	n.a.	-2.141	-1.453	-1.797	GGCCTTTCCCTTCTAAGGTC	CCCAAGCATACCCTGTAGGA
350	ENSG00000062096	ARSF	416	-1.716	-1.878	-1.797	CAACACTTGCAGCCTTGCTA	CCATAATGGATCCAGCTCGT
351	ENSG00000087365	SF3B2	10992	-1.85	-1.742	-1.796	AGATTGATCGGACCCCTTG	GTCATGGCCATAGGATCCAG
352	ENSG00000100505	TRIM9	114088	-4.459	0.867	-1.796	GTCAGACAGGGCCAAAGAAG	GAGGGCTGTTGTCCAGACTC
353	ENSG00000188093	n.a.	n.a.	-2.081	-1.51	-1.7955	GGATATTGGGAGCTCTGCTG	CCGGATGAGGGTTTGTGTA
354	ENSG00000179715	FAM113B	91523	-2.244	-1.346	-1.795	TCCAGGTATGGTCCGAACTC	GTTGGCTTTGACCACTTCGT
355	ENSG00000146670	CDCA5	113130	-1.68	-1.909	-1.7945	ATCTTGAAAACGGAGCTGGA	CTCTCACCTCAACCCTCAGC
356	ENSG00000008283	CYB561	1534	-1.096	-2.49	-1.793	TTCTCCTTTCTCCGCTGCTA	AGCCATCCTAGGGCTAAAGG
357	ENSG00000150455	TIRAP	114609	-1.231	-2.346	-1.7885	CCAGCCTTTCACAGGAGAAG	TGAACCAGTCAGCCATCTTG
358	ENSG00000146834	MEPCE	56257	-1.689	-1.887	-1.788	CTGGGGGAAGAGGAAAGTGT	AGGGCAAAGGGAAGGATTT
359	ENSG00000075651	PLD1	5337	-2.178	-1.396	-1.787	CATGGCACCAACTTTCTCAA	TTCCATAGGCCAGGTCAATC
360	ENSG00000049239	H6PD	9563	-2.281	-1.288	-1.7845	TAATCCTGCTGGGAGCAACT	AGAAGTGGTCATGGCCAAAG
361	ENSG00000118046	STK11	6794	-1.778	-1.79	-1.784	GAGGAGGTTACGGCACAAAA	CCTTCCCGATGTTCTCAAAC
362	ENSG00000179523	AC009996.7	645212	-1.678	-1.889	-1.7835	GCTGTCCCTCTGGTCACTGT	TGCTTTTTGTGGCAGTCATC
363	ENSG00000185127	C6orf120	387263	-1.069	-2.492	-1.7805	GAACCACGAGGGCAAGATAG	GCAAACTGCAATCAGCTTCA
364	ENSG00000171848	RRM2	6241	-2.151	-1.406	-1.7785	CTGTGATTTTGCTTGCCTGA	TTCATGGTGTGGCTAGTTGG
365	ENSG00000183324	C15orf60	283677	-2.197	-1.359	-1.778	TAAGACGCGTGGATTGTCTG	AAACGTAGGAAGGGGCCTAA
367	ENSG00000070526	ST6GALNAC1	55808	-1.353	-2.201	-1.777	CCAGGACGGTGTCAGAGAAG	AAGGGTGGTGCAAAGTGTTC
366	ENSG00000174015	SPERT	220082	-1.549	-2.005	-1.777	GAAACCATGAGCCCTGAAAA	TGGAACACGAACATCTCGTC
368	ENSG00000179598	PLD6	201164	-1.437	-2.111	-1.774	AAGCCATCCAGAACAACAGG	AGGTCTGGCCCGAAATAACT
370	ENSG00000133315	MACROD1	28992	-1.836	-1.709	-1.7725	GACTGGAAGGAGGCGAAATC	CCCACTGTGTGGATGACGTA
369	ENSG00000048140	TSPAN17	26262	-3.15	-0.394	-1.772	ACCAGCATTTCCAGGAACC	AGCCTTTGGTGTGGATGAAG
371	ENSG00000116701	NCF2	4688	-2.315	-1.228	-1.7715	TTACTTCCAACGAGGGATGC	TCTTGATCCACCACAGATGC
372	ENSG00000160570	DEDD2	162989	-1.543	-1.996	-1.7695	TATGGCACCTCCAGCTCTTC	TGATGTCACAAACCACAGAGC
373	ENSG00000131910	NR0B2	8431	n.a.	-1.768	-1.768	AGGGACCATCCTCTTCAACC	GTCCAAACCAAGGAAGTCCA
374	ENSG00000113749	HRH2	3274	-1.796	-1.739	-1.7675	TACCAGCTGTCCTGCAAGTG	GATTGATCCTCTTGGCCTGA
375	ENSG00000126903	SLC10A3	8273	-1.404	-2.128	-1.766	TCTCACCTGCTGAAGACACG	CCGAAGACAGAGGCAAGAAG
377	ENSG00000143512	HHIPL2	79802	-1.728	-1.803	-1.7655	CAAAGGAAGGGTTTGCATGT	ACTGTCTTGGCGAGTGGTCT
376	ENSG00000100823	APEX1	328	-2.264	-1.267	-1.7655	CCCCAGATCAGAAAACCTCA	GAGGTCTCCACACAGCACAA
378	ENSG00000153187	HNRNPU	3192	-2.207	-1.322	-1.7645	AGCAGAGCCAAATCTCCTCA	AGAGAACATGCGGGAACAGT
379	ENSG00000162086	ZNF75A	7627	-1.394	-2.133	-1.7635	GCAGTGCTCTTGGGAGAAAC	CACTTTAGGTTTGGGGAGCA
380	ENSG00000171596	NMUR1	10316	-1.4	-2.125	-1.7625	CCCGTGCTCTATAGCCTCAT	TTCAGAAACTGGCAGTGGTG
381	ENSG00000174963	ZIC4	84107	-1.814	-1.709	-1.7615	CGGCTTTACCGAAACACTCT	ATTTGGCTTTGAAGGGCTTT
382	ENSG00000105509	HAS1	3036	-1.441	-2.08	-1.7605	ACTCGGACACAAGGTTGGAC	TGTACAGCCACTCACGGAAG
384	ENSG00000139343	SNRPF	6636	-1.05	-2.469	-1.7595	CCTGCGGTACCTGCTGTAGT	TCCCCCACAAAAGATGCTAT
383	ENSG00000164548	TRA2A	29896	-1.32	-2.199	-1.7595	ATCCAGATCCCAACACTTGC	TGCAACCATTCCGTTATCAA
385	ENSG00000172399	MYOZ2	51778	-1.993	-1.524	-1.7585	GAATGGGAAAGTGGATGGAA	CCAGAAAGGGGATTGACAAA
386	ENSG00000130520	LSM4	25804	-0.222	-3.291	-1.7565	CTGCGACAACTGGATGAACA	AGGGTCACAAAACACGAAGG
387	ENSG00000140497	SCAMP2	10066	-1.606	-1.905	-1.7555	GCAGGAAGAACTGGACAGGA	CAGTGTAGACAGGGCTGCAA
388	ENSG00000138658	C4orf21	55345	-1.755	n.a.	-1.755	TGTGGCAAGATGGAATTCTG	TGCTGCAGAATGGAGAAAAA
389	ENSG00000185504	C17orf70	80233	-1.687	-1.821	-1.754	AAGTGGAAAGCTCCTCTCTGG	TCATGAGCGTTCTGCTCCTA
390	ENSG00000169727	GPS1	2873	-2.049	-1.456	-1.7525	TGTCATCAAGGTCAGCGTCT	TCATCTCGTCCAGCATCTTG
391	ENSG00000121774	KHDRBS1	10657	-1.473	-2.031	-1.752	CCCAAATATGCCCACTTGAA	GGAGGTGGAGGCAAAGGTAT
392	ENSG00000133561	GIMAP6	474344	-2.105	-1.398	-1.7515	GGACTGTCCCAGATCCAGAA	TCCAATGCAGTCAAAAGCTG
393	ENSG00000185652	NTF3	4908	-2.347	-1.154	-1.7505	TGGCATCCAAGGTAACAACA	TCCCCTCGGTGACTCTTATG
394	ENSG00000113761	ZNF346	23567	-1.175	-2.321	-1.748	TGGAGCACATGATCCAGAAG	TTGAAAGTTGCATGGCAGAG
395	ENSG00000102804	TSC22D1	8848	-2.122	-1.374	-1.748	TGACAAAATGGTGACAGGTAGC	CAGAAACCCCTACTGGGAAA
396	ENSG00000168264	IRF2BP2	359948	-2.147	-1.346	-1.7465	CCAACCAGGTTCACTCCACT	CATCTCCAGCAAGGATGGTT
397	ENSG00000198576	ARC	23237	-2.313	-1.177	-1.745	TTCCTGAGCCACCTAGAGGA	AGCCACAGGCTGGATGTAGT
399	ENSG00000140950	KIAA1609	57707	-1.991	-1.496	-1.7435	GTGATCGAGGACTGGGTGTT	GCAGATGGAGAACAGGAAGC
398	ENSG00000122692	SMU1	55234	-1.996	-1.491	-1.7435	TGGCCATTCCTCCTTTGTTA	CCTTCTCGTGCACTGTCAAA
400	ENSG00000164182	NDUFAF2	91942	-3.166	-0.32	-1.743	TTGTGGAGATCGCTGTCAAG	AGGATCCTGGCTGAAAGGTT
401	ENSG00000105701	FKBP8	23770	-1.568	-1.917	-1.7425	TGGTCACTGCTGACTCCAAG	GTTGGAAGGTTCCAGCTTCA
402	ENSG00000177272	KCNA3	3738	-1.602	-1.881	-1.7415	TGGTTCTCCTTCGAACTGCT	CAATGCGATGGTCAAGACAC
403	ENSG00000128309	MPST	4357	-1.603	-1.879	-1.741	CCCCTTCACAGACTTCCTGA	CTGGCCTTTGAGATGTCACC
405	ENSG00000196359	n.a.	n.a.	-1.696	-1.784	-1.74	ACCGCAGGGAGAGTTACCTT	GACTCCCTGGTCTTCCTTCC
404	ENSG00000114737	CISH	1154	-1.875	-1.605	-1.74	CTGGTTCTTCCCTGTGGAAA	TGGAAGAGAAAAGACCACCAA
406	ENSG00000186407	CD300E	342510	-1.101	-2.378	-1.7395	GACCCAGGCTCCGTTACATA	CTGGATGTGTGGTCCTCCTT
407	ENSG00000174748	RPL15	6138.65	-1.754	-1.724	-1.739	CTACAAGGCCAAGCAAGGTT	AGAGTATTGCGCCTTCTCCA
408	ENSG00000185340	GAS2L1	10634	-1.613	-1.864	-1.7385	CCCTGGCTTGCACTGAAC	GCCTCCTCTAAGGCATTCAA
409	ENSG00000007516	BAIAP3	8938	-1.748	-1.729	-1.7385	CCACGTATGCCCTGAAAGTC	GAAGTCATCGGTGTGGTCCT
410	ENSG00000141556	TBCD	6904	-1.997	-1.477	-1.737	TTCCAGGCTTCCTTCTGAAA	CGGAAACGGTCAATCTTCTC
411	ENSG00000183751	TBL3	10607	-1.998	-1.474	-1.736	GCTGGCTACAGTGAGGAGGT	GTTGTCTGGGGCTGTGTTCT
412	ENSG00000120693	SMAD9	4093	-1.566	-1.903	-1.7345	ACTGCTAGGCTGGAAGCAAG	GCTGAGCTGGGGGTTATATTC
413	ENSG00000139160	C12orf72	254013	-0.801	-2.665	-1.733	TTCAGTGGACACAGCATTCAG	TGCTGCCACCATTGAGTATG
414	ENSG00000184164	CRELD2	79174	-2.063	-1.399	-1.731	GAGGAAAAGACGCTGTCCAA	AGATGCTGTGGGTCTCGTTC
415	ENSG00000137203	TFAP2A	7020	-2.599	-0.862	-1.7305	CTGTCCAAGTCCAACAGCAA	AGCTACTGCTTTGGCAGGAA
416	ENSG00000100299	ARSA	410	-1.574	-1.886	-1.73	CACTGCAGACAATGGACCTG	TGAGCAGTCAGAGAGCTGGA
417	ENSG00000121722	n.a.	n.a.	-2.094	-1.361	-1.7275	CGAACTCCTGGATGAAGTGC	ATTCCTGGCCCATAACCTCT
418	ENSG00000120333	MRPS14	63931	-2.14	-1.311	-1.7255	CATCAGCTTCAGGCCAAGTT	GGCCCCTGTAGAGATTAGGG
420	ENSG00000104953	TLE6	79816	-1.717	-1.733	-1.725	GGGATCAGAGTGTGGTCAGG	TGGAAGAGACGTCACAGCAC
419	ENSG00000134686	PHC2	1912	-1.445	-2.004	-1.7245	ACGCCTTAACGCTGTGTGTA	CCAAGAGCTGCCTTCTTCAC
421	ENSG00000165480	C13orf3	221150	-1.708	-1.741	-1.7245	TCCCCCTTTAAACGTTGACC	GCCTGGAAATCTCCCTCTTT
422	ENSG00000171608	PIK3CD	5293	n.a.	-1.724	-1.724	CTGGCTGAAGTCCAAGAACC	GATGTCTTTGGAGCAGCTGAG
423	ENSG00000011132	APBA3	9546	-1.636	-1.81	-1.723	ACACTCAGCATCGTCCACTG	GACCCTGATCCGAGACTTTG
424	ENSG00000172137	CALB2	794,100134265	-1.462	-1.982	-1.722	TGCGTCTACCCAGACTCAGA	GAGCACGCCGAGTAAAGAAG
425	ENSG00000142534	RPS11P5	6205	-2.855	-0.587	-1.721	AGATGGCGGACATTCAGACT	GTGACCTTGAGCACGTTGAA
427	ENSG00000136378	ADAMTS7	11173	-1.886	-1.554	-1.72	CAAGTGGCAGAAAAGCATCA	CATCATAGAGGACGCCAGGT
426	ENSG00000165102	HGSNAT	138050	-1.926	-1.514	-1.72	ACAACCAGTCCCACAAGGAG	AAAAACACCCATGGCAATTC
428	ENSG00000137818	RPLP1	6176,100129028	-1.419	-2.019	-1.719	GGTCCTTCCGAGGAAGCTAA	AGACCAAAGCCCATGTCATC
429	ENSG00000163599	CTLA4	1493	-0.741	-2.695	-1.718	CTCAGCTGAACCTGGCTACC	CTTCAGTCACCTGGCTGTCA
430	ENSG00000125430	HS3ST3B1	9953	-2.027	-1.409	-1.718	CCTTCGAGAGCTTGACGTTC	AGCCACGTGGGTAAGGTACA
431	ENSG00000101435	CST9L	128821	-2.251	-1.183	-1.717	ACGAGCAAAGGGACTGTGAT	GCTCAGCCACTGAAGAGTCC
432	ENSG00000182851	GPIHBP1	338328	-1.755	-1.677	-1.716	GTCCAGCCTGTGCAATGTC	TCCCATGGCAGAAGTTAAGG
433	ENSG00000185070	FLRT2	23768	n.a.	-1.714	-1.714	AAGAGCTGCACCTGGATGAC	GGCTGTCAAAGGAATGTGGT
434	ENSG00000165699	TSC1	7248	-1.549	-1.876	-1.7125	CTCCACAGCCAGATCAGACA	TTCTTGGCCAGGTGAGATTC
435	ENSG00000169562	GJB1	2705	-1.643	-1.781	-1.712	CTGCTCTACCCTGGCTATGC	TGCTCACTCAGCAGCTTGTT
436	ENSG00000197600	n.a.	n.a.	-1.934	-1.49	-1.712	TACAAGACCAAGGGGTTTGC	GCACTGAAAAGAGGGAGCAC
437	ENSG00000148156	ACTL7B	10880	-1.16	-2.263	-1.7115	AGTACGCGGAGCTCATGTTT	TGGAAGAGCATCTCAGAGCA
438	ENSG00000126602	TRAP1	10131	n.a.	-1.71	-1.71	AGCGCACTCATCAGGAAACT	TCAAACTCACGAAGGTGCAG
439	ENSG00000127527	EPS15L1	58513	-1.817	-1.601	-1.709	TCCCACTGGAAATTCGTTGT	TGTCTCCAGAGAGCAAACCA
440	ENSG00000158286	C1orf188	388591	-1.867	-1.548	-1.7075	TGTGCAGAGCCAATACGAAG	CAGGACGTCTCCCATGATCT
441	ENSG00000112769	LAMA4	3910	-1.635	-1.779	-1.707	CCCTGGAAGAGCACTACTGG	CCCTGATGGAATCTCCGATA
442	ENSG00000185640	KRT79	338785	-1.631	-1.782	-1.7065	GGAGAGCAGGATGTCTGGAG	TTTAACCTTCCCTCCCATCC
443	ENSG00000184348	HIST1H2AK	n.a.	-1.46	-1.951	-1.7055	GGCTAAGACCCGTTCTTCAA	CTACTTGCCCTTGGCCTTGT
444	ENSG00000177192	PUS1	80324	-1.679	-1.73	-1.7045	TCCCTCTCACATTCGGATTC	GGCATAACCCTTCACAATGG
445	ENSG00000095777	MYO3A	53904	-1.576	-1.827	-1.7015	CCAGATTGACAAGAGCCACA	TTCATTCTGTTCCCATGCAA
446	ENSG00000163584	RPL22L1	200916	-1.216	-2.187	-1.7015	AGACAGGAAGCCCAAGAGGT	GGAGCCTTTGCCTAGTCCTC
447	ENSG00000163812	ZDHHC3	51304	-1.024	-2.377	-1.7005	GTGCCATCGTTACCTGGTTT	GAAGTGGAATCCCACCATGA
448	ENSG00000198077	CYP2A7	1548.15	-1.111	-2.287	-1.699	GGATGACAAGGGGCAGTTTA	CAGCTCGGAAGCACCTTATC
450	ENSG00000107882	SUFU	51684	-0.942	-2.452	-1.697	GGCTTTGAGTTGACCTTTCG	CTGTCTCGATGCCTTTGTCA
449	ENSG00000141655	TNFRSF11A	8792	-1.718	-1.676	-1.697	ATGCGGTTTGCAGTTCTTCT	TGCTGACCAATGAGAGCATC
451	ENSG00000173369	C1QB	713	-2.023	-1.369	-1.696	GACCACGTGATCACCAACAT	TTCACTCAGCAGCATTCACC
452	ENSG00000103495	MAZ	4150	-2.613	-0.778	-1.6955	AGAACCATGCCTGCGAGAT	CTGTGCACCTTCATGTGGTC
453	ENSG00000122026	RPL21	6144,387753,388621,440575,653156,653665,728782,729402,100129685	n.a.	-1.695	-1.695	GAACCGCCATCTTCCAGTAA	CTCCTTCCCATTGGTTCTCA
454	ENSG00000172915	NBEA	26960	-2.816	-0.574	-1.695	CACCCAGGGGTATATACACTTTCT	CACCATGATCTCAAGATGAAATG
455	ENSG00000174136	RGMB	285704	-1.403	-1.985	-1.694	CCCAATGTCGAATCCAGAAA	AGGCCCCTTCTACTTTGCAT
456	ENSG00000196182	STK40	83931	-1.795	-1.588	-1.6915	CCCATCTCTAGGTGGCTCAG	ACTGGGATATGTTCCCACCA
457	ENSG00000155093	PTPRN2	5799	-1.616	-1.765	-1.6905	CGGATTCATACCCTCCTGAA	TCTGGCTCTTGACGTTCTCC
458	ENSG00000143418	LASS2	29956	-2.107	-1.274	-1.6905	GGCCGTCATTGTGGATAAAC	GGCAGGATAGAGCTCCAGTG
460	ENSG00000125954	FNTB	2342.92	-1.718	-1.662	-1.69	GAACCCATCCCCCAGATAGT	TCCTCCTTCAAATCGCATCT
459	ENSG00000146674	IGFBP3	3486	-1.634	-1.745	-1.6895	ACAGCCAGCGCTACAAAGTT	GGTCATGTCCTTGGCAGTCT
462	ENSG00000188244	n.a.	n.a.	-1.157	-2.22	-1.6885	CAGCTCCTCTCCATCCTCAC	GTGTCTCCTCCCTGATCCAA
461	ENSG00000161533	ACOX1	51	-1.759	-1.618	-1.6885	AAGCAAGGAGGTAGCTTGGA	ATTCGTGGACCTCTGCTTTG
465	ENSG00000124444	ZNF576	79177	-1.599	-1.772	-1.6855	AGGAGAGAAGTCCCCAGAGC	AAGTCCTGACCGCACTCTGT
464	ENSG00000144671	SLC22A14	9389	-1.928	-1.443	-1.6855	CAGCATGAGGTAGCAGGACA	ATCGCTTCTTAGCGTCAGGA
463	ENSG00000117899	MESDC2	23184	-2.21	-1.161	-1.6855	CTCCCCGGAAGAAGAAGAAG	GGCCCTCCAGAGTTACATCA
466	ENSG00000164520	RAET1E	135250	-1.368	-2.001	-1.6845	AGCCTTGGAGATCATGGTTG	AGGTCATGTTCATTGCGTCA
468	ENSG00000152049	KCNE4	23704	-2.222	-1.143	-1.6825	AAGAGGCGGGAGAAGAAGTC	CGCACTGTGAAAGTGAAACC
467	ENSG00000163704	PRRT3	285368	-1.907	-1.457	-1.682	TGCTGAAGAGATGCCTGAGA	AGCACTGGCCTCTTGACAGT
470	ENSG00000124562	SNRPC	6631	-1.169	-2.189	-1.679	CCTCACCCATGACTCTCCAT	CAGCATGATCTCCTGGTGAA
469	ENSG00000173540	GMPPB	29925	-2.33	-1.028	-1.679	GGTGCTGGAGAAGGAAATGA	GTCCATCCAGAAGCCCTGTA
471	ENSG00000167553	TUBA1C	84790	-2.446	-0.912	-1.679	GCCCTACAACTCCATCCTCA	AGGCAGCAAGCCATGTATTT
472	ENSG00000135828	RNASEL	6041	-1.991	-1.366	-1.6785	AGGCATCTACCTGGGGTTCT	GATCTCCAGCCCACTTGATG
473	ENSG00000178860	MSC	9242	-1.862	-1.494	-1.678	CCTCGCCCAGTGACAACT	TGCACGTAGCCGTTCTCATA
474	ENSG00000172458	IL17D	53342	-1.936	-1.414	-1.675	TCAACTCCAGCATCGACAAA	CCCTATCTCTTTGGCAAGCA
475	ENSG00000100647	KIAA0247	9766	-1.521	-1.823	-1.672	CTTGGAGACGGACTTGCTTC	CAGCCTCCTCGTATGATGGT
476	ENSG00000140987	ZNF434	54925	-1.592	-1.751	-1.6715	CTGGGGCTATGAAGAGACCA	TCCTTTTCATCCCTGTCTGC
477	ENSG00000184557	SOCS3	9021	-1.906	-1.437	-1.6715	CTTCAGCTCCAAGAGCGAGT	ACGGTCTTCCGACAGAGATG
478	ENSG00000159346	ADIPOR1	51094	-2.137	-1.206	-1.6715	GCCATGGAGAAGATGGAAGA	GGGACAAAGCTCCCCATAAT
479	ENSG00000142208	AKT1	207	-1.899	-1.443	-1.671	ACAATCCGATTCACGTAGGG	GGGCTTTCCTGTCACAAAGA
481	ENSG00000172534	HCFC1	3054	-2.431	-0.909	-1.67	GCAATTGCCTCAATGAGCTG	AAAGGCTGAGATTTCGCTGA
480	ENSG00000185385	OR7A17	26333	-1.67	n.a.	-1.67	ATCATCCTGGCCACAATCTC	GCAAGGTGGATGACCTGATT
482	ENSG00000188807	TMEM201	199953	-1.561	-1.777	-1.669	GTCAACTGCTGGTTCTGCAA	CGGTTCTGGTGCTTGATGTA
483	ENSG00000090238	YPEL3	83719	-1.821	-1.517	-1.669	ACGTTTCAGGCCTACTTGGA	GAGCTAGATCCGTCCTCTGC
485	ENSG00000138172	CALHM2	51063	-2.254	-1.082	-1.668	GGAACTGATTGCCAACTTCC	ATAAAGGAGCCCACTGGTGA
484	ENSG00000197205	n.a.	n.a.	-0.73	-2.606	-1.668	GGCCATATGCCCATATTCAT	TGCCCTCTTTCACCACTACC
486	ENSG00000146067	AC145098.2-2	54540	-1.565	-1.769	-1.667	GCCCAAATGACTCCAACTGT	AGAGGCCCGAGAGCTTATGT
487	ENSG00000136710	CCDC115	84317	-1.955	-1.376	-1.6655	AAGGTGGTGAGAGCTGGTGT	GACACAGAAGGGGCATTAGC
489	ENSG00000129484	PARP2	10038	-2.24	-1.083	-1.6615	ACACCCATTGGACCAACACT	GCCCCTTGGTGCTATGTTTA
488	ENSG00000088888	MAVS	57506	-0.929	-2.393	-1.661	CCTTGGCTGCTACAGCTTTT	TTAGGGTAGGGGGACAGAGG
490	ENSG00000184674	GSTT1	2952.28	-0.953	-2.368	-1.6605	ACTATGGGCCTGGAGCTGTA	AGGGTCACATCCAACTCTGC
491	ENSG00000166135	HIF1AN	55662	-1.291	-2.028	-1.6595	GGGACCTTGAATACCTGCAA	GGGTGATGAACAGGGTATGG
492	ENSG00000167393	PPP2R3B	28227	-0.547	-2.771	-1.659	AGCTGACCGAATTCTTCTCG	GCGTGATCTTCCCTTCAGTC
493	ENSG00000138326	RPS24	6229	-1.412	-1.906	-1.659	GCAAGACATGGCCTGTATGA	CAGTGGCCACAGCTAACATC
494	ENSG00000136213	CHST12	55501	-0.566	-2.748	-1.657	GTGTCCTTCGCCAACTTCAT	CAGCATTCCCTTCCACATTT
495	ENSG00000131508	UBE2D2	7322	-1.934	-1.378	-1.656	AATGGCAGCATTTGTCTTGA	TGCTAGGAGGCAATGTTGGT
496	ENSG00000099822	HCN2	610	-1.526	-1.781	-1.6535	CTGTTCATGGTGGGAAACCT	GATCTCCTCCCACTGATGGA
497	ENSG00000101439	CST3	1471	-1.496	-1.809	-1.6525	GCAGCGGGTCCTCTCTATCT	ACAGGTGGATTTCGACAAGG
498	ENSG00000169427	KCNK9	51305	-0.898	-2.406	-1.652	CTACTTTGCGATCACGGTCA	GATGCCCTCTCTTCAGCATC
499	ENSG00000135916	ITM2C	81618	-2.103	-1.199	-1.651	GGCATGGGCTTCAGAAGTAT	GCTTGGAGAAAGCAATGAGC
500	ENSG00000158025	n.a.	n.a.	-2.177	-1.122	-1.6495	TGGACCACTGCAAAGAACAG	CCAGGCTATCAGGTCCTCTG
501	ENSG00000183615	FAM167B	84734	-1.142	-2.154	-1.648	ACCTCTCCCTGGGCAATACT	GTGACAGGCTTGGTCCATCT
503	ENSG00000139410	SDSL	113675	-1.005	-2.289	-1.647	CAGCATGTACCCATCATTGC	CCTCCTCATCCAGACACAGG
502	ENSG00000149499	EML3	256364	-2.269	-1.025	-1.647	ACTGCAGGAGATTGGACTGG	CTGGGGTCTTGGAATCTGAA
504	ENSG00000105695	MAG	4099	-1.932	-1.357	-1.6445	TTCAGGTGGACCCAGAAGAC	CAGGTCCCCACGGAAGTAGT
505	ENSG00000058404	CAMK2B	816	n.a.	-1.643	-1.643	CTGTCAGCCAGAGATCACCA	CTCTTTGCGAAGGACCTCAG
506	ENSG00000131914	LIN28	79727	-1.67	-1.615	-1.6425	CACTTCTGCCAGAGCATCAG	ACTTCCCTATCCAGGCCACT
507	ENSG00000081791	KIAA0141	9812	-2.003	-1.282	-1.6425	GAACCTCACGCCTACCACAT	AAGGCTAAGGTGAGCACCAG
508	ENSG00000102898	NUTF2	10204	-2.585	-0.698	-1.6415	GACAACAGTTCCAGGGGAAA	AGCATCCAAACATCATGCAC
509	ENSG00000164662	n.a.	n.a.	-1.796	-1.486	-1.641	TGACCTTCCCGACCACTTAC	TCACACCCACTTCTTGCTCA
510	ENSG00000175514	GPR152	390212	-2.216	-1.061	-1.6385	CTCTACCTGGCCTTCCTGTG	GGGCCACAGAATCTGACTGT
511	ENSG00000196892	n.a.	n.a.	-1.4	-1.872	-1.636	GCCACTGGAGTCAGGATAGC	CCGACGTACTCTGGAGGTGT
512	ENSG00000131797	n.a.	n.a.	-2.471	-0.8	-1.6355	GGTCAAGGCTGTGGACAGAT	CCAGGTGCAGTGAGAAGTGA
513	ENSG00000160767	C1orf2	10712	-1.635	n.a.	-1.635	AGGGGCCTTACCCACCTC	AGGGGCAACTTTCAGTTCCT
514	ENSG00000186191	C20orf186	149954	-0.784	-2.485	-1.6345	CACCAATGGCATGTTTGAAG	CTCAGCACCAAAAGGTCCTC
516	ENSG00000097021	ACOT7	11332	-1.961	-1.303	-1.632	CGACTTCCTGTCTCCCATGT	ACGATGTTGGTCTTGCAGTG
515	ENSG00000188560	n.a.	n.a.	-0.722	-2.542	-1.632	TTTCTGCTGTTGTGGAGCTG	CATCGCTGGAGTCGTAGTCA
517	ENSG00000171298	GAA	2548	-1.61	-1.653	-1.6315	CTGGCCAGGAATAACACGAT	GTGCGATCTAGGGAGAAAGC
518	ENSG00000141252	VPS53	55275	-0.977	-2.282	-1.6295	CGAATCCCAAGACAAGAACC	TCTTCTAGCTGCTGGGTGGT
519	ENSG00000181577	n.a.	n.a.	-1.118	-2.14	-1.629	TTTGTTTGGCTTGCAATGAG	CCTTCTCCAGCCCTTAGTGA
520	ENSG00000167264	DUS2L	54920	-1.959	-1.298	-1.6285	TTAAAGGGACACGCAGACCT	TTGGTGTTGGTGTAGTGGTTG
522	ENSG00000111987	n.a.	n.a.	-0.378	-2.878	-1.628	ACCTGAGCATCTGTGGAACC	AGTGAGAAAGGCAGGTGCTG
521	ENSG00000143624	INTS3	65123	-2.388	-0.868	-1.628	GTTTCGCTTCCACCCTATCA	TGCTGGCCCTCAGGTAGTAG
523	ENSG00000183828	NUDT14	256281	-1.121	-2.133	-1.627	GACAGCGTGACCGTTCTCTT	TGAGGAACCATGAGACACCA
524	ENSG00000179133	C10orf67	256815	-1.87	-1.384	-1.627	TGAGGACCGACTGAAAGAGG	CCACCTCTTGATGGGAGAGA
525	ENSG00000125846	ZNF133	7692	-1.787	-1.465	-1.626	CCCTGGATCTTCACATGCTT	TTAGGCTGAAGCCCTTCTCA
526	ENSG00000147813	NAPRT1	93100	-1.38	-1.87	-1.625	AGTGGTCTCCCCAACTTCCT	CAGCATGTCCATGAGTGGAG
527	ENSG00000027847	B4GALT7	11285	-1.634	-1.615	-1.6245	GCTGGACTATGGCTTTCCTG	CTCACTGTCCATCCAGCTCA
528	ENSG00000141756	FKBP10	60681	-1.448	-1.799	-1.6235	GCTCTGCCGTGCTAATCTTC	CCATCCTTGTTGAGGTCCAT
530	ENSG00000054356	PTPRN	5798	-0.894	-2.352	-1.623	CTCAGGCAGCTTCATCAACA	AACTGGGAGGACACACTGCT
529	ENSG00000047579	DTNBP1	84062	-1.802	-1.444	-1.623	GAGGCCTGAGGAGAGGAGAC	GCTGGGACTGCATATGTTTG
531	ENSG00000161055	SCGB3A1	92304	-0.739	-2.506	-1.6225	CGGGTATAAGAAGCCTCGTG	AGCGTCTTGTCCTCAGGTGT
532	ENSG00000144214	LYG1	129530	-1.938	-1.306	-1.622	GGTGTTTCAGGAGCCGTAGA	AATCCAGGATGTGGGAGCTT
533	ENSG00000110717	NDUFS8	4728	-1.382	-1.857	-1.6195	ATCCCGAGATGGACATGAAG	CCCGTTGTTGAGCAACTTCT
534	ENSG00000186543	n.a.	n.a.	-2.093	-1.144	-1.6185	TAGAGCAGCTGGAAGGGAAG	ACTCATAGGGAGCCCTCCAG
535	ENSG00000111215	PRR4	11272	-0.964	-2.272	-1.618	TCAGTGGTCCTTCTGGCTCT	TCTTGCTGGTCTGTCCCTCT
537	ENSG00000164411	GJB7	375519	-0.581	-2.652	-1.6165	TGTTTGTCTTCCGTTTGCTG	TTGGGACAAGGCTTCAAATC
536	ENSG00000163012	ZSWIM2	151112	-1.26	-1.973	-1.6165	TCAGCAGTGAATGGACAAGC	TTCCACTGATGCATGGACTT
538	ENSG00000182899	RPL35A	6165	-2.072	-1.159	-1.6155	TTCTCTTACCGCCATCTTGG	TCCTTGAGGGGTACAGCATC
539	ENSG00000154229	PRKCA	5578	-1.186	-2.044	-1.615	CCATCCGCTCCACACTAAAT	CAGTTCTTCTGTGCCCTTCC
540	ENSG00000146701	MDH2	4191	-1.637	-1.592	-1.6145	ATGCTGGGAAGACCATCATC	CACGAAATCTTCCCCCTTCT
541	ENSG00000185553	n.a.	n.a.	-0.571	-2.657	-1.614	ATTTTTGCTGCACGTGCTTA	GGCAACCTCCTCTTCTGGTT
542	ENSG00000135587	SMPD2	6610	-1.982	-1.244	-1.613	GTGGCCTCTGTGTCTTCTCC	ACCATTGTGTTGCCTTCCTC
543	ENSG00000125695	STRADA	92335	-2.04	-1.185	-1.6125	GTGCCATATCGAGCCACTTT	GACCTTCCCATCCACAGAGA
544	ENSG00000081842	PCDHA13	56134,56135,56136,56137,56138,56139,56140,56142	-1.261	-1.963	-1.612	CACCTGCCAATCACAGCTT	CATTCACATACACAAGCACAGAG
545	ENSG00000072315	TRPC5	7224	-2.513	-0.711	-1.612	ATGACCTGGCCAAGTTGAAG	AAATCCATCAGGTTCCACCA
546	ENSG00000136875	PRPF4	9128	-2.053	-1.17	-1.6115	GACAACAAGGACCTCCCAGA	GAACGGTCATAGCAGGTGGT
547	ENSG00000129991	TNNI3	7137	-1.119	-2.102	-1.6105	TAAGATCTCCGCCTCGAGAA	CCTCCTTCTTCACCTGCTTG
548	ENSG00000115468	EFHD1	80303	-1.28	-1.941	-1.6105	GGCAAAGCTTTCTGAGATCG	AGCAGAGGCAGGAGACAGAG
549	ENSG00000171132	PRKCE	5581	-1.299	-1.922	-1.6105	AGCTTTGGCAAGGTCATGTT	GTGGTCGTCACACCATTCAG
550	ENSG00000134452	FBXO18	84893	-2.263	-0.956	-1.6095	GCACTCAGGCCACAAAAGTT	CAATGGTCAGCTCTTCGTCA
551	ENSG00000128185	DGCR6L	85359	-1.38	-1.836	-1.608	AAGATCATCCTGGAGCTGGA	ACTCTCTGCCTGGTCCTGAA
553	ENSG00000011105	TSPAN9	10867	-2.208	-1.006	-1.607	GCGGAATATCCTGGAACCTT	TTCTCGGTGTGGTACAGCAG
552	ENSG00000171773	NXNL1	115861	-0.952	-2.262	-1.607	ACAATAGCGACCAGGACGAG	CTCTGGCAGCTGGAAGTTG
554	ENSG00000102924	CBLN1	869	-1.362	-1.849	-1.6055	GCTTTCTCTGCCATCAGGAG	ACGAGCCAGTCAGAGAGGAA
555	ENSG00000125319	C17orf53	78995	-1.72	-1.49	-1.605	CAGAAGCTGTTTGCTGTGGA	AACTTGCTGCTGTTGGCTCT
556	ENSG00000074842	C19orf10	56005	-1.766	-1.44	-1.603	AAGACCACCAGCACTTCACC	CTGGACCCTCTGTTCTCTGC
557	ENSG00000156968	MPV17L	255027,100133904	-3.051	-0.155	-1.603	CTTCCACGCCAACTTCAACT	TGTCTGCAGGCAATTCTGTG
559	ENSG00000143850	PLEKHA6	22874	-1.106	-2.097	-1.6015	ACCCCATCAGCAGTGGTAAG	GTACCGTTCAGGGATGAGGA
558	ENSG00000163909	HEYL	26508	-1.691	-1.512	-1.6015	ATAGAGAAACGGCGTCGAGA	CCCTGGACAGCTATGGAAGA
560	ENSG00000102054	RBBP7	5931	-1.022	-2.18	-1.601	TTCAGTGGCCCAGTCTTACC	AGCCTTCCTTCTGGTGACCT
561	ENSG00000103148	C16orf35	8131	-1.296	-1.902	-1.599	AAGGTCCTCAGTCCCCATTC	CTTGCCCCAGTACACCAGAT
562	ENSG00000125903	DEFB129	140881	-1.017	-2.175	-1.596	GGATCACTGCAATGTGGATG	TTGGCAGTATGTTTGGTGGA
563	ENSG00000135631	RAB11FIP5	26056	-1.518	-1.673	-1.5955	CAACCTTCCTGCTGTCTTCC	CCCCCATTTTTGCTAATTCA
564	ENSG00000188873	AC120036.5-2	n.a.	-1.82	-1.36	-1.59	CCACCCCAAGTTCTCTGTGT	CGGACATTCTGCCAGTTTTT
565	ENSG00000154118	JPH3	57338	-1.642	-1.537	-1.5895	GAGTCCGTTTTCACCGTTTG	GAGTAGGTCTCGGTCCCGTA
566	ENSG00000175287	PHYHD1	254295	-1.009	-2.169	-1.589	CGGGATAACAGCCTCTTTGT	TAGGGAGGCAGAGAGGTGAA
567	ENSG00000110203	FOLR3	2352	-1.187	-1.989	-1.588	ACAGCTGTCTCGAGTGCTCA	GTTGTTGGAAGAACCCCAGA
568	ENSG00000102805	CLN5	1203	-1.225	-1.949	-1.587	GGGCAAAGGAGTGTGTGTTT	CAGGTGTTCCTTGCTTGGAT
569	ENSG00000179091	CYC1	1537	-1.689	-1.484	-1.5865	CCAAAACCATACCCCAACAG	TATGCCAGCTTCCGACTCTT
570	ENSG00000099308	MAST3	23031	-1.818	-1.352	-1.585	AGCTTCATCGTCCAGCTTGT	TTCTCGGCAAAGGTGAGAAT
571	ENSG00000171126	KCNG3	170850	-1.748	-1.42	-1.584	TGCATAGGTTGGTTCACTGC	GCAGCAGGAATGCTGGTAA
572	ENSG00000169429	IL8	3576	-2.687	-0.48	-1.5835	AAGAAACCACCGGAAGGAAC	ATTGCATCTGGCAACCCTAC
573	ENSG00000158106	RHPN1	114822	-1.131	-2.034	-1.5825	CTACAGAGCCACCAGCAACA	CCCAGTAAGCGAGTCGTACC
575	ENSG00000169906	S100G	795	-1.357	-1.808	-1.5825	CTATTGGGCAACCAGACACC	ACCAGAGACTTTGGGGGATT
574	ENSG00000120952	PRAMEF2	65122	-2.05	-1.115	-1.5825	CCAGGATGAATGCCTGAGAT	ACAGCAGCACGTAGCTGAGA
576	ENSG00000172893	DHCR7	1717	-1.838	-1.319	-1.5785	AACGCTCATCTCCTGTCCTG	TCATGGCAGATGTCAATGGT
577	ENSG00000178351	n.a.	n.a.	-1.271	-1.885	-1.578	GGCTGGAGCTGGAGTAACAA	CCCTGAGATTCTGGCTTCAC
578	ENSG00000149503	INCENP	3619	-1.634	-1.52	-1.577	CACCTGCTGGAGCTATGTGA	CGGGCTTCTTAGTCAGCATC
579	ENSG00000189280	GJB5	2709	-1.915	-1.238	-1.5765	GGACTGCTTCATCTCCAAGC	CCAGAGCGTCTGAATCCTCT
580	ENSG00000173928	C19orf39	126074	-1.675	-1.474	-1.5745	TACCTAGCGGAAGACCCAGA	AGTCACCCACCAAAGCTCAG
581	ENSG00000023191	RNH1	6050	-2.211	-0.937	-1.574	CCCAGAACAGGTTTCTCCTG	CGGATCTGAGCGTTTCTCTT
582	ENSG00000158792	C16orf76	124044	-1.748	-1.398	-1.573	TTGGTGGGTCCAGTGGTAAT	CTGATGTTGACCGTCCCTCT
584	ENSG00000188152	FAM22G	441457	-1.196	-1.948	-1.572	AACCTCTCCTCCCCAGGAC	GGGGTCACCCTTTCTCTTTT
583	ENSG00000149016	EEF1G	1937,64852	n.a.	-1.572	-1.572	AGGGATGTGGATTCTGCTCA	CACACAGCCAGGGAAGAACT
585	ENSG00000172638	EFEMP2	30008	-2.088	-1.049	-1.5685	TCCTATGGGACCTTCCTGTG	TCCGAGGTGATGGTCATGTA
586	ENSG00000103489	XYLT1	64131	-1.119	-2.017	-1.568	ATGCAAGGTTCATTCGGAAG	TGCCCAATGATTTCCTGATT
587	ENSG00000173638	SLC19A1	6573	-1.735	-1.401	-1.568	ACTACGTGCACATCCTGTGG	CACGTCCGAGACAATGAAAG
588	ENSG00000140545	MFGE8	4240	-2.437	-0.698	-1.5675	AGGAGATGTCTTCCCCTCGT	CCGCGTTTTTGTTCCAGTTA
589	ENSG00000168883	USP39	10713	-2.082	-1.052	-1.567	TGCAAACTTGGACAAGCAAG	TGAAATTTCGAGGGTTCCAG
590	ENSG00000180447	GAS1	2619	-1.451	-1.681	-1.566	CCTCATTCAGCTCAACCACA	CGTCATCGTAGTCCTCATCG
591	ENSG00000144043	TEX261	113419	-1.934	-1.197	-1.5655	TCGCGGCTGGACTCTATTAC	TGGGTAGAATGGCCTCTTTG
592	ENSG00000162063	CCNF	899	-1.165	-1.961	-1.563	CCTACCTCCTCTGGGAAAGC	CTGATAAACCGGGTGCAGAT
593	ENSG00000179826	MRGPRX3	117195	-2.028	-1.097	-1.5625	ATCAACGGACGTGAGGAGAC	GGACCCACAGAGAACCACAC
594	ENSG00000086696	HSD17B2	3294	-1.26	-1.862	-1.561	AGTTGCTTCCATCCAACCTG	ATTGCCTAGGTGGCCTTTTT
596	ENSG00000071859	FAM50A	9130	-0.91	-2.211	-1.5605	GGCCATGTATGAGGAGGAGA	GCCTTGGTGACGATGAAGTC
595	ENSG00000184560	C17orf74	201243	-1.632	-1.488	-1.56	GCAACTATGATGTGGCATGG	ACGTGGGTACTTGGGATACG
597	ENSG00000156804	FBXO32	114907	-1.437	-1.681	-1.559	TGCCTTTGTGCCTACAACTG	TGTTGTCATGTGCTGGGATT
598	ENSG00000019169	MARCO	8685	-1.701	-1.415	-1.558	CAACAAGCTGCTTTTCACCA	CGCCTTGTTCACCTTTGATT
599	ENSG00000105640	RPL18AP11	6142.29	-1.756	-1.357	-1.5565	GTCCCGCTTCTGGTACTTTG	AAGAAGGTGTTGGGCCTCTT
600	ENSG00000143157	POGK	57645	-1.837	-1.271	-1.554	AGGACTGGTTGGAAGTGGTG	TCCTCCTGGCAACTCACTCT
601	ENSG00000133065	SLC41A1	254428	-1.627	-1.48	-1.5535	CAAAGGGAACCTGGAAATGA	GTAGAGTCCCCAGCTGATGC
602	ENSG00000166313	APBB1	322	n.a.	-1.553	-1.553	TTACTGGCACATCCCAACAG	CATGCAGGTTGTTTTTGTGG
603	ENSG00000125740	FOSB	2354	-1.887	-1.213	-1.55	CGGGGAGAAAGTTTTTGGA	GTTGGGGAAGTAAGGTGCAA
604	ENSG00000065054	SLC9A3R2	9351	-2.059	-1.04	-1.5495	CCGACAAGGACACTGAGGAT	CTCGCTCGCTCTCTCTCTGT
606	ENSG00000089009	RPL6P27	6128,641814,646483	-2.2	-0.897	-1.5485	GGTACCCGGGTGGTTAAACT	GCAAACACAGATCGCAGGTA
605	ENSG00000163060	TEKT4	150483	-1.06	-2.037	-1.5485	CCATCACCACTGACAACCTG	GATCTGTGATTTCCCGCAGT
607	ENSG00000099840	C19orf36	113177	-1.637	-1.46	-1.5485	TCAGCTGTACCAGGGGAAGA	GTGCGAGTCTGTGCAGTTGT
610	ENSG00000087589	CASS4	57091	-0.861	-2.232	-1.5465	AATCTGCCTCTGAAGCTGGA	CCCAACTCCTCATCTGCTCA
608	ENSG00000174403	n.a.	n.a.	-1.756	-1.337	-1.5465	GGTCTCTATCGTGGGCAGAA	TCTGAGCTCCAGTGTCCAAA
609	ENSG00000103316	CRYM	1428	-1.952	-1.141	-1.5465	AGAGCCCATTTTGTTTGGTG	GGGACTGGACTCCCTCATTT
612	ENSG00000176160	HSF5	124535	-1.02	-2.071	-1.5455	GGACAATTTCACCGGTCATT	AGAGCATCCATGTGGGTAGG
611	ENSG00000167874	TMEM88	92162	-1.031	-2.06	-1.5455	CCTACAGCCGAGCCCTTTAT	TAAAACGAGGGCACGAGATT
613	ENSG00000148296	SURF6	6838	-1.996	-1.094	-1.545	CAAGTCCTTGGGGGAGAAAT	TCGCTCACCTCCACCTTATT
614	ENSG00000168398	BDKRB2	624	-1.812	-1.277	-1.5445	TGGTTGTGCTGCTGCTATTC	ACTCATTTCCCAAGGTCGTG
615	ENSG00000182667	HNT	50863	-1.155	-1.931	-1.543	CCACCCTCAGGTGCACTATT	CCTGTACCCTTGGCTTCTGA
616	ENSG00000102313	ITIH5L	347365	-1.36	-1.725	-1.5425	GGCCTGTGAAACCAAAGTTC	GTGGGTACTTGGGAACCTGA
617	ENSG00000152284	TCF7L1	83439	-1.259	-1.825	-1.542	CTTTCCCTGGTCACCAAGTC	GGAAATGTCACAATGGCAGA
618	ENSG00000099977	DDT	1652	-1.937	-1.145	-1.541	GAGCTGTTTCCGTTCCTCTG	GGAAGAAGCAGCCAGTTCAC
619	ENSG00000179823	n.a.	n.a.	-1.539	n.a.	-1.539	GCGCTGAGCGATTTAGAGAC	AGGAAAGGCTCTCTGGCTTC
620	ENSG00000177364	n.a.	n.a.	-1.686	-1.391	-1.5385	GCACAAGCAGGTTCTGTTCA	AAAGGCCTGAGTCCAAGGAT
621	ENSG00000179913	B3GNT3	10331	-2.232	-0.844	-1.538	GTCTGGAGCTTGAGGGACTG	CACAGGCACTTCTGCCATTA
623	ENSG00000115825	PRKD3	23683	-1.661	-1.414	-1.5375	CCGTCCCACGATATGTCAG	TCACCATTGTGCTGCTCTTC
622	ENSG00000139163	ETNK1	55500	-2.005	-1.07	-1.5375	AAGGATCCACCAGTCTGTCG	TTTGGATCCAGTGCTTCTCC
625	ENSG00000178028	DMAP1	55929	-1.496	-1.578	-1.537	AAGTTGGGCTCCAAGAAGGT	ACGCTTCTTGAACTGCTGGT
624	ENSG00000177674	AGTRAP	57085	-1.888	-1.185	-1.5365	CTGGGGCTGCATTGTATTCT	CAAGAGACGGAGGTCAGGAG
626	ENSG00000077348	EXOSC5	56915	-1.689	-1.383	-1.536	TCTCTCCTGGCCTGTTGTCT	AGGAGCCCTGTGGTTACAGA
627	ENSG00000186862	PDZD7	79955	-1.541	-1.528	-1.5345	AGGAGAATGGCATCAAGGTG	TGTCCCTGAGGATGACTGTG
628	ENSG00000137193	PIM1	5292	-1.507	-1.561	-1.534	CGACATCAAGGACGAAAACA	GCCAGAAAGGCTGCTATTTG
629	ENSG00000130812	ANGPTL6	83854	-1.276	-1.791	-1.5335	GCCCACTATGATGGCTTCTC	TGAGCCACAAAGAAGGTGTG
630	ENSG00000110375	UPK2	7379	-3.158	0.093	-1.5325	TTGCCCTTGATCCTGATTCT	AGGAACATGGCGACAGAGAG
631	ENSG00000174460	ZCCHC12	170261	-0.924	-2.137	-1.5305	GGGGAGAAGTCTCGGTCCTA	ACTCAGCTCACCGCCTAAAA
632	ENSG00000137225	CAPN11	11131	-2.334	-0.722	-1.528	TTTGAGCCACACAGAGATGC	GTTCAAGGTGCCTGAATGGT
634	ENSG00000135541	AHI1	54806	-1.018	-2.035	-1.5265	AGGGGTGATTGTTGTTTGGA	TCGAATGGGTGACTTGAATG
633	ENSG00000036530	CYP46A1	10858	-1.053	-2	-1.5265	TCAGTCATCGTCACGAGTCC	GCAGTGATTCCCTCCAACAT
635	ENSG00000118432	CNR1	1268	-2.209	-0.844	-1.5265	CGTCTGAGGATGGGAAGGTA	TCTTGACCGTGCTCTTGATG
636	ENSG00000010282	HHATL	57467	-1.828	-1.224	-1.526	CGTCCTCTTTGGTGTTGTCA	TACATGATGATGGCCCAGAA
637	ENSG00000132517	GPR172B	55065	-1.287	-1.764	-1.5255	CTGAGTGTAGTGGGCACAGC	AGTGATGGCAACAGCAACAG
638	ENSG00000135821	GLUL	2752	-1.836	-1.214	-1.525	TTGTGAAGGAATCAGCATGG	GGGCGACGATCTTCAAAGTA
639	ENSG00000010017	RANBP9	10048	-1.3	-1.747	-1.5235	AGCAGGAGAAGGAGTTGCAG	AACAGCCAATGACATCACCA
640	ENSG00000151208	DLG5	9231	-1.229	-1.816	-1.5225	GAAGGCACTGGGGTTTGATA	CGCAGCAGAGATTCACATTC
643	ENSG00000135926	TMBIM1	64114	-1.789	-1.256	-1.5225	TTACTTTTGCCATGGGCTTC	CTGCAGCACAAAGGTGAAGA
641	ENSG00000167800	TBX10	347853	-1.931	-1.114	-1.5225	CGCCAGATTGTGTCCTTTG	GGAAGCTGAAGCTTTGTTGG
642	ENSG00000198089	SFI1	9814	-2.48	-0.565	-1.5225	ACAGGGCCGGTTAAGAGAAC	CGTTGCCTAAACTCCAGAGC
644	ENSG00000137379	n.a.	n.a.	-2.215	-0.828	-1.5215	CATCCAGGAGCTCTTCAAGC	GAATGGGCACCAGAAAGAAA
645	ENSG00000173264	GPR137	56834	-1.035	-2.007	-1.521	CTTGTCTGTCTCCGGGATTC	ACACCACCTGGGCAAAGTAG
646	ENSG00000139187	KLRG1	10219	-1.897	-1.142	-1.5195	AAATGAGTGAGGGCAAGGTG	CGTAAGCACTATCTTAGGTATTTGG
647	ENSG00000183005	n.a.	n.a.	-1.685	-1.353	-1.519	TGCTGAGTGCAAGACCCTTA	CGTGGGCCTGAGTAAAAGAA
648	ENSG00000119421	NDUFA8	4702	-1.008	-2.026	-1.517	AGAGGAAGGCAAACTGGTCA	TTTGTGATCCCGGAAAGAAC
649	ENSG00000187540	n.a.	n.a.	-1.271	-1.763	-1.517	CAGAGCCTCGTCCCTGAG	CTTTGTCCATCAACCCGATT
650	ENSG00000173156	RHOD	29984	-1.21	-1.823	-1.5165	CGTCAAGGTGGTCCTGGT	TAGGTCACAGGCTCCAATCC
652	ENSG00000184156	KCNQ3	3786	-1.198	-1.834	-1.516	ATCGGGTTCGCCTTTCTAAT	ATGGGAAGGTGAATGCTGAC
651	ENSG00000168242	HIST1H2BI	8339,8343,8344,8346,8347	-1.663	-1.368	-1.5155	GACCAAGGCACAGAAGAAGG	AGAAGAGCCTTTGGGTCGTT
653	ENSG00000140495	n.a.	n.a.	-2.064	-0.961	-1.5125	GCATCCTGGACACTCTGGAT	GCTTGAAGTCCTCACCGAAG
654	ENSG00000177302	TOP3A	7156	-1.249	-1.775	-1.512	CTGGAAAAGGCATCGACTCT	GTATTTGGTGGGGTGAATGG
655	ENSG00000167770	OTUB1	55611	-2.066	-0.958	-1.512	ATTGCTGTGCAGAACCCTCT	TCGATGAAGTGCTCGAAGAA
656	ENSG00000063177	RPL18P13	6141	-1.463	-1.56	-1.5115	ACATCCGCCATAACAAGGAC	GTAGGGTTTGGTGTGGCTGT
657	ENSG00000104892	KLC3	147700	-2.073	-0.948	-1.5105	GCTTTGGAGATCCGAGAGAA	TGACATGGCTCTCTTCATTCC
658	ENSG00000175892	AC009336.13-1	100129455	-0.938	-2.078	-1.508	GGAACGTGGACAAGAGGTGT	GGAGGAAGTAGGATCGTTAGCA
659	ENSG00000102003	SYP	6855	-0.99	-2.023	-1.5065	ACCGAGAGTGACCTCAGCAT	TCAGCTCCTTGCATGTGTTC
660	ENSG00000092098	RNF31	55072	-1.871	-1.142	-1.5065	GCCTTGAAGGAGAAGCACAT	GGCGTACGAGAACTTGCATT
661	ENSG00000157227	MMP14	4323	-2.2	-0.811	-1.5055	GCAGAAGTTTTACGGCTTGC	AGTGGGTGTCTCCTCCAATG
663	ENSG00000153446	C16orf89	146556	-1.604	-1.406	-1.505	GTGACCAGCAGTGAGCAGAG	AAGGAGGCATCAGTGTGGAT
662	ENSG00000112679	DUSP22	56940.1	-1.724	-1.286	-1.505	AGGCCTATGTTGGAGGGAGT	TCTTCTGAGAAAGGCCCAGA
664	ENSG00000169241	RAG1AP1	55974	-1.231	-1.777	-1.504	AGGCTGCTCATCTGACCACT	ATTACAGGCATGTGCCATCA
665	ENSG00000187912	CLEC17A	388512	-1.963	-1.041	-1.502	CTGTCACCTGTCCACCTCCT	TGGTGCTTGGGGAGAAGTAG
666	ENSG00000197356	n.a.	n.a.	-1.55	-1.452	-1.501	TGCCTGTGGAGAAGAGAGGT	AGCCTGTCTGATCTGGTGCT
667	ENSG00000141837	CACNA1A	773	-1.775	-1.227	-1.501	CACCGATATCCTCGTGACTG	CGAGCAGAGGAAGATGAAGG
668	ENSG00000175213	ZNF408	79797	-1.543	-1.458	-1.5005	AGGACCGAATTTCCAAGGAT	GCCACACTCAGTGCAAAGAA
669	ENSG00000105619	TFPT	29844	-1.521	-1.479	-1.5	GCGAACGGCTTAACCTACAG	CCGAGTTATCCTCTGCACCT
670	ENSG00000013016	EHD3	30845	-1.776	-1.222	-1.499	GCCAGTACTCCACTGGGAAG	GTGGTTCTTGAGGGCTTTGA
672	ENSG00000181619	GPR135	64582	-1.434	-1.562	-1.498	TGATCGTCTTCGTCATCTGC	TCGGATTTAGGCTGTTTGGT
671	ENSG00000168828	OR13J1	392309	n.a.	-1.498	-1.498	CTGTGCCATCCAGATGTGTC	AAGCAGCACTACAGCCAGGT
674	ENSG00000124614	RPS10	6204	-1.221	-1.774	-1.4975	CGCAGAGATGTTGATGCCTA	AAACTGGAATTCGGTTGCTG
673	ENSG00000172782	FADS6	283985	-1.839	-1.156	-1.4975	TCACTACTGGCTGCTCCTGA	ATTCCTCATAGCGACGGAGA
675	ENSG00000163607	GTPBP8	29083	-1.022	-1.972	-1.497	CCCCTGAGGTTGAAGTCAGA	CAGGTGGATTCCAGAAAAGG
677	ENSG00000101349	PAK7	57144	-1.133	-1.859	-1.496	CCTCAGTGCCCTTTCTCAAA	GCAAATTCATCCAACAAGCA
676	ENSG00000179813	C13orf30	144809	-1.562	-1.43	-1.496	CGCTACATTCACAGCCTTCA	TTACTCTCGGCTCCATTGCT
678	ENSG00000105289	TJP3	27134	n.a.	-1.493	-1.493	GTGCAGATGAAGCCTGTGAA	CATCTGGTTCCGAGATGGTT
679	ENSG00000092439	TRPM7	54822	-2.14	-0.844	-1.492	GCCATCTACCGAAGACACTCA	AAGATGCCCTGATTTGAGGA
680	ENSG00000140259	MFAP1	4236	-0.77	-2.213	-1.4915	GAAGATGAGGGTCGTTCTGG	GCCCTTAACAGCTTTGTTGG
682	ENSG00000124019	FAM124B	79843	-1.575	-1.407	-1.491	TGTGAGCTTCTCTTGCCGTA	GAGTCCAGGACGCGAAATAG
681	ENSG00000108094	CUL2	8453	-1.491	n.a.	-1.491	CTTACTCCGTGCTGTGTCCA	AACGTTTTGCCAGCATTCTT
683	ENSG00000180304	OAZ2	4947	-2.05	-0.932	-1.491	GGTCTCTTCTTGGGATGCAG	CACAATAGGCAACCCTCACC
685	ENSG00000109501	WFS1	7466	-0.685	-2.296	-1.4905	GACGACGAAGATGATGACGA	GAGAGCAGGAAATGGGCATA
684	ENSG00000175634	RPS6KB2	6199	-1.611	-1.37	-1.4905	TGACTGAGACCAGCGTGAAC	CTTGAGGTCCCGGTAGATGA
687	ENSG00000187044	n.a.	n.a.	-0.776	-2.203	-1.4895	TTGAGTTGCAAAACGTACCG	AAAGCGACAGTTCTCCGAAA
688	ENSG00000185811	IKZF1	10320.1	-1.109	-1.87	-1.4895	GGGGAGCAGATGAAGGTGTA	CTAGGAAGCGACAGGTGAGG
686	ENSG00000157423	HYDIN	54768,652737,790898,100130198,100134057,100134141,100134222,100134385	-2.506	-0.473	-1.4895	CAGCACCATCCACATACCAC	GCCTGAACAGGAATCCGATA
689	ENSG00000123485	HJURP	55355	-0.228	-2.748	-1.488	AACCAGCTTCATCTCCCAGA	ATGGATTTGGGGTCTGTTGA
690	ENSG00000172023	REG1B	5968	-1.535	-1.437	-1.486	AAGCATGGCTCAGACCAACT	TGAAGTCAGGCTTGCACAGT
691	ENSG00000105499	PLA2G4C	8605	-1.687	-1.283	-1.485	CCAATGATGGTGACATGGAA	CCAAGAGCACTTCCCCATAA
693	ENSG00000110090	CPT1A	1374	-1.125	-1.841	-1.483	CCACTGAGTCATGCGACTTC	CTCAGGGCAAGAGAACTTGG
692	ENSG00000076716	GPC4	2239	-1.737	-1.229	-1.483	CAACATTGAATCGGTCATGG	TTGCTGGTCATCACTCGAAG
694	ENSG00000148702	HABP2	3026	-1.603	-1.362	-1.4825	CAGTGGATGGTCACTGTGCT	GGCTTTGATCCAATTCAGGA
695	ENSG00000137841	PLCB2	5330	-0.665	-2.299	-1.482	TTTGGGAAGTTTGCCAAGAT	GGACAGAGGCTCATGAGGAA
697	ENSG00000183128	CALHM3	119395	-1.336	-1.627	-1.4815	TAAATTCCGCATGCTCTTCC	CTTCTCAGGGTCCACAGAGC
696	ENSG00000002330	BAD	572	-1.787	-1.176	-1.4815	TGACGAGTTTGTGGACTCCTT	TAAACCTGGCTCGCGACTTA
698	ENSG00000117595	IRF6	3664	-1.018	-1.942	-1.48	TTCAGTACCGTGGGAAGGAG	CCATTCTTCCCCAAAGCATA
699	ENSG00000184905	TCEAL2	140597	-2.281	-0.676	-1.4785	TGCCTTCGAATCAAGGAAAG	CTCCACCCTAGCCATGTTGT
700	ENSG00000179846	NKPD1	284353	-1.065	-1.892	-1.4785	GTAAGCCAGCGCAAGAAGAT	ATCTCGCGGTACAACAGGTC
701	ENSG00000112493	TAPBP	n.a.	-1.809	-1.147	-1.478	AATTGCTCTGCCTTGTGTCC	TGCCCTCACTCTGCTTTCTT
702	ENSG00000115128	AC008073.5	51639	-1.497	-1.456	-1.4765	AGCTCCGGAGGAATTTCAGT	TGGTGGATCTGTGTTGATGC
703	ENSG00000180900	SCRIB	23513	-1.037	-1.915	-1.476	CGTCCCTGTCATTTCTGGTC	AGCAGGTTCTCCGTGAGGAT
704	ENSG00000125733	TRIP10	9322	-2.367	-0.585	-1.476	ACAGGCTTACGCCAAACAAC	CTTTCTTCGGCCATGTGACT
705	ENSG00000185792	NLRP9	338321	-1.489	-1.461	-1.475	CGACCCAAAGACGATCCTAA	TCTCCACACACATGCGAAGT
706	ENSG00000090889	KIF4A	24137	-1.792	-1.158	-1.475	GAATTGGCTTGGAAACGAAA	TGCTGTTGCTCCATTCTGAC
707	ENSG00000179515	n.a.	n.a.	-0.549	-2.4	-1.4745	GCAGGCCTGTGAGTTGTTTT	CAGGGTCCTCTCTGGCTTC
708	ENSG00000087152	ATXN7L3	56970	-1.844	-1.102	-1.473	AAACTAGAGGCCATCGCTCA	TTCTTCTCCGAGCCATAGGA
709	ENSG00000179774	ATOH7	220202	-1.971	-0.975	-1.473	ATGCAGGGGCTCAACACT	CTAGGTGGCCATCTGGAAG
710	ENSG00000030110	BAK1	578	-1.858	-1.087	-1.4725	CAACCGACGCTATGACTCAG	CTGCAAGGGAACAGAGAAGG
711	ENSG00000152213	ARL11	115761	-1.394	-1.55	-1.472	CTGGACAGCACAGATGAAGC	CCAAGCCAGCATTTCTTGTT
712	ENSG00000149923	PPP4C	5531	-1.476	-1.466	-1.471	GCTATCCTGATCGCATCACA	CGGCAGATCATGTCAATGTC
713	ENSG00000180881	CAPS2	84698	-4.017	1.076	-1.4705	CAGAATTCTTGCCCACCAGT	GGCTTTCCTATCCAGAGTCG
715	ENSG00000132446	FTHL17	53940	n.a.	-1.47	-1.47	CATCAACAGCCACATCACG	TAGCCACCCAGCTCTTTGAT
714	ENSG00000164850	GPR30	2852	-1.991	-0.949	-1.47	TGAAGCGCCTCAGTTACACA	GCCACAGGTGCTGGAGTATT
717	ENSG00000174871	CNIH2	254263	-1.216	-1.723	-1.4695	GCGTTCTGCTACATGCTCAC	AGAAGGCAAGTTTGCACCAG
721	ENSG00000179564	C3orf45	132228	-1.231	-1.707	-1.469	TAAAGTGGCTATGGGCAGGT	CTTCCACGATGTCACCTTTG
719	ENSG00000173126	n.a.	n.a.	-1.278	-1.66	-1.469	GGAGGAGGAGGAGGAGATTG	ACCCTCAGGCACCCTACTCT
716	ENSG00000168575	SLC20A2	6575	-1.317	-1.621	-1.469	CATTGTCCAGCACTTTCCAG	CTAACTTCCCCAGCCATGAG
718	ENSG00000155893	ACPL2	92370	-1.424	-1.514	-1.469	CTGCTATTGCCCGGTAAGAA	GGCACTGAGAACTGGTGACA
720	ENSG00000176472	ZNF575	284346	-1.254	-1.683	-1.4685	CCTTCTCCTACCCCTCCAAG	CAGTCTCTCTCCCCCTTGTG
722	ENSG00000123505	AMD1	262	-1.818	-1.116	-1.467	CCCTGTTGAAGCTTGCTAGG	TCCATCCGATTTCATTCCAT
723	ENSG00000176826	n.a.	n.a.	-0.376	-2.554	-1.465	GAGTACATTCACGCCCAGGT	GGACACATCCCATGCTAAGG
724	ENSG00000165272	AQP3	360	-1.742	-1.186	-1.464	GACAGAAGGAGCTGGTGTCC	TCCAGAGGGGTAGGTAGCAA
726	ENSG00000130511	SSBP4	170463	-1.59	-1.337	-1.4635	GGAGCCTCACCACGTGAAC	GCAGGAAGGGTCCATACAGA
725	ENSG00000166589	CDH16	1014	-1.662	-1.265	-1.4635	AGGTCAAGGACATGGGTGAC	AGCTCAGGGATGCTGACTGT
727	ENSG00000181027	FKRP	79147	-0.949	-1.977	-1.463	ACCCAAGGCCTGAAGAGAAT	CATCAGGTACTAGGGCCACAA
728	ENSG00000104969	SGTA	6449	-1.372	-1.554	-1.463	TTTCTACGGAAAAGCCATCG	CTGCTGAATCTGGGGATTGT
729	ENSG00000103353	UBFD1	56061	-1.677	-1.247	-1.462	TTGGCACTAAAGAGCGGACT	ACTGCAAGAAAGGGAACTGG
730	ENSG00000198574	SH2D1B	117157	-1.461	n.a.	-1.461	TTGTGAGATTTGGGGTCACA	GACTCCATGAAAGGGCAAAA
731	ENSG00000108468	CBX1	10951	-1.156	-1.762	-1.459	CATGGGAGCCAGAAGAGAAC	CCCACTTGAAACCCACAGTC
732	ENSG00000137825	ITPKA	3706	-1.229	-1.689	-1.459	AAAATGGGCGTCAGGACTTA	TGATCGTGCACAAAGAGGAG
733	ENSG00000175701	n.a.	n.a.	-1.701	-1.215	-1.458	AGGCATCAACAAGAAATGTGG	AGCCTCCTTTTCCTCCAGTC
734	ENSG00000182759	MAFA	389692	-1.952	-0.964	-1.458	GTACTGGATGAGCGGCTACC	ATGACCTCCTCCTTGCTGAA
735	ENSG00000075702	WDR62	284403	-1.109	-1.806	-1.4575	CTGCCCACAGACAGGAATCT	CTCTCTTCCACAGGGCTAGG
736	ENSG00000170682	n.a.	n.a.	-1.492	-1.423	-1.4575	CGGAAACTGACCCTGTCCTA	ATGGCAGCTGTGAGACATTG
737	ENSG00000085185	BCORL1	63035	-1.522	-1.393	-1.4575	AACCTGCCTAAGATGCCTGA	ATCTGGCTGCCACTTGTTCT
739	ENSG00000196300	n.a.	n.a.	-1.022	-1.891	-1.4565	GGGAAATGCGAGAGTCTGAG	ACGGGGGATTGATCTCCTAA
738	ENSG00000145075	CCDC39	339829	-1.132	-1.781	-1.4565	AAGGGAGCGTGAGACTGAAA	TCCATCCCTCTTCTGCATCT
740	ENSG00000102030	ARD1A	8260	-0.792	-2.12	-1.456	CGTTATGAACATCCGCAATG	ATTTGGGCTCCACTTCACTG
741	ENSG00000117335	CD46	4179	0.112	-3.023	-1.4555	TGTCTCAGATGACGCCTGTT	TACACTCTGGAGCAGCACGA
742	ENSG00000169884	WNT10B	7480	-1.653	-1.258	-1.4555	TTCTCTCGGGATTTCTTGGA	CCACAGCCATCCAACAGG
743	ENSG00000178935	AC010645.5	79818	-2.612	-0.298	-1.455	GGGAACACATCACAAGCAGA	GGATTTCCCACATTCACACC
744	ENSG00000141510	TP53	7157	-1.378	-1.529	-1.4535	CATGAGCGCTGCTCAGATAG	AGAGGAGCTGGTGTTGTTGG
745	ENSG00000175787	ZNF169	169841	-1.879	-1.027	-1.453	GTGGGCGACACTTCAGGTAT	ACAATCAGGGCACAGGTAGG
746	ENSG00000073861	TBX21	30009	-1.759	-1.142	-1.4505	AGGATGTTTGTGGACGTGGT	AGTTCTCCCGGAATCCTTTG
747	ENSG00000136490	LIMD2	80774	-1.45	n.a.	-1.45	CTTCTGCTGCAAGCACTGTC	TGCTGGAGAAAAGGCACCTA
749	ENSG00000099817	POLR2E	5434	-0.924	-1.975	-1.4495	AAGACCATCATGCAGCTGTG	GCTCTGTCACCTCCTCCTTG
748	ENSG00000176120	n.a.	n.a.	-1.416	-1.483	-1.4495	GCCGAGTTCCCTACAACAAG	ACAATTTCCGCCTCACTGAC
750	ENSG00000163520	FBLN2	2199	-1.483	-1.415	-1.449	CTGAAGGCAACTGTGTGGAC	GCCTCACACTCATTCACGTC
752	ENSG00000105355	M6PRBP1	10226	-1.319	-1.577	-1.448	ACGTTTTCCAGCATCCACTC	TGAGGCTCAGAACAGGCTTC
751	ENSG00000174886	NDUFA11	126328	-1.717	-1.179	-1.448	TGAGCTGGGACTAGCGAAAT	TGTCCAACCTTAGCCACTCC
753	ENSG00000196380	n.a.	n.a.	-1.41	-1.485	-1.4475	TCAAAGGGGCCAACATAGAG	GCCATTCCACTCCTGTGACT
754	ENSG00000101438	SLC32A1	140679	-1.732	-1.163	-1.4475	CCTGTACGTGGTGGTGAGTG	CTTGGCCACCAGAAAGATGT
755	ENSG00000178764	ZHX2	22882	-2.541	-0.352	-1.4465	TCCCTATCCGACCACAACTC	TTGATCATCGTGGCATTTGT
756	ENSG00000132967	AC121253.1	n.a.	n.a.	-1.446	-1.446	TAAGAAGCCGAGAGGCAAAA	CTTCGCAGCCTTCTTTTCAT
757	ENSG00000099284	H2AFY2	55506	-1.228	-1.663	-1.4455	GGGATGGATTCACCATTCTG	GCTGTCGAAGAGCAGGAAGT
758	ENSG00000099385	BCL7C	9274	-1.973	-0.918	-1.4455	GCGACACTTCCCTTCGTATC	CCTCAGCTTCCAGCAGTTCT
760	ENSG00000169228	RAB24	53917	-1.14	-1.749	-1.4445	AGAGGCCGAGCATGGTTAT	GCCTGAGGAGTCCAGACTGT
759	ENSG00000108272	DHRS11	79154	-1.958	-0.931	-1.4445	CAGCACAGCGGTGTAGACAT	TCCTCGGGTTTGAGACACTT
761	ENSG00000187837	HIST1H1C	3006	-1.479	-1.409	-1.444	GGCCCCTGTAAAGAAGAAGG	TCTTCGCTTTCTTCGGTGTT
762	ENSG00000138796	HADH	3033	-1.118	-1.769	-1.4435	AGTTCGGCAAGAAGACTGGA	CCCGTTGATGAGAGAAGGAA
763	ENSG00000142449	FBN3	84467	-1.592	-1.295	-1.4435	TGTCTGTGTCACCGTGGATT	CAGTGGTCACTCTGCACCTG
764	ENSG00000110514	MADD	8567	-1.259	-1.627	-1.443	CCCTTTCTTCTCCACCTTCC	AATGCCATCACAGACATGGA
765	ENSG00000173171	MTX1	4580	-1.25	-1.635	-1.4425	CGCCTTCGTCTTCAGCTACT	GGCTGTACCAACAACGAGGA
766	ENSG00000175938	ORAI3	93129	-1.621	-1.261	-1.441	GAAGCTGTGAGCAACATCCA	TAGCGGTCTGTCTTGTGTGC
767	ENSG00000146678	IGFBP1	3484	-1.44	n.a.	-1.44	CTGCCAAACTGCAACAAGAA	GGAGCTTTGGAAGAGCAGAA
768	ENSG00000130489	SCO2	9997	-1.447	-1.432	-1.4395	ACTTCCACCTGCTGGATCAC	CAGTGGCTCAAGACAGGACA
769	ENSG00000179652	n.a.	n.a.	-1.267	-1.611	-1.439	CTAAGCGGCCTCACCAACT	GGTGTGACCACGGTGTAGAA
770	ENSG00000118526	TCF21	6943	-1.044	-1.833	-1.4385	ACCCTCTTCCTCGCTTTCTC	CCCGTTCTCGTATTTGTCGT
773	ENSG00000100316	RPL3	6122.65	-0.905	-1.971	-1.438	CCAAGTCATCCGTGTCATTG	CAGCCTTTCAGCATGACAAA
772	ENSG00000171102	OBP2B	29989	n.a.	-1.438	-1.438	GGAGGATAGGTGCATCCAGA	GTGGTCCAGGCTCTGTGTCT
771	ENSG00000100060	MFNG	4242	-0.942	-1.933	-1.4375	CCTCATCTGTGTCCCGAGTT	TGGCCTTTCCTTCATGGTAG
774	ENSG00000125877	ITPA	3704	-1.186	-1.689	-1.4375	CTCATTGGTGGGGAAGAAGA	AGGCATCTCTGCGTACGTCT
775	ENSG00000162714	ZNF496	84838	-1.588	-1.287	-1.4375	GAAGGAAACGTGAGGAGCTG	GAGAGCAGGTGGGAGTTCAG
776	ENSG00000180035	ZNF48	197407	-1.437	n.a.	-1.437	GCAAGGGTTTTGGTGACAGT	ACAGATGAGGCAGCAGGAAT
777	ENSG00000150873	C2orf50	130813	-1.114	-1.758	-1.436	ACATCAGCTGGGTACCGATT	AGTCCATGCGGATGAGAGTC
779	ENSG00000174165	ZDHHC24	254359	-1.453	-1.419	-1.436	TGCTCACAGGCAGAGTGTCT	CCCTGGACACGTAGGAGTGT
778	ENSG00000059691	PET112L	5188	-1.896	-0.976	-1.436	TGCAGGCTACCAAATTACCC	CAGGAACCTGATGCTGTTGA
781	ENSG00000187570	n.a.	n.a.	-0.94	-1.931	-1.4355	GAGGGGAGGAAATTGGAGAC	AGGTTTCAGGGTCTGGTCCT
780	ENSG00000174171	AC020659.5-1	n.a.	-1.086	-1.784	-1.435	ACAGGTTCCGGATCTTGATG	CTCCTCATCCCCAAAGTCTG
782	ENSG00000131043	C20orf4	25980	-1.122	-1.745	-1.4335	GTCAGAAGCAGCCATGATGA	AAAGGGAATTCTGGCTCCAT
783	ENSG00000112195	TREML2	79865	-1.433	n.a.	-1.433	CTGCCTCCAAGACAGGCTAC	TTCCACATAGGGCTCTGGTC
784	ENSG00000196495	n.a.	n.a.	-1.433	n.a.	-1.433	ATGGAGCTGGATTCAGAGGA	CTTCCTGCAGCTGGTCTAGG
785	ENSG00000125637	PSD4	23550	-1.391	-1.474	-1.4325	GTCCAGCCTGACATTCACCT	CCAATGTTCTGTCCATGCAG
786	ENSG00000198487	n.a.	n.a.	-2.223	-0.64	-1.4315	ACTCTTCGGGAAGAAGCACA	CCATATTGTCCAGGCCTCAG
788	ENSG00000167625	ZNF526	116115	-0.668	-2.193	-1.4305	GGATCACGGAAGACTGAAGC	TCCCAGCACTGGTATTGGAT
790	ENSG00000197496	SLC2A10	81031	n.a.	-1.43	-1.43	TCTGCAACAGCTTCAACTGG	CATCCTTTTTACCCCAGCAA
789	ENSG00000166439	RNF169	254225	-1.837	-1.023	-1.43	GTTGTCCTGCACGTCTCTCA	AGACAATGGGCTTGAAATGG
791	ENSG00000159720	ATP6V0D1	9114	-2.465	-0.395	-1.43	TACAATGCCATTCTGGTGGA	GTCCTCCAGCGTCTTGTCTC
787	ENSG00000164318	EGFLAM	133584	-1.43	n.a.	-1.43	GCTCGTGGGCTGTATCTCTC	CAGGCTCTGGAATTTGCATT
793	ENSG00000181404	XXyac-YRM2039.2	n.a.	-0.996	-1.863	-1.4295	TGCCTGAGATTGATGTTCCA	CTCCTTCTGCTGCTGCTTCT
792	ENSG00000186564	FOXD2	2306	-1.232	-1.627	-1.4295	CAGGCGACTTCCTCTCAAAG	TGTAGCAAGGCTGTGTGACC
794	ENSG00000145703	IQGAP2	10788	-0.958	-1.899	-1.4285	GGCTTCCATTGAGAACCTGA	TCTTCTGGCTCAGGGACATT
795	ENSG00000174937	OR5M3	219482	-1.517	-1.34	-1.4285	TCGGCATGATGGTGTTAATC	CACAGGCCATTTTGATGAGA
796	ENSG00000125447	GGA3	23163	n.a.	-1.428	-1.428	CCTGCCAGAAGAAGCAAAGA	AAGTCCGCCTCTTGTTCTCA
797	ENSG00000162946	DISC1	27185	-1.433	-1.422	-1.4275	TGCAGCCATGGATAGTTCTG	AGAATGCATGTCACGCTCTG
799	ENSG00000188774	n.a.	n.a.	-0.246	-2.604	-1.425	AGCCTGCGAAAGTACAAGGA	CCCATAGCTGCCTACCATGT
798	ENSG00000173769	RP11-424N24.1	375337	-1.448	-1.402	-1.425	GCTTCCTTGCCAGAATCAAG	GCTTCCTGACCATCTTTGGA
800	ENSG00000167969	DCI	1632	-1.645	-1.204	-1.4245	GACAACCCCAGGTACTGCAT	AGCCCAATCGTTAGCCTTTT
803	ENSG00000171720	HDAC3	8841	-1.328	-1.52	-1.424	GAGCTGACTCTCTGGGCTGT	CAGCCTCATCAGTCCTGTCA
801	ENSG00000148288	GBGT1	26301	n.a.	-1.424	-1.424	GCTGCCAGTCTCCTATGTCC	CATGGATGTCTCCTCCCAGT
802	ENSG00000136872	ALDOB	229	-1.459	-1.389	-1.424	GATCGTGGTGGGAATCAAGT	TTGGTAGAGGGCAAAGGTTG
805	ENSG00000160224	AIRE	326	-1.344	-1.503	-1.4235	GATCCTGCTCAGGAGACGTG	GAAGTGGGGCAGGGTTTAAT
804	ENSG00000109103	UNC119	9094	-1.951	-0.896	-1.4235	CACCCGTATGAGACCCAGTC	CAGCCTTGATAGGGGAACAC
806	ENSG00000132470	ITGB4	3691	-0.868	-1.978	-1.423	GTGGTCATGGAGAGCAGCTT	CCGGAACTCATCCACATCTT
807	ENSG00000118733	OLFM3	118427	-2.33	-0.513	-1.4215	GCACAGTTGTTGCTCCAGAA	TAGGCACCAATTTCCTCCTG
808	ENSG00000143374	TARS2	80222	-1.762	-1.08	-1.421	CAGCTCCCAGAGTGACGATT	AATTCCTTCAGGGCCTGTTT
809	ENSG00000149806	FAU	2197	-0.95	-1.892	-1.421	AGTCGCCAATATGCAGCTCT	CCTTCTTCTTGCCAAAGGTG
811	ENSG00000187778	MCRS1	10445	-1.446	-1.393	-1.4195	AGCTCAAGGACATGCGAGAT	GCGATCTCCACCACAGAGTT
810	ENSG00000130811	EIF3G	8666	-1.669	-1.17	-1.4195	GCGATGCCTACTGGAGACTT	GCAGTTCAGGTCCTCTTTGC
812	ENSG00000101955	SRPX	8406	-0.919	-1.919	-1.419	GCAAACAAAAGCGATGTCCT	TGCAAGTGCCCTTATTCTCA
813	ENSG00000161526	SAP30BP	29115	-1.543	-1.295	-1.419	AACTCGTGGCCTCCTTTTCT	CGAATCCCACTTGCTCTTTC
814	ENSG00000110328	GALNTL4	374378	-1.655	-1.181	-1.418	CTCTCAGGGTGGCTGAAGTC	GCTTAGACTTGCGGTTCTGG
815	ENSG00000177186	OR2M7	391196	n.a.	-1.418	-1.418	CCCAAGATGGCCTTCAACTA	TGATGATTGCAACAGGGAAA
816	ENSG00000100350	FOXRED2	80020	-1.544	-1.287	-1.4155	GGTCAGCCCTGCTTATCATC	TAAGACGCCTGATGGGAAAG
818	ENSG00000128594	LRRC4	64101	-1.85	-0.979	-1.4145	GAGATCTCGCCTGAGGACAC	TGAATTGTGGGCAGCACTAC
817	ENSG00000166592	RRAD	6236	-0.889	-1.94	-1.4145	GGGGATGCCTATGTCATTGT	TGGGACCTAGAGAACCGAGA
819	ENSG00000146147	C6orf142	90523	-1.711	-1.117	-1.414	AACTGACGGTCTCTGCTGGT	GACCAGACTGGACGAGATAGC
820	ENSG00000162490	C1orf187	374946	-1.134	-1.693	-1.4135	CTTGTTCGACTGGACCGATT	GGCTTGTGCAAACCTCCTG
821	ENSG00000110871	COQ5	84274	-1.338	-1.489	-1.4135	GCTGGACTTGCATGGGTATT	CAGAATGAATGGCCACAATG
822	ENSG00000131242	RAB11FIP4	84440	-0.789	-2.037	-1.413	ATGAGACCAGGACCAACGTC	TTGCTTCAGCTTGCTCTTCA
823	ENSG00000162076	FLYWCH2	114984	-1.369	-1.456	-1.4125	TTGCCTGGGAGTAGGAGAAA	CCGCTGCTAATCCACTGTCT
826	ENSG00000196668	NCRNA00173	n.a.	-1.48	-1.338	-1.409	AACGAAGGCCAGAAAGAACA	ATCCCTGACAGACACCCTTG
825	ENSG00000143786	CNIH3	149111	-1.55	-1.268	-1.409	TCTCGACACACGTTTTCCTG	TTTCGCAGAAGGAAGCAGAT
824	ENSG00000177108	ZDHHC22	283576	-1.409	n.a.	-1.409	GTGCTGCAGCTCTTCCTCTT	TCTTTCCGAAGACCATGGAG
827	ENSG00000111671	n.a.	n.a.	-1.065	-1.753	-1.409	GGGGAAGCTGTACCATCAGA	CCTTTCTTCCTCCCTCCAAG
828	ENSG00000145491	ROPN1L	83853	-0.581	-2.235	-1.408	GCGGGCTATTTTTCAGCTC	CTGGCCAAGTAGCGGTAAAC
829	ENSG00000100010	n.a.	n.a.	-1.381	-1.435	-1.408	GGTTTGAGCTGGACAGAAGC	AGGTGTCCCTGGTACTGCAC
831	ENSG00000148362	C9orf142	286257	-1.99	-0.826	-1.408	ACTCTGCAGGAGGACAGAGC	TGAGGAGCCGTGTTAGTCCT
830	ENSG00000183688	FAM101B	359845	-2.033	-0.783	-1.408	GCGAAGGAGTGGAGTTTGAC	GCATTCATCAGAGAGGTCGTC
832	ENSG00000141934	PPAP2C	8612	-0.833	-1.978	-1.4055	ACAGACCGGCTCTATTCTCG	CGCTCCAGTGGTGTTTGTAA
833	ENSG00000171425	ZNF581	51545	-1.341	-1.47	-1.4055	TCACCCACTCGGAGGTAAAG	TCTGTGTAGGGGCTCATTCC
834	ENSG00000129862	VCY	9084,353513,652821	-1.323	-1.486	-1.4045	GAAGGGAGAAGCAGTTCGTG	TCGGTTTGCAACACATTCAT
836	ENSG00000176303	n.a.	n.a.	-0.9	-1.908	-1.404	TGTCCGGTGTCATAGAACCA	GGAGACAAGATTGCCCAAAA
835	ENSG00000125170	DOK4	55715	-1.404	n.a.	-1.404	CAGATGAGAAGTCGGTGTGC	AAGGTAAAGCGTGTGGCATC
837	ENSG00000089094	KDM2B	84678	-1.628	-1.179	-1.4035	ATGCCTGACCCTGATTTCAC	GTTGGAGGAATCAGCCAAAA
838	ENSG00000184831	APOO	79135	-1.518	-1.287	-1.4025	CCCAAGATGCAAAGTTTGGT	AGGTGAAGGGATTCCAGGTT
839	ENSG00000100425	BRD1	23774	-1.59	-1.214	-1.402	CCTACGCTCAAGCTCAAAGG	CAGGCATAGTCCTCCTCGTC
840	ENSG00000139540	SLC39A5	283375	-1.331	-1.472	-1.4015	CTCGTCAGTTTGCTCTGCTG	GCGTGTTTCGAGATTCCTTC
841	ENSG00000164050	PLXNB1	5364	-1.807	-0.995	-1.401	GTTCGTGGATGACCTGTTCC	TCCGGAGTAGTTCCAGGACA
842	ENSG00000185909	KLHDC8B	200942	-1.821	-0.981	-1.401	GGGTTGCAACTGTGGAGAGA	GCTCCAGGTCAAACATCTCC
843	ENSG00000100418	PPPDE2	27351	-2	-0.8	-1.4	CCGAATCTCTATCCGGTGAA	GGCAGTCCTGTTAGCTCTGG
845	ENSG00000184943	n.a.	n.a.	-0.851	-1.945	-1.398	TGGGAATGGAGGGAAATAAA	ACCAGCCCATGACCAAAATA
844	ENSG00000108561	C1QBP	708	-2.077	-0.719	-1.398	TAACAACAGCATCCCACCAA	AGCCTGCCATGAAACTATGG
846	ENSG00000139737	SLAIN1	122060	-2.172	-0.623	-1.3975	TCACCGTGCGAAATAGTCAG	TCTCCAATTTCCATCCCTCA
847	ENSG00000166986	MARS	4141	-0.609	-2.184	-1.3965	TGCTCATCAGCACTGTAGGC	GTAGGCGGGATCTTGCAGTA
848	ENSG00000142025	DMRTC2	63946	-2.048	-0.744	-1.396	GCTTGCGAGTGTCACAAATG	GGCAGAGAGACAGCAGGTTC
849	ENSG00000166928	MS4A14	84689	-2.453	-0.338	-1.3955	CTCTATCAGCGCATGCCATA	CCTTTGGCTTGCTGATCTTC
850	ENSG00000185128	TBC1D3	84218	-0.478	-2.312	-1.395	TGGTTCCGCCATTATGATTT	ATCTGGGGTCTGGTGTGTTC
851	ENSG00000168273	AC112215.3-1	440957	-1.41	-1.379	-1.3945	GTGCGCCTACCAGACAGTG	TCATCTTCCAGCCTTCTCTGA
853	ENSG00000111057	KRT18P19	3875	-1.445	-1.343	-1.394	CACAGTCTGCTGAGGTTGGA	TCAGACACCACTTTGCCATC
852	ENSG00000142347	MYO1F	4542	-0.806	-1.981	-1.3935	TCCGGAAGTACGAGGAGATG	TGCACAGAAGGCTGACAAAC
854	ENSG00000178385	PLEKHM3	389072	-1.597	-1.189	-1.393	ACAACGTGGACGTGTGTCTG	GGCTGAAAATCTGCTTCATACC
855	ENSG00000077157	PPP1R12B	4660	-2.2	-0.585	-1.3925	GGAGCTCATGGAGAAATGGA	TCAGACCTGCTTTGAAGGAAA
860	ENSG00000145708	CRHBP	1393	-0.905	-1.877	-1.391	GGATTCTCAAGGGGGAGAAG	AAGGGTCCAATCCAGTTCCT
859	ENSG00000123810	B9D2	80776	-1.221	-1.561	-1.391	ATCGCGGCTTACATATCTCG	ACATGGCAAAATCCATAGCC
857	ENSG00000183337	BCOR	54880	-1.382	-1.4	-1.391	TATGCCAGGATCTCCACCTC	AGCACAACCATTTCCTGGAG
858	ENSG00000178538	CA8	767	-1.646	-1.136	-1.391	GGAACATGTTGGCTTGAAGG	GGTGCAGCTCAAAAGTTTCC
856	ENSG00000183963	SMTN	6525	-2.671	-0.111	-1.391	CGCTGAGGAGCTGATGACTA	TTGGATGAGGAGGAAGAGGA
861	ENSG00000047617	ANO2	57101	-1.757	-1.024	-1.3905	CCCAGCAGAGAGATGTGTGA	GAAACGATCCTTCCAGGTCA
862	ENSG00000088205	DDX18	8886	-1.928	-0.853	-1.3905	AATGCAGATTCGGGAACACT	AGGCACCTTGAAACCAAATG
863	ENSG00000116754	SFRS11	9295	-1.758	-1.021	-1.3895	TGCCAGTCTCATCTCGTGTC	CGAGACCAGCAGCTACATGA
864	ENSG00000128789	TNFSF5IP1	56984	-0.609	-2.169	-1.389	TTGCCTTCAAGAAAGCTGGT	TTCAGCAGAACTGCCATTTG
865	ENSG00000133302	ANKRD32	84250	-1.108	-1.668	-1.388	GGGTGACTCCTTTGCATGAT	TCAGTGTGTACCCCAGGACA
869	ENSG00000162390	ACOT11	26027	-0.668	-2.107	-1.3875	CTCAAAGCCATCGTGAACAA	GTGTACAGGCGGACCTGACT
872	ENSG00000169813	HNRNPF	3185	-2.531	-0.244	-1.3875	CTCTGTTGAGGACGTGCAGA	CTAACTCCTGCGAGGCAAAC
871	ENSG00000143412	ANXA9	8416	-1.01	-1.765	-1.3875	GACGTGGCCATTGAAATTCT	CTTGATCACCGAAGCTAGGC
867	ENSG00000181965	NEUROG1	4762	-1.501	-1.274	-1.3875	AGGACGACGAGCAGGAGAG	TGTGTGGAGCAAGTCTTTGG
866	ENSG00000171017	LRRC8E	80131	-1.654	-1.121	-1.3875	TTGGACCTGCAGCAATACAG	CTTGCTCACCCTCCTTCTTG
868	ENSG00000026036	RTEL1	8771.52	-1.831	-0.944	-1.3875	AACCCACACATCATCGACAA	GGCCATTCGTGTCTGAGAAG
873	ENSG00000167173	C15orf39	56905	-1.08	-1.694	-1.387	CACTCTCCACCCTTCCCTTC	CTGTCCCAGAGAGGAAGCAG
870	ENSG00000185559	DLK1	8788	-1.124	-1.65	-1.387	AAATGGATTCTGCGAGGATG	GCAGAAATTGCCTGAGAAGC
874	ENSG00000196456	ZNF775	285971	-2.333	-0.44	-1.3865	CCAGGATTGCTGGCTCTTAG	CTGGTGCTGGGAATATGCTT
876	ENSG00000135245	C7orf68	29923	-1.483	-1.288	-1.3855	AGGCAGCTCTGTTTCTCTGC	TCTGGTTACAACGGTGCTCA
875	ENSG00000162399	BSND	7809	-1.571	-1.2	-1.3855	CCAATGCATCTCCACATGAC	GCCACCATCTCATTGAACCT
877	ENSG00000130643	DRD1IP	50632	-1.118	-1.651	-1.3845	AAGGACTGCCATCCACCAT	GGGGTCCATCTCCGTGTAGT
878	ENSG00000177984	LCN15	389812	-1.922	-0.846	-1.384	AAGGACCACCTGTCCATGTC	GAAAGAGACGTCCCACAAGG
879	ENSG00000197499	n.a.	n.a.	-1.187	-1.58	-1.3835	GCTCCCACTCCATGAGGTAT	CCAGGTAGGCTCTCAACTGC
881	ENSG00000124074	C16orf48	84080	-1.533	-1.234	-1.3835	AGCGCTTCAGAGAACAGGAG	CAGCTTGGTCAGTGTTTCCA
880	ENSG00000021574	SPAST	6683	-1.48	-1.286	-1.383	GCGTCAGCCCTCAAACTTTA	CCTGGAATACTTTCATCTGCAAC
882	ENSG00000102119	EMD	2010	-2.889	0.123	-1.383	CTTTCGGATACCGAGCTGAC	TGATGCTCTGGTAGGCACTG
883	ENSG00000171703	TCEA2	6919	-1.81	-0.955	-1.3825	AAGAACCGTGTACGGAGTCG	GGGTCTCCAGAGAAGCTGTG
884	ENSG00000133131	MORC4	79710	-2.353	-0.41	-1.3815	TCCATCCATGTTACCTGCAA	GGAGCCTTCTTCGTTTCTCC
885	ENSG00000183087	GAS6	2621,732446	-1.419	-1.344	-1.3815	ATCAAGGTCAACAGGGATGC	ACCAGTGCCACAGAGAGAGG
886	ENSG00000141562	NARF	26502	-1.362	-1.399	-1.3805	GGATTATTTCGCCAGACAGC	AGCAAAGCGTAACACCACCT
888	ENSG00000126883	NUP214	8021	-1.32	-1.439	-1.3795	TAAGCCATCTGGGCCTACAC	GGTGGTGGAAAGAGCAGTTC
887	ENSG00000196549	MME	4311	-1.474	-1.285	-1.3795	CCATCGATGAAAACCAGCTT	TGTACCATAAAGGGCCTTGC
889	ENSG00000167208	SNX20	124460	-1.4	-1.358	-1.379	AACACAATGAAACCGATCACTG	TACGGGTTGAAAGCCAAGAG
890	ENSG00000168930	TRIM49	57093	-2.474	-0.284	-1.379	GCATGGGGTGTTCAGACTTT	TTCCTGGGATAAAGGGGTTC
891	ENSG00000198211	TUBB3	4157,10381	-1.086	-1.67	-1.378	CATTCTGGTGGACCTGGAAC	CTCGTTGTCGATGCAGTAGG
892	ENSG00000164743	C8orf48	157773	-1.88	-0.876	-1.378	CCCGTATTGGAGAAGCACAT	CTGGCCCAAACTACCAACAT
893	ENSG00000179178	n.a.	n.a.	-1.587	-1.167	-1.377	CAGCTGAGGCCATGTGAGTA	GCTCATCAGCTGTTTCACCA
894	ENSG00000138386	NAB1	4664	-1.161	-1.592	-1.3765	AGCACTGCAGAGTGTTGGTG	TCAGCAGGGCATTATCCTTC
895	ENSG00000129514	FOXA1	3169	-1.194	-1.558	-1.376	GACTCCAGCCTCCTCAACTG	ATGGCTATGCCAGACAAACC
897	ENSG00000187048	CYP4A11	1579	-1.228	-1.524	-1.376	CATCCTGAAGCCCTATGTGG	CCAAATGCCTCTTCCTCTTG
896	ENSG00000165775	FUNDC2	65991	-1.468	-1.284	-1.376	AAGCCAAAGAGCAGCTGAAG	AGTGTCTTGCATGGGGGTAA
898	ENSG00000183608	n.a.	n.a.	-1.362	-1.389	-1.3755	TCACCCCTGGATCATAGGTC	TGAAGATCCCCTGTTCCTTG
899	ENSG00000172409	CLP1	10978	0.237	-2.987	-1.375	TAAATTCTGCACGGGAGGAC	GGACCTCGCTCTTCTTCCTT
900	ENSG00000158062	UBXN11	91544	-1.813	-0.936	-1.3745	GAGCTGGTGGTAGAGGGTGA	CAGCAGTTCTGCAAGGTGTC
901	ENSG00000141971	FAM125A	93343	-0.952	-1.797	-1.3745	AGATCGTGGTGGACAAGAGC	CATGGCTGAGATGCCATAGA
902	ENSG00000172482	AGXT	189	-1.063	-1.685	-1.374	AGGCATCCAGTACGTGTTCC	CCCGAGTACAGGATGTCGAT
903	ENSG00000135486	HNRPA1L3	3178.65	-1.262	-1.486	-1.374	AAAGCCCTGTCAAAGCAAGA	GTAGCTTCCACCACCTCCAA
904	ENSG00000186625	KATNA1	11104	-0.887	-1.859	-1.373	GACAGCACTCCCTTGAAAGC	CGAACAGCTTTCCCTCTGTC
905	ENSG00000146463	ZMYM4	9202	-1.391	-1.355	-1.373	CCAGTTCCCGTACCAGTGTT	CTGAATCAGCCTCTTGCACA
906	ENSG00000136848	DAB2IP	153090	-1.467	-1.277	-1.372	TGCCCATGGAGATGTACAAA	CCGTGGGAAGACACAGTAGG
907	ENSG00000128564	VGF	7425	n.a.	-1.371	-1.371	GACCCTCCTCTCCACCTCTC	GTCTCGGTCAGCAGAGCTTC
908	ENSG00000178394	HTR1A	3350	-1.046	-1.694	-1.37	GGCGGCAACACTACTGGTAT	CAGCGGGATGTAGAAAGCTC
911	ENSG00000184110	EIF3S8	8663	-1.921	-0.813	-1.367	GTGCCTGGAAGAGTTTGAGC	AGTCGGAATCGGAAGATGTG
910	ENSG00000109758	HGFAC	3083	-2.099	-0.635	-1.367	CTGATCCGGCTGAAGAAGAA	TATCCGGTCGTTGATCCAGT
909	ENSG00000197060	n.a.	n.a.	-1.367	n.a.	-1.367	TCCTGCTGCTCTGGTTCC	TGTTGACAGTAATAAGTTGCAAAATC
912	ENSG00000183929	n.a.	n.a.	-1.111	-1.621	-1.366	CCTGGCTCACTCAACATCAA	AGGAACTTGCACTTGGATGC
913	ENSG00000125618	PAX8	7849	-1.26	-1.47	-1.365	AGCAAGATCCTTGGCAGGTA	CTGCTGCTGCTCTGTGAGTC
914	ENSG00000181903	OR4C6	219432	-1.867	-0.863	-1.365	AGACACCCTCTCCAAGAGCA	TCAGGGAGCATAGGATGACC
915	ENSG00000183527	PSMG1	8624	-1.042	-1.685	-1.3635	CAGCCTTCCTTCTCCTTTCC	CAAACCCTTCAAGCTTCTGG
916	ENSG00000172348	RCAN2	10231	-1.109	-1.618	-1.3635	CAAAAGGGCTAGGAAAAGGTG	GATAGGACATGGCTGGATGC
918	ENSG00000139193	CD27	939	-1.096	-1.63	-1.363	CCAGCATAGAAAGGCTGCTC	TCCTTCGTTGATGGAGGAAC
917	ENSG00000129195	FAM64A	54478	-1.395	-1.331	-1.363	CTGAGAGCCGTCAACCTCA	TTGGGACAGCTTCTGGAGAT
919	ENSG00000111344	RASAL1	8437	-1.442	-1.282	-1.362	TTCTCTCCAAAGACCCTCCA	GGCTAATCACAGGCTTCAGG
920	ENSG00000171611	PTCRA	171558	-0.769	-1.954	-1.3615	CCGGTACATGGCTGCTACTT	GCAGGTCCTGGCTGTAGAAG
922	ENSG00000134690	CDCA8	55143	-1.806	-0.913	-1.3595	AAAAGGTCAAGCCGTGCTAA	CCCAGAAGTGCCCATTAAAA
921	ENSG00000188186	C7orf59	389541	-1.823	-0.896	-1.3595	CAGCTCGGCTACCTGGTACT	GGCCCTAGTTCTAGCAGCAA
923	ENSG00000185955	C7orf61	402573	-1.233	-1.484	-1.3585	TGCTTGAAGCTCACAGGAGA	TGAGCGTGGAGACAGACTTG
924	ENSG00000126882	FAM78A	286336	-1.428	-1.289	-1.3585	CCGCTGAAAACAAAACTCAGA	TACATAAGGCCGCATGACAG
925	ENSG00000161944	ASGR2	433	-1.268	-1.448	-1.358	CTGGGAGGAGCAGAAATTCA	TCCAGGGTCAGGGACTCTTA
926	ENSG00000103549	RNF40	9810	-1.508	-1.207	-1.3575	TGCCTACTGGCTCACAAATG	TAAGGCCACCAGGATGAAAG
928	ENSG00000119866	BCL11A	53335	-0.857	-1.857	-1.357	CCCTTCAGGACTAGGTGCAG	CAGAACTCGCATGACTTGGA
927	ENSG00000111667	USP5	8078	-1.982	-0.732	-1.357	CACCCAGCGAGTTGACTACA	GGAGTCTTCGTCTTCGTTGC
929	ENSG00000172586	CHCHD1	118487	-1.704	-1.009	-1.3565	TGCTGAAGCCCAATAAACCT	TGCCTCTTCTACCCTCCAAA
931	ENSG00000163694	RBM47	54502	-1.059	-1.653	-1.356	AAAGGGCACTGCAAAAATTG	ACCAGCTCGTCCTCGTACAC
930	ENSG00000108622	ICAM2	3384	-1.137	-1.575	-1.356	CAAACATCTCCCATGACACG	GAGCAGGACAGATGTCACGA
932	ENSG00000100031	GGT1	2678.73	-1.033	-1.677	-1.355	GCTGCCTGATCAGAGAGTCC	TGACCTCAGCTTTTCGTGTG
933	ENSG00000057294	PKP2	5318	-1.327	-1.383	-1.355	ATCAGAGCTCCTTCCACAGC	GCCGAGGTACCCCATTTAGT
935	ENSG00000140451	C15orf20	80119	-1.354	n.a.	-1.354	CAGCCTCAGACCAGGAGAAC	CCTGTCTTCATTGCCTCTCC
934	ENSG00000078808	SDF4	51150	-1.473	-1.234	-1.3535	CGAGAGAGAGTAGCCAACAGG	GCAACCTCCTTCTCGCTATG
937	ENSG00000124212	PTGIS	5740	-0.279	-2.427	-1.353	GCTCCTGCTCTTCCTTCTCA	TGCTGTTGACCGCATAACTC
936	ENSG00000185513	L3MBTL	26013	-1.399	-1.307	-1.353	GGGACCTTGTGTGCTCAGAT	CACAATGGCTCTGCAAGGTA
938	ENSG00000159263	SIM2	6493	-1.659	-1.046	-1.3525	GCTCACGGGCAACAGTATTT	CGTGCACGTGATGGTATAGG
939	ENSG00000105971	CAV2	858	-1.041	-1.663	-1.352	TGTACGAGCGTAGGACGATG	TCATTTTTAATGGGAAGTTGTGC
940	ENSG00000107829	FBXW4	6468	-1.804	-0.899	-1.3515	AGTGTCCCAGTGAAGGAACG	CCACTGTTGAGGTCCCAGAT
941	ENSG00000172731	LRRC20	55222	-0.678	-2.024	-1.351	ACCTCCCACCTTCTCCTCAT	TCATCCTGAAAACCCTTTGC
942	ENSG00000110721	CHKA	1119	-1.147	-1.555	-1.351	GTTTGCCCTTGCATCTCATT	TGCTGTTTGCCTCATCTGAC
944	ENSG00000144567	FAM134A	79137	-0.69	-2.009	-1.3495	TGTGCAGATACCTGGCTGAG	TCCAAATCCTCGGAGACATC
943	ENSG00000145220	LYAR	55646	-0.73	-1.968	-1.349	TGCCTTTCTTGCATTGACTG	ACTTTGGAGGCTGGAACCTT
945	ENSG00000163739	CXCL1	2919	-1.349	n.a.	-1.349	CTCTTCCGCTCCTCTCACAG	TGTTCAGCATCTTTTCGATGA
946	ENSG00000031698	SARS	6301	-2.045	-0.652	-1.3485	GGTGCTGGATCTGGATTTGT	ATGGGTACAGAAGGGTGCAG
947	ENSG00000173868	PHOSPHO1	162466	-1.469	-1.227	-1.348	TACAGGTGGTGCTCACGGTA	TTGGCATCGGAGATGAGAAT
948	ENSG00000131626	PPFIA1	8500	-2.263	-0.433	-1.348	GCATTTGGAATGCCTTGTCT	TTGGCTCTGTTCCCTTGACT
949	ENSG00000177504	VCX2	51480	-1.575	-1.12	-1.3475	TCATGGCATCCAAGAAGTGA	GCGTCTCCCTCTACGAACTG
950	ENSG00000103742	IGDCC4	57722	-0.829	-1.865	-1.347	ACAGGCACTGAGGTTCTGGT	TGAATCAATGCCTTAGCTTAACA
951	ENSG00000166301	n.a.	n.a.	-1.413	-1.281	-1.347	TTGGATGCCCATGGAATTAT	ATGAGGTCGTGCACATGGTA
952	ENSG00000159761	C16orf86	388284	-1.698	-0.996	-1.347	TCTGCCAAACAGCACAAAAA	TCAGCATCTTGTCGATGTCC
953	ENSG00000106459	NRF1	4899	-0.874	-1.818	-1.346	GAGTGACCCAAACCGAACAT	GCACCACATTCTCCAAAGGT
954	ENSG00000095970	TREM2	54209	-1.106	-1.586	-1.346	GCAGTTCAAGGGAAAGACGA	GACCTTCCTGAGGGTGTCAG
955	ENSG00000064703	DDX20	11218	-1.062	-1.629	-1.3455	TCTTCCCAGAGCAAAGGAAA	TGTGATAAGCTGCCATCCAA
956	ENSG00000175265	GOLGA8A	23015	-1.544	-1.147	-1.3455	AAGCAGCAGTCCTGAACTCG	ATCTGCTCCCGTATGGACTG
957	ENSG00000066926	FECH	2235	-1.134	-1.555	-1.3445	AACGCTGTATGAGCTGGACA	CCATCAAGAGTCCAATCCTCA
958	ENSG00000108179	PPIF	10105	-1.121	-1.567	-1.344	GCTCCCAGTTCTTCATCTGC	TCACCATCACCATGTCCAAG
959	ENSG00000101280	ANGPT4	51378	-1.603	-1.085	-1.344	TCTGTGACCTGCAGAGCAGT	CCACCCTCCAGACATCACTT
960	ENSG00000105479	CCDC114	93233	-0.702	-1.985	-1.3435	GTCCTGGAGAAGCGTGAAAA	GCTGGATATCAGCCTTGAGC
961	ENSG00000165501	PPIL5	122769	n.a.	-1.343	-1.343	GTGCTAAGACAGCCCGAGTC	GAGGCTCCTTTAACCGAACA
962	ENSG00000169905	TOR1AIP2	163590	-0.952	-1.733	-1.3425	CTTCCTGTGGCAGAGAGGAC	TTGAAGGAGGTGGGAGTGTC
963	ENSG00000132141	CCT6B	10693	-0.393	-2.291	-1.342	GGTCCTAAAGGCACCATGAA	GCCAAAACAGAATCCACCAC
964	ENSG00000115392	FANCL	55120	-1.188	-1.494	-1.341	CGGTCGAAAACCGTGTATG	AAGGAGCTCTGAGGTGTCCA
965	ENSG00000165185	KIAA1958	158405	-0.871	-1.81	-1.3405	GGGTATCTCTGGCTTCACCA	ATTTGGGCTTACTGCACTGG
967	ENSG00000124126	PREX1	57580	-0.727	-1.953	-1.34	GAAGATGGGACAGCGGATTA	TCTTGAACTGGTGCTTGTCG
966	ENSG00000169087	HSPBAP1	79663	-1.429	-1.251	-1.34	GCACGACACTGGAATGCTAA	GAGATGCCATCGTTTCCTTC
968	ENSG00000112367	FIG4	9896	-0.199	-2.48	-1.3395	AATCGCCAAGAGAGCTTTGA	AGAGCCAAACCTCTGGAACA
969	ENSG00000173762	CD7	924	-1.745	-0.933	-1.339	CACTACGGACAGACGGTTCC	GCCACGAGCACAGTTTCTTT
970	ENSG00000124104	SNX21	90203	-1.11	-1.567	-1.3385	CATCAAGGAGGTGCTGGACT	ACTGGAGTGGCTGGCTTTTA
972	ENSG00000061273	HDAC7	51564	-1.357	-1.32	-1.3385	GAGCTTCATTCCTCCAATGC	AAGCAGCCAGGTACTCAGGA
971	ENSG00000104529	EEF1D	1936	-1.364	-1.313	-1.3385	AGCAGAGGATGACGAGGATG	CGTACACACACTCAGGCTTCA
974	ENSG00000162366	PDZK1IP1	10158	-1.334	-1.342	-1.338	AGTCCTGGTGGGAACAGATG	GTTATGGGGAAGGACGTGTG
973	ENSG00000171236	LRG1	116844	-1.418	-1.258	-1.338	CCATCTCCTGTCAACCACCT	GCAAGGTCTCCAACTGGTTC
976	ENSG00000138107	ACTR1A	10121	-1.893	-0.782	-1.3375	ATCCATAAACCCCCAAAAGG	TTCCTTTTTGGAGACCCACA
975	ENSG00000185359	HGS	9146	-1.915	-0.76	-1.3375	GGAGGTCATGGAATCTGTGG	GGGATGGTGGAGTACTTGGA
977	ENSG00000095397	DFNB31	25861	-1.265	-1.409	-1.337	CGAGGCCTTCAAGACTAAGG	TCACTTTGGACAAAGGCTCA
978	ENSG00000161920	MED11	400569	-2.008	-0.666	-1.337	CCTGGCGAACGAGAGACTAC	CTGGAGAGGCCAAAGCATAG
979	ENSG00000133985	TTC9	23508	-2.442	-0.231	-1.3365	GGAAGGGGAGAACTTCAAGG	TCTCAGTCGCTGACCTGCTA
980	ENSG00000160688	FLAD1	80308	-2.253	-0.419	-1.336	AGGGACACACTCAGGACACC	AAAGGTTGACCAGTGCAAGG
981	ENSG00000178498	DTX3	196403	-1.503	-1.166	-1.3345	TGTCTGACTGGGAAGGGAGT	CACAGGGGTCAGAGAAGAGC
982	ENSG00000112592	TBP	6908	-0.717	-1.951	-1.334	TATAATCCCAAGCGGTTTGC	GGAGGCAAGGGTACATGAGA
984	ENSG00000157933	SKI	6497	-1.418	-1.25	-1.334	TAAGAGCCTGGGCTGTGTTC	GAAGAGAGCGAGGACAAGGA
983	ENSG00000131885	KRT17P1	n.a.	-1.622	-1.046	-1.334	CGACACTGAGCTGGAGGTAA	GCCCATCTCCACATTGATCT
985	ENSG00000105088	OLFM2	93145	-0.749	-1.917	-1.333	CCCTGGGAGACTTCATCAAA	GTAGAGCACACCGCAGATCA
986	ENSG00000138684	IL21	59067	-1.25	-1.415	-1.3325	GGCAACATGGAGAGGATTGT	AGGAATCTTCACTTCCGTGTG
988	ENSG00000177494	ZBED2	79413	-1.5	-1.165	-1.3325	ATGAAGGCAAAAGGGGACTT	TTCCCTCCTAAGCACCTCCT
989	ENSG00000188386	PPP3R2	5535	-1.74	-0.924	-1.332	TGCTCCCACTTTGACAATGA	CCACAGCACTGAATTCCTCA
990	ENSG00000167508	MVD	4597	-2.399	-0.265	-1.332	AGCGCTGAGAAGAAGCTGAC	CAGAAACGTGTCTCCATTCG
987	ENSG00000141570	CBX8	57332	-1.434	-1.23	-1.332	TGCTTTTCTGCTCCTGGAAG	ACAAACCCATGTTTCGAAGG
991	ENSG00000168672	FAM84B	157638	-1.402	-1.26	-1.331	GTGCAAATGACCCTGGAGTT	TTCTCGGGCGTGTAGGTACT
992	ENSG00000151366	NDUFC2	4718	n.a.	-1.33	-1.33	CGGAACCCAGAACCCTTAC	CCATCAAATTCAGAAACAGCA
993	ENSG00000184618	n.a.	n.a.	-1.747	-0.912	-1.3295	GAGTGCTCAGGAAGGACCAG	CAGTGCTGTCCAGACCCATA
994	ENSG00000176828	n.a.	n.a.	-1.243	-1.416	-1.3295	AGGCAGGACTTCTGCAAGTT	CGCTATAGCCTCCACCCTAA
995	ENSG00000188679	n.a.	n.a.	-1.037	-1.621	-1.329	TTTGGTCCTGAGAAGCACCT	CAGTGGCAGCACAGAAGAGA
996	ENSG00000187741	FANCA	2175	-1.078	-1.579	-1.3285	ATGCCCTTTTGCTTGAGGTA	AGATTCCTGAAGAGCCACGA
997	ENSG00000007080	CCDC124	115098	-1.155	-1.501	-1.328	CCAGGGTGAGAACACCAAGT	TGGGGTTCTCTTGTTTGAGC
1000	ENSG00000066248	NGEF	25791	-0.774	-1.881	-1.3275	CGAGGGAGGAACACTCTCTG	TGCTCCAGGGGATATTCAAG
999	ENSG00000159200	DSCR1	1827	-1.091	-1.564	-1.3275	AGGCTCCAGCTGCATAAGAC	ATGATTTGGAATGCGTCCTC
998	ENSG00000108883	EFTUD2	9343	-1.286	-1.369	-1.3275	GTGCTGCATGAGGACAAGAA	TCTGGCAAGACCACTGTCAC
1002	ENSG00000183741	CBX6	23466	-0.179	-2.475	-1.327	GCCTACAGTCCTCCAGATGC	TAAGGATCCCATGAGGCTTG
1001	ENSG00000109424	UCP1	7350	-1.13	-1.524	-1.327	TCTCCACGGAATCAAACCTC	ATCCAAGTCGCAAGAAGGAA
1003	ENSG00000084628	NKAIN1	79570	n.a.	-1.326	-1.326	CAACTTCCTGCACATCATGG	CTCCTCCAGGAACACTTTGC
1005	ENSG00000100448	CTSG	1511	-0.966	-1.685	-1.3255	ATAATCAGCGGACCATCCAG	TATCCAGGGCAGGAAACTTG
1008	ENSG00000140400	MAN2C1	4123	-0.784	-1.866	-1.325	ATGGAGAAGGTCTGGTGTGG	CTGTGGCATGAATGGTGTGT
1006	ENSG00000117862	TXNDC12	51060	-0.871	-1.779	-1.325	AGACCGGACATTTTCACCTG	AAGAACCGCTGCACTTCCTA
1004	ENSG00000121413	ZSCAN18	65982	-1.701	-0.949	-1.325	ACCCTGAGAGCTGCAAGAAG	TGGATCTCTTTCCACCAACC
1007	ENSG00000149586	n.a.	n.a.	-1.349	-1.3	-1.3245	GCCATCCAGACTGAGGAAGA	GACACAGGTCCCCTTGACAC
1009	ENSG00000153495	C13orf16	121793	-1.162	-1.486	-1.324	GAAAGCGGTTCCCATTTACA	TCTCTTTGGGTGGTCATTCC
1010	ENSG00000100380	ST13	6767	-1.343	-1.305	-1.324	TAATTTTCCCGGAGGAATGC	CCCTAATGGCAAACCACTGT
1011	ENSG00000148384	INPP5E	56623	-1.216	-1.431	-1.3235	AGACTTCAACTTCCGCCTGA	CTGCCTCTGAATCTCCTTCG
1012	ENSG00000180861	C12orf36	283422	-1.007	-1.64	-1.3235	CTCTGAAACGAAGGGCTGAC	CAGCTGCAGAACAGGATTGA
1015	ENSG00000158473	CD1D	912	-2.053	-0.592	-1.3225	TTTCGGGTTTATCGAAGCAG	ACCATGTCTCGTCAGCATTG
1013	ENSG00000198334	n.a.	n.a.	-2.354	-0.291	-1.3225	CAAAGAAGGAGACGGTCTGG	AGCATCAAACTCCCAGTGCT
1014	ENSG00000177354	C10orf71	118461	-1.644	-1.001	-1.3225	AGTTTTGGGGAAGAGGGAAA	TCTCGGTCCTGTCGAAAGAT
1016	ENSG00000105428	ZNRF4	148066	-1.495	-1.149	-1.322	GCCTTCTTTGTCCTGAACCA	GGGCTGAGGAGACAGTGGTA
1018	ENSG00000095261	PSMD5	5711	-1.657	-0.986	-1.3215	AACCCTGGGCTCAGAAACTT	TGACCAAGCTTGTCTGCTCTT
1017	ENSG00000144712	CAND2	23066	-2.198	-0.445	-1.3215	AACTTGCTGCCCTCTTTGAA	AGGCAGAGACACCCTCTGAA
1019	ENSG00000123411	IKZF4	64375	-0.62	-2.021	-1.3205	CAGCTTTACCTGCCCTCTTG	CACACTGGTTGCAATGGAAG
1020	ENSG00000182557	SPNS3	201305	-0.942	-1.696	-1.319	GTTGGAAGTGGTCTGGGCTA	GTACCTCCTCGCAGCTTCTG
1021	ENSG00000071082	RPL31	6160.1	-0.774	-1.863	-1.3185	TGCCATCAACGAAGTGGTAA	TGATCTGACGATCAGCGATT
1022	ENSG00000110987	BCL7A	605	-0.984	-1.653	-1.3185	TTGGTGACACATCCCTACGA	CGAGCGAGGTACCTGAGAGA
1023	ENSG00000162746	FCRLB	127943	-0.706	-1.929	-1.3175	GTCGAGGAGCTCGAATCGTA	AAAGTGAGAGGTGGGGGTCT
1026	ENSG00000138448	ITGAV	3685	-0.539	-2.095	-1.317	ATTCCACTGCAGGCTGATTT	TGCCTTGCTGAATGAACTTG
1024	ENSG00000166987	MBD6	114785	-1.469	-1.165	-1.317	CAATGAGAGCAGTGGAGCAG	GGGGACACAGTGTGGAACAT
1025	ENSG00000178667	n.a.	n.a.	-0.994	-1.64	-1.317	GAAGCTGCTGATTGGAAAGG	ATGTAGAGGAAGGCGTGCTG
1027	ENSG00000158805	ZNF276	92822	-0.928	-1.704	-1.316	CTTCGGACGAGTCCTTTGAG	GCCTTGTGTTTGGTCATGTG
1028	ENSG00000186259	n.a.	n.a.	-2.127	-0.503	-1.315	TAAAGGCCAAGACCCAGGAT	TTTGCCACAATAATGCCTGT
1029	ENSG00000110011	DNAJC4	3338	-1.361	-1.268	-1.3145	TGCCAGCACTGAGGAAGTTA	GATCCGATCCTTTTCATCCA
1030	ENSG00000169896	ITGAM	3684	-2.713	0.086	-1.3135	GCGGATGAAGGAGTTTGTCT	ATTAAGCTCTTGGCGGGATT
1031	ENSG00000197253	TPSB2	64499	-1.211	-1.415	-1.313	CAGTTCTACACCGCCCAGAT	GGTGACACGGGTGTAGATGC
1032	ENSG00000196923	PDLIM7	9260	-1.634	-0.992	-1.313	GAGCCGCACCTCCATTGT	TCGTGCCAAACATCTTCTCA
1033	ENSG00000198354	WDR40C	340578	-1.876	-0.75	-1.313	TATCCAGGCTCCTGTCCATC	CCAGCCACAAAGAGCTTCAT
1035	ENSG00000185517	n.a.	n.a.	-1.076	-1.549	-1.3125	TACCATCCAGCCTTCTGTCC	TCAGCCTGCTGATTTTTGTG
1034	ENSG00000145040	UCN2	90226	-1.873	-0.752	-1.3125	GCATTGTCCTATCGCTGGAT	CATAGCAAGACTCGCCACAG
1037	ENSG00000152439	ZNF773	374928	-1.359	-1.264	-1.3115	AGAGGCTCCTCTACCGCAAT	TGAGTCACCTGGTGCTTGAG
1036	ENSG00000100908	FAM158A	51016	-1.586	-1.037	-1.3115	GTCTGGTGGTGGCTGGTTAC	CAGGCATTTCCATTTCCATT
1038	ENSG00000198046	ZNF667	63934	-0.881	-1.741	-1.311	TAGGATTTCACCCCTGATGC	TGAAGGCTTTTCCACATTCC
1039	ENSG00000125445	MRPS7	51081	-0.873	-1.747	-1.31	GCCAGTGGAGGAGCTAACTG	TGGTTATGGAAAGCCTCCAG
1040	ENSG00000167104	BPIL3	128859	-2.392	-0.227	-1.3095	AGAAGCCTCCCAAGGTCACT	CAGCTTCAAGTCCAGCATCA
1041	ENSG00000146733	PSPH	5723	-1.757	-0.861	-1.309	AGCACTGGAGAAACGAGGAA	TGAGCTTTGAAGCAACATGC
1042	ENSG00000165626	BEND7	222389	-1.939	-0.678	-1.3085	AAGAGGCTCAGCAGAGATCG	CACCAGGGCCTGAAATCTTA
1043	ENSG00000164611	PTTG1	9232	-2.079	-0.538	-1.3085	GGGTCTGGACCTTCAATCAA	AACATCCAGGGTCGACAGAA
1046	ENSG00000116521	SCAMP3	10067	-1.21	-1.405	-1.3075	CCGGAGTGACAGTTCATTCA	TAGGATTGGGAGCACTACGG
1045	ENSG00000165730	STOX1	219736	-0.996	-1.618	-1.307	CAAAATCTTGGCCTTTTGGA	CCCAGTGGGTTTGTAGCATT
1044	ENSG00000167136	ENDOG	2021	-1.246	-1.368	-1.307	CGACACGTTCTACCTGAGCA	GCTCCACCCTCACTTACTGC
1047	ENSG00000165886	UBTD1	80019	-0.619	-1.993	-1.306	CAATGAGCCCCTGAAGAAAG	CTGGTTGATGATGACCTGGA
1048	ENSG00000182459	TEX19	400629	-1.955	-0.655	-1.305	CATTTGCTTCACCTGCTTCA	AGCTGCAGGGCCAGTAACTA
1050	ENSG00000173818	AC120024.22-1	284131	-1.173	-1.436	-1.3045	CTTGGCGTCCTTACAGACCT	CTCTCCGGAGTCTCCTTTGG
1049	ENSG00000080166	DCT	1638	-1.379	-1.23	-1.3045	CCCCTACAGGGCCATAGATT	AACCCTTCCAAAGCATTCCT
1051	ENSG00000183649	n.a.	n.a.	-1.035	-1.572	-1.3035	GTGGCTGGGTTACAAAGAGC	TAGCCAGTCCCTGACTTTGC
1052	ENSG00000105374	NKG7	4818	-1.088	-1.518	-1.303	GGCTCTAAGGACCCAGGAGT	CCAGGAGAAGAAGGTCTGGA
1053	ENSG00000198502	HLA-DRB5	3127	-1.773	-0.833	-1.303	ACAGGCCTGATTCAGAATGG	ATCAATGCTGGGACTTCAGG
1054	ENSG00000070915	SLC12A3	6559	-0.646	-1.958	-1.302	GGCCAGATTAACAGGATGGA	TTTCCTCGGATCAGGATGAC
1055	ENSG00000108278	ZNHIT3	9326	-1.299	-1.305	-1.302	AAAGAATTTAGGGGAATCTGCAA	CCATAAAGGACTTGCCACCT
1056	ENSG00000115295	CLIP4	79745	-1.657	-0.946	-1.3015	GAGTCGCTGGACAAACATGA	GGCCAAGTGACGTAAGCATT
1057	ENSG00000167653	PSCA	8000	-1.011	-1.59	-1.3005	ACTGCGTGGATGACTCACAG	CACAGGGTTAAGGGTGGAGA
1058	ENSG00000122756	CNTFR	1271	-1.583	-1.016	-1.2995	CCACCTACATTCCCAACACC	CTGTGATGGTGTGTGCTGTG
1059	ENSG00000171792	C12orf32	n.a.	-0.85	-1.746	-1.298	TCCCAGCCTACCAGAAACAC	CGTCTCCTCCATGTGACCTT
1060	ENSG00000099804	CDC34	997	-1.766	-0.83	-1.298	TTCCCCATCGACTACCCATA	GCCAGAGTCATCCTCATCGT
1062	ENSG00000185813	PCYT2	5833	-1.355	-1.237	-1.296	GTGTTCACGGCAATGACATC	GTAAGCCCGCGATGATGTAG
1061	ENSG00000179918	SEPHS2	22928	-1.747	-0.845	-1.296	GGTGGTCAACCCTTGGATTA	GCAGCCATCTTGGCAATTAT
1063	ENSG00000011422	PLAUR	5329	-1.356	-1.235	-1.2955	GACCCTGAGCTATCGGACTG	CATCCAGGCACTGTTCTTCA
1064	ENSG00000161091	C19orf28	126321	-1.689	-0.901	-1.295	TTCTACCAGGTGGGCATACTG	AAGCTCATGGAGCCGTACAC
1065	ENSG00000188536	HBA2	n.a.	-1.212	-1.377	-1.2945	GGTCCCCACAGACTCAGAGA	AGAAGCCAGGAACTTGTCCA
1067	ENSG00000139144	PIK3C2G	5288	-1.266	-1.319	-1.2925	TTGATCCACACACTTGCACA	GTTTGTTGCACAGCCTCAGA
1066	ENSG00000183773	AIFM3	150209	-1.301	-1.284	-1.2925	TGGCCTGGACAGTCTACACA	CTCCACTTCTTTGCCTTTGC
1068	ENSG00000134627	PIWIL4	143689	-1.421	-1.164	-1.2925	GAGCTGCCATCAAGTTCTCC	GGCTGATTCAGGTCCGATAC
1069	ENSG00000179583	CIITA	4261	-0.173	-2.411	-1.292	CCGACACAGACACCATCAAC	GGAGATTCAGGCAGCTCAAC
1070	ENSG00000114745	GORASP1	64689	-0.688	-1.895	-1.2915	GAAAGCCAATGTGGAGAAGC	GAGTTGGGATCCGGTGTAGA
1071	ENSG00000166716	ZNF592	9640	-0.828	-1.754	-1.291	GGAGTCATTTGAAGCGGAGA	ACTTTGCTCGTGTTCCTGCT
1073	ENSG00000183160	TMEM119	338773	-1.051	-1.531	-1.291	GTCCCAGTGGAGACACCAGA	CACTTTGTCAGGGGAGCTGT
1072	ENSG00000113504	SLC12A7	10723	-1.566	-1.016	-1.291	GAAAACAGCCCATTCCTCAA	CGAGCGCGATATCATGTAGT
1075	ENSG00000159314	SH3D20	201175	-0.895	-1.686	-1.2905	CCAAGGCTCAGACACACAGA	TCTTGATCCTTGTGGGGAAG
1074	ENSG00000124466	LYPD3	27076	-2.215	-0.366	-1.2905	CAACCAGTCAGACTCCGAGA	AAGCGGAGAGACAAGGATGA
1076	ENSG00000173113	AP001453.6-1	51504,391358	-1.68	-0.9	-1.29	TGCTTACCCACAATCTGCTG	CAAGGGTTGGGGATACACAC
1079	ENSG00000169967	MAP3K2	10746	-1.083	-1.496	-1.2895	TGGCGCTCTTACTGAGAATG	AGACATGAGGTGGCAGCTTT
1077	ENSG00000132004	FBXW9	84261	-1.453	-1.126	-1.2895	CCCAGTGGTGGAAGAGAAGA	CTGAGCTGGCCTTTATCTCG
1080	ENSG00000198276	UCKL1	54963	-1.837	-0.741	-1.289	GTGCCTCTGGGAAGACCACT	GAGGGCTTGACAAACTTGTTG
1078	ENSG00000132530	XAF1	54739	-2.151	-0.427	-1.289	AGAGGGCCCAGAAATAAAGC	ATTCCCTGACTTTGCGATTG
1081	ENSG00000184428	TOP1MT	116447	-0.847	-1.729	-1.288	AAGAGAAGGATCACGCCAGA	TCTTGTACACCGGCTTCTCC
1082	ENSG00000134287	ARF3	377	-1.477	-1.099	-1.288	TCTTCCATACCAGGGACCAG	ACCAGTTACGGTGACGAAGG
1083	ENSG00000177164	n.a.	n.a.	-0.534	-2.041	-1.2875	CTGTTCGCAAAGGTTCTTCC	CAGAAGGTGCCACAGTCTCA
1084	ENSG00000117148	ACTL8	81569	-1.282	-1.293	-1.2875	TCTCTCCGCCTATCTCCTCA	CTTGGTGGAGGAGACGTGAT
1085	ENSG00000121104	FAM117A	81558	n.a.	-1.287	-1.287	AGGAGCAGGGAGAAGAGGAG	GGGCAGTTACGGAAGATGAA
1086	ENSG00000138867	C22orf13	83606	-1.726	-0.845	-1.2855	GGAAACCAGTGGGAGGAAAT	CTTCAGGTGCTGTGCTGGT
1087	ENSG00000006717	n.a.	n.a.	-1.326	-1.242	-1.284	GAAGACCCTCACTGGCAAAA	TCCAGTCAATGAAAGGGACA
1089	ENSG00000189268	n.a.	n.a.	-1.565	-1.002	-1.2835	CAACTTTGAAGGGGAGGTCA	TTCTTCCCAACAAGCACCTT
1088	ENSG00000186017	ZNF566	84924	-1.957	-0.61	-1.2835	CCTGCTGGACATTCTCCCTA	CACCCTGCCTAATGGTGACT
1090	ENSG00000185101	ANO9	338440	-0.892	-1.674	-1.283	AGCTCAGGAGAAAGGGCTTC	TAAGGCTGGCTGTGACTGTG
1092	ENSG00000183655	KLHL25	64410	-1.004	-1.562	-1.283	TTGGGACCCAGAGGTGTAAG	GGCTCTGCAAGTGTCCTTCT
1091	ENSG00000172809	RPL38	6169	-2.396	-0.17	-1.283	GCTGCTTGCTGTGAGTGTCT	CCAATCAGTGTGTCTGGTTCA
1093	ENSG00000131471	AOC3	8639	-0.897	-1.668	-1.2825	TTCGCTTCCAAGGAGAAAGA	CCCAGTAGCACCAAAGAGGA
1094	ENSG00000095585	BLNK	29760	-1.487	-1.077	-1.282	GCTGTGCAGTCACCAGTGTT	TGATTTCAGCAACACTTCCAA
1096	ENSG00000196102	AC100756.5-3	645137	-1.122	-1.44	-1.281	AGGGCTCTGTCTGCTGTCAT	GTTTTTGACCTGGGACTGGA
1095	ENSG00000100399	CHADL	150356	-1.45	-1.112	-1.281	GCTGGGTCTACCTGAGTGGA	CAGTCACAGTGGAAGGGATTG
1097	ENSG00000132024	CC2D1A	54862	-1.139	-1.421	-1.28	ACTGGAGGCTGAGTTCTTGG	CGAGCAGGTTTTCCAGTGTT
1099	ENSG00000175520	UBQLN3	50613	-1.1	-1.459	-1.2795	AGCATGTGTCTGTGCCTGAG	GAGCCTCCATGTGTGGAAGT
1098	ENSG00000150907	FOXO1A	2308	-1.332	-1.227	-1.2795	TTCGTGTGCAGAATGAAGGA	TTTCCATGTTTTCGGGATTG
1100	ENSG00000139800	ZIC5	85416	-1.092	-1.465	-1.2785	ACTGCAAGATTCGAGGCTGT	TAATTAGACCCGGTGGCAAG
1101	ENSG00000055130	CUL1	8454	-0.67	-1.887	-1.2785	AATGCCCTGGTAATGTCTGC	CTCACGCCAATGTCTTGAAA
1102	ENSG00000197421	n.a.	n.a.	-1.342	-1.214	-1.278	AAAACAAGCGGACCGTCAT	GTGGTACGTCAGGCCCTTCT
1103	ENSG00000157566	n.a.	n.a.	-1.65	-0.906	-1.278	GTCAGCAACGTCAAGATGGA	TGGAGTGGAGAACTGGAGAGA
1104	ENSG00000107957	SH3PXD2A	9644	-1.27	-1.285	-1.2775	GCTCCAAGAGTGAGGATTCG	GCCTTCTTGCTCTGGTTGAC
1105	ENSG00000106406	n.a.	n.a.	-0.726	-1.828	-1.277	GACATCCGTAAAGGCATCGT	GCTGAAGGACGAATCTCAGG
1108	ENSG00000062822	POLD1	5424	-1.292	-1.262	-1.277	CACAGAAACTGGGCCTGACT	AGTGACCTGACACCCAGTCC
1106	ENSG00000106049	HIBADH	11112	-1.542	-1.012	-1.277	ACTGTGGAGCTGTTGGGACT	GGGCACACTCAGAAGGTCTC
1107	ENSG00000076826	KIAA1543	57662	-0.559	-1.994	-1.2765	GCCTTCGAGTGGACAAAGAC	GCAAGTCCTTCACTTGCACA
1109	ENSG00000175556	LONRF3	79836	-0.9	-1.653	-1.2765	ATCTTTCGACGCATCTGACC	CCCTTTGACAGGATCTCCAA
1110	ENSG00000169717	ACTRT2	140625	-1.134	-1.419	-1.2765	TCTCGTGGACGACATCAAAA	GTGACCCACATCTGCTTGAA
1111	ENSG00000159214	CCDC24	149473	-1.101	-1.451	-1.276	CGCCTCTCCTAAAGGACCTC	TCCATGGCCTTCTTCTGTTC
1112	ENSG00000198125	MB	4151	-0.97	-1.581	-1.2755	AAGAGAGAGCGGGGTCTGAT	AGGAGGCACACACAAGTTCC
1113	ENSG00000115657	ABCB6	10058	-0.994	-1.557	-1.2755	GTTTGGCCTCATTGTGTTCC	AACCAATTGAGGGGCATGTA
1114	ENSG00000106785	TRIM14	9830	-2.361	-0.188	-1.2745	AGCAGCAGCACATTGACAAC	GTACTCTCCACGGCTTCCAC
1115	ENSG00000091704	CPA1	1357	-1.305	-1.242	-1.2735	ACTCAAGACTACGGGCAGGA	CTGATCCAGCTCATCCTGGT
1117	ENSG00000108784	NAGLU	4669	-0.756	-1.79	-1.273	ATGTGTGCACGCAAAGCTAC	TGGCTGCATCTCATTGAAAG
1116	ENSG00000168936	TMEM129	92305	-0.871	-1.675	-1.273	TCACTCTCGCCTATCTGGTG	CCCACGTGTCTGTCACAATC
1119	ENSG00000167658	EEF2	1938	-0.882	-1.663	-1.2725	AAGCCTGTGCTGATGATGAA	CGCATCAAACACCTTGAAGA
1118	ENSG00000189223	n.a.	n.a.	-1.947	-0.598	-1.2725	CCCTCTGTGAATGTGGCTTT	AAAGGAGGAGAAGCCTGGAG
1120	ENSG00000198382	UVRAG	7405	-1.042	-1.502	-1.272	GCTGAGCACCTCAAACTTCA	ACTTCTCCCCTCCTTTTGGA
1121	ENSG00000122507	BBS9	27241	-2.449	-0.094	-1.2715	TTCAACACCTGGACACCTTG	TGCATCGGTACTTAGGCAGA
1122	ENSG00000132692	BCAN	63827	-1.152	-1.39	-1.271	ACTCCAGAAGACCCAGCAGA	GGGATGCTAGGTTCCTCTCC
1123	ENSG00000127423	C1orf135	79000	-1.766	-0.776	-1.271	GGGCCAACTCAAAATCTGAA	GCAAGGTCCCAGTCAGACAT
1124	ENSG00000073670	ADAM11	4185	-1.473	-1.067	-1.27	TTGTGATCAACGACCACCAG	ACATCATGCCCAGGTTCTGT
1126	ENSG00000197575	RPS17P2	n.a.	-1.525	-1.015	-1.27	CACCAAAACCGTGAAGAAGG	CCCAACTGTAGGCTGAGTGA
1127	ENSG00000006327	TNFRSF12A	51330	-1.62	-0.92	-1.27	TTTCTGGCTTTTTGGTCTGG	GGGCCTAGTGTCAAGTCTGC
1125	ENSG00000154133	ROBO4	54538	-1.84	-0.7	-1.27	CCCACCTCAGGAAGTGACTC	AGAAGCAGCAGCCAGAGTG
1128	ENSG00000137320	n.a.	n.a.	-1.844	-0.695	-1.2695	GGCTCTTTCCAGTTTGACCA	TCACTGTGTTCCAGCTCCTG
1129	ENSG00000105223	PLD3	23646	-0.443	-2.095	-1.269	TATGACACCCGCTACAACCA	TTGGAGGTTCCGATGTAGGT
1130	ENSG00000171368	TPPP	11076	-1.455	-1.082	-1.2685	TGGACATCGTCTTCAGCAAG	AGTGCGAGGTGACAGAGTCC
1131	ENSG00000115255	REEP6	92840	-0.976	-1.559	-1.2675	GAGCACTTCCTGGAGCAAAG	GGCTTGACGTTCCTGGTTAT
1132	ENSG00000059804	SLC2A3	6515	-1.202	-1.333	-1.2675	CACCCAGGATGTATCCCAAG	GCCTGGTCCAATTTCAAAGA
1133	ENSG00000109471	IL2	3558	-0.753	-1.78	-1.2665	ACCTCAACTCCTGCCACAAT	ATGGTTGCTGTCTCATCAGC
1135	ENSG00000143947	RPS27A	6233,388720,728590	-0.915	-1.617	-1.266	GAAAACCCTTACGGGGAAGA	ATCAGAAGGGCACTCTCGAC
1134	ENSG00000188674	C2orf80	389073	-1.168	-1.364	-1.266	TCTCCGGTTGCCTCTAGACT	AGATGAAACTCGGGGAACCT
1136	ENSG00000183686	n.a.	n.a.	-1.486	-1.046	-1.266	GGTCACCAGGTCCTCTCAAG	GCCCAAGACGATTATCAGGA
1137	ENSG00000197301	AC090673.5-1	100129940	-1.318	-1.212	-1.265	AAAACTCCACAGAGCCATGC	GCTGCCATTTTTCTTTCTGC
1138	ENSG00000146535	GNA12	2768	-1.192	-1.337	-1.2645	CCACCTTCCAGCTGTACGTC	GGTCTTCACCTTCTCCACCA
1140	ENSG00000089123	TASP1	55617	-1.533	-0.995	-1.264	AACGAGGAGGCTTTGTGTTG	GGCAAGAGGGTATTCCATGA
1142	ENSG00000100055	CYTH4	27128	-0.72	-1.807	-1.2635	CCAAGTCATGCCCATTCTCT	GGACTGCTCGTCAGTGGTCT
1139	ENSG00000131845	ZNF304	57343	-1.269	-1.258	-1.2635	GAACACCAGGGATCACACCT	CTGAAGGGTCTCACCTCAGC
1141	ENSG00000151726	ACSL1	2180	-1.353	-1.174	-1.2635	GCCCCTGAAAAGATTGAAAA	TGCCATTTCCTCTGAGCTTT
1143	ENSG00000162298	SYVN1	84447	-0.813	-1.712	-1.2625	GCTGGAGGCAAGCTATGAAC	TCTGGCACTCCTGTTCCTCT
1144	ENSG00000186834	HEXIM1	10614	-0.214	-2.31	-1.262	ACCCTCATCACCTTGCTCAC	CGATTGCCACCTACTGTCCT
1146	ENSG00000186635	ARAP1	116985	-0.764	-1.76	-1.262	GAGGACGAGGAGGAGAAGGT	ATGCTGGGACCTTGATATGC
1145	ENSG00000124693	HIST1H3B	n.a.	-1.262	n.a.	-1.262	CAGACAGCTCGGAAATCCAC	GCTGGATGTCTTTGGGCATA
1147	ENSG00000100439	ABHD4	63874	-0.366	-2.156	-1.261	CCAATCCATTGGCTGTTCTT	GATCTCCTCCACCACAGCAT
1151	ENSG00000183048	SLC25A10	1468	-0.859	-1.662	-1.2605	GCTGATTTCTCCCCTCTCCT	CTGGTGAGTGGAGAGGCTTT
1148	ENSG00000171552	BCL2L1	598	-1.573	-0.948	-1.2605	TGTTTGTGGCCTCAGAATTG	CACAGGCTGCTCTTGTAGGA
1149	ENSG00000103507	BCKDK	10295	-0.897	-1.623	-1.26	TGCAGCAAGAACTTCCAGTG	GCAAAGTCCACCCACTTCTC
1150	ENSG00000198400	NTRK1	4914	-1.247	-1.273	-1.26	TGCCTGCCTCTTCCTTTCTA	CAGCCTCACGCTGGAAGT
1152	ENSG00000089737	DDX24	57062	-1.52	-1	-1.26	TCTCTGGGCTCCTCAAAGTC	CAAGCCTGGAAGTTCCGATA
1154	ENSG00000188636	LDOC1L	84247	-1.064	-1.455	-1.2595	AGACGTCCAAAGCTGAAAGC	CCCAGTCAGTCGAGACACAA
1153	ENSG00000140519	RHCG	51458	-1.313	-1.206	-1.2595	GCACAAGAACTTGAGCGACA	GCTCTAGGTTGCGTCGGTAG
1155	ENSG00000130167	TSPAN16	26526	-0.994	-1.522	-1.258	CCCAGAGGTTCAGGAAGATG	AGGGTCACGAAGGTGTGTTC
1156	ENSG00000100109	TFIP11	24144	-1.2	-1.316	-1.258	CCAGAAAGGTTTTGCAGGAG	AGTTCCTTCTGGGGAGCAGT
1157	ENSG00000074071	MRPS34	65993	-1.218	-1.297	-1.2575	CCATGATTATCGCAGAACGA	GATCCAGGCAGAGAGAGCAC
1158	ENSG00000184157	n.a.	n.a.	-0.859	-1.655	-1.257	TGCTGGTAGGATTTGTGCTG	GCTGGCTAGTGTCAGGGAAG
1159	ENSG00000130309	GLT25D1	79709	-1.442	-1.072	-1.257	ATGGAACAATGAGCACGTCA	ATGGGAACCTTGCATACAGC
1161	ENSG00000163472	TMEM79	84283	-1.044	-1.469	-1.2565	TTCTTGCAGGGAAAAAGGTG	GGGAAGTTACAGGGGCCTAA
1160	ENSG00000132821	C20orf102	128434	-1.133	-1.38	-1.2565	TTCACAGAGACACCCCATGA	CAGGGGCATCAGTCTAGAGG
1162	ENSG00000131153	GINS2	51659	-1.375	-1.136	-1.2555	GGGATCATGAACGAAAGGAA	TCCTTGCACCATCACACATT
1163	ENSG00000118513	MYB	4602	-1.133	-1.377	-1.255	GGGCAGTAGAGCTTGGACAG	AACACAGGATCCATGCAACA
1164	ENSG00000138061	CYP1B1	1545	-1.685	-0.825	-1.255	TGTCCTGGCCTTCCTTTATG	CAGCTTGCCTCTTGCTTCTT
1167	ENSG00000119383	PPP2R4	5524	-1.874	-0.635	-1.2545	GCTGCTTTCCTCTGCTGTCT	AGGGAACTTCTCCAGGCACT
1170	ENSG00000136383	ALPK3	57538	-1.086	-1.422	-1.254	TCCATTGGGGTTAGCACTTC	GACTGACCTTCCATGGCTGT
1169	ENSG00000142765	SYTL1	84958	-1.095	-1.413	-1.254	GAATCCGGTTTTCAACGAGA	GTGATTGAACACAGGGCTGA
1165	ENSG00000149541	B3GAT3	26229	n.a.	-1.254	-1.254	CCACCTGGAGAGCAGTCTTC	GCCAACCTGACTCAACACAA
1166	ENSG00000164517	n.a.	n.a.	-1.564	-0.944	-1.254	GAAGACCTGCACCTGGAAAA	AGGCCTTGTTCTTCTCATGC
1168	ENSG00000146904	EPHA1	2041	-1.592	-0.916	-1.254	GCAACTATCATGGGCCAGTT	ACAATCCCAAAGCTCCACAC
1172	ENSG00000167552	TUBA1A	7846	-0.558	-1.949	-1.2535	GCACTCTGATTGTGCCTTCA	ACTGGATGGTACGCTTGGTC
1171	ENSG00000197852	C1orf183	55924	-1.485	-1.022	-1.2535	TGTCTATGGCTCTCCCAACC	CTAGGCTGTTCTGCCTCCTG
1173	ENSG00000174498	IGDCC3	9543	-2.648	0.143	-1.2525	CGAATCACCTGGAGGAAGAA	GAGGCCACACAGTGGAAGAT
1174	ENSG00000182511	FES	2242	-1.754	-0.751	-1.2525	TGCTCATCGACCACCTACTG	GCTCTCCAGGTACTCCATGC
1175	ENSG00000129699	n.a.	n.a.	-1.565	-0.938	-1.2515	GGAAGTGGAGCAGAAGATGC	ACCATGCCAGGTGGATTTAG
1176	ENSG00000156584	n.a.	n.a.	-1.134	-1.367	-1.2505	AAGCCATCGTGGACAAGTTT	ACAAGGCTGCGGTACAGTTC
1177	ENSG00000144152	FBLN7	129804	-1.25	n.a.	-1.25	TGAGGCCCTTCCCTTAGATT	CAGGCAGAATCCATGCTTTT
1178	ENSG00000166794	PPIB	5479	-1.491	-1.008	-1.2495	ATGTAGGCCGGGTGATCTTT	CTTCTCCACCTCGATCTTGC
1179	ENSG00000132840	BHMT2	23743	-1.458	-1.041	-1.2495	TTTGGACATGCACACCAAAC	CTTCAAAGGAATGCACCACA
1180	ENSG00000171446	KRT27	342574	-0.739	-1.758	-1.2485	ACGCACTCTTCAAACCCTTG	CTCAGAGGCTGGAGTTCAGG
1183	ENSG00000119913	TECTB	6975	-1.699	-0.798	-1.2485	CGTTTCCAATGACACCACAG	AACCGGAAAGCATTGAATTG
1181	ENSG00000163430	FSTL1	11167	-1.765	-0.732	-1.2485	CGATGGACACTGCAAAGAGA	TCAGGAGGGTTGAAAGATGG
1182	ENSG00000108106	UBE2S	27338,731049	-0.919	-1.577	-1.248	TCCAACGTGGAGAACCTACC	GAGCCGCATACTCCTCGTAG
1184	ENSG00000166831	RBPMS2	348093	-1.827	-0.669	-1.248	GAGGTCCGGACACTGTTTGT	GACGGTACTTCCATCCTTGC
1185	ENSG00000092094	OSGEP	55644	-1.494	-1.001	-1.2475	CTGCATTGCATACACCAAGG	CGATGGGCTACATCCTCAAT
1186	ENSG00000156140	ADAMTS3	9508	n.a.	-1.247	-1.247	TGAACCATGTTTGGGAGACA	CAGCCATTTGTGAAGCTGAA
1187	ENSG00000188669	n.a.	n.a.	-1.091	-1.401	-1.246	CGGGTCACTGATGAAGACCT	ACATGGGGTTCAATGTGGAG
1189	ENSG00000166922	SCG5	6447	-1.498	-0.993	-1.2455	AAGGTGGAGCTCATGAAGGA	CATGCTGAGGCCTAACAGGT
1188	ENSG00000139767	KIAA1853	84530	-1.085	-1.406	-1.2455	GGAATCCACGTTTCAGCACT	TTGCTTTTTGGGCTAGAGGA
1190	ENSG00000144713	RPL32	6161	-0.782	-1.708	-1.245	AACCCAGAGGCATTGACAAC	GATGCCAGATGGCAGTTTTT
1191	ENSG00000133475	GGT2	728227	-1.147	-1.343	-1.245	CCACTCACCCGATCTCCTAC	GTTGGGCAGAAGCTTGTTGT
1193	ENSG00000167967	E4F1	1877	-1.042	-1.445	-1.2435	GAGGTGGACAGCCACATCAT	CTCAGAGTCCTCTGCCCTGT
1192	ENSG00000006704	GTF2IRD1	9569	-1.168	-1.319	-1.2435	ACTCATCCCAAAGCCTGATG	GGAAGACGAGGAGGAAGAGG
1195	ENSG00000155666	JMJD5	79831	-2.152	-0.334	-1.243	GTTGAAGCAGGACATCAGCA	AGGCCCTTTCAGCTCCTATC
1194	ENSG00000160349	LCN1	3933	-1.31	-1.176	-1.243	TGAATCTGGAATCGGTGACA	TTCCATGTCCCTGTGAATGA
1196	ENSG00000196932	TMEM26	219623	-1.545	-0.94	-1.2425	GTGACCGAGGTGAAGAAGGA	TCCAATGGGTAGAAGCCATC
1197	ENSG00000182572	HIST1H3I	n.a.	-1.374	-1.11	-1.242	AAAGCAAACAGCTCGCAAGT	CGCAAGCTGGATGTCTTTAG
1198	ENSG00000069535	MAOB	4129	-1.868	-0.614	-1.241	TGCAGAAGAGTGGGACAACA	CAGAGGGGGATTGAAGTGAA
1200	ENSG00000105732	ZNF574	64763	-0.419	-2.062	-1.2405	GACCATAGCAGCGAGTCACA	ACATCTTGCCACAAATGCTG
1199	ENSG00000181481	RNF135	84282	-1.096	-1.385	-1.2405	CCAGCCAGGTCTTATGTTCC	GGGAGAGAGACCAGGAAACC
1204	ENSG00000129543	n.a.	n.a.	-0.646	-1.834	-1.24	GCTTCCGTCATGGAGTCATT	ACATGCTCCCATCCACTCTC
1205	ENSG00000198546	ZNF511	118472	-0.789	-1.691	-1.24	AGCCGCTGCCTGTAGAGC	CCTCACCATGTGATCCTTCC
1202	ENSG00000184357	HIST1H1B	3009	-1.379	-1.101	-1.24	AAATCCCCGGCTAAGAAGAA	CTCTTCGCCACCTTTTTGAC
1201	ENSG00000126214	C14orf153	3831.84	-1.854	-0.626	-1.24	CAAGTAATTCAGGGGCTGGA	GCGTACTGGATCACCAGGTT
1203	ENSG00000168209	DDIT4	54541	0.185	-2.664	-1.2395	ACTACTGCGCCTGGCCTAC	TTAGGTGGCTGCCTCAGTTT
1206	ENSG00000011201	KAL1	3730	-0.778	-1.699	-1.2385	GCCAAGGCCAATCTCTATCA	TGGAAGTGTGCATGTCTCGT
1207	ENSG00000169994	MYO7B	4648	-1.767	-0.709	-1.238	GGGAGAGGAATCGAGTAGGG	CGGTTAGGCTCTCTCCAGTG
1208	ENSG00000101577	LPIN2	9663	-1.933	-0.542	-1.2375	GGCTCTTCCCTCCAATTACA	TTTCATCTCCACCCGATTTC
1209	ENSG00000125821	HARS2	92675	-1.086	-1.388	-1.237	GCACTGGTCGAAGAGTGTGA	CTGAATTCTGCCTCCTGAGC
1210	ENSG00000139269	INHBE	83729	-2.037	-0.436	-1.2365	TTGCTGCCTCTTTCCATTCT	GCTTTACCCATCTCCCAACA
1212	ENSG00000196628	TCF4	6925	-0.934	-1.538	-1.236	TGCCATGGAGGTACAGACAA	CAGGAGGCGTACAGGAAGAG
1211	ENSG00000125505	LENG4	79143	-1.28	-1.192	-1.236	AAATACCCTGCCTGCAACTG	ATAGGCCAAGCGATGAGAAG
1213	ENSG00000149658	YTHDF1	54915	-1.097	-1.374	-1.2355	GCAGCGATAGCAACTCTCCT	TCCACTGGACATCAAACTTCC
1216	ENSG00000108479	GALK1	2584	-1.025	-1.445	-1.235	GGTGTCTCTCCTCACCACCT	AGGACCTGCAGTCAATGAGC
1214	ENSG00000187775	DNAH17	n.a.	-1.444	-1.026	-1.235	GAAGTCAAGGCCTCCATCAG	TTCACAGGCCTTTTGCTTCT
1215	ENSG00000174969	n.a.	n.a.	-1.664	-0.806	-1.235	CATCCCTTGCAACACATCAG	AAATTGGAGCTCTGGCTGAA
1218	ENSG00000101473	ACOT8	10005	-0.613	-1.856	-1.2345	ACATGGGAAGCCCATCTTC	ATGAAGTGCACCTTGTGCTG
1217	ENSG00000128602	SMO	6608	-1.801	-0.668	-1.2345	TTCCTCATCCGAGGAGTCAT	TTTGGCTCATCGTCACTCTG
1219	ENSG00000095066	HOOK2	29911	-0.448	-2.02	-1.234	TGCTCACCTGGTTACAGACG	TGGTCATGAGCTCTTGGATG
1221	ENSG00000184432	COPB2	9276	-0.925	-1.542	-1.2335	TACAGAGCCATGGATGTTGG	AGAGGCACTGGCAAACTGAT
1220	ENSG00000072201	LNX1	84708	-1.179	-1.288	-1.2335	TATGAGCCCCAGGAAGACTG	TTTTCCTCTGACCCATCATTG
1222	ENSG00000090097	PCBP4	57060	-0.286	-2.18	-1.233	CTCCACAGAGCGAGCTGTTA	GAGAGCCAGTGATGGTGACA
1224	ENSG00000118156	ZNF541	84215	-1.324	-1.142	-1.233	ACCCTTCCAGGAATCCAGAC	GGGGGAGCCTGTAGATGTTT
1223	ENSG00000187210	GCNT1	2650	-1.718	-0.748	-1.233	AAAGAAGAGGCGGAGTTTCC	CGACCTCATACCGCTTCTTC
1225	ENSG00000145681	HAPLN1	1404	-0.924	-1.541	-1.2325	CTTGAGAGCATCCGAACTCC	CTGCCTCCCTTCAGAAACAC
1227	ENSG00000168546	GFRA2	2675	-0.485	-1.978	-1.2315	AGCGACTCCAGTCTCTCGTC	GTAATCAGCCCCAAATCCAA
1226	ENSG00000183378	OVCH2	341277	-2.495	0.032	-1.2315	AGACAGACCCATTGGTGAGC	TCCCGTTTTCATCTGATTGG
1228	ENSG00000120659	TNFSF11	8600	-1.313	-1.149	-1.231	TTTCAAGGAGCTGTGCAAAA	TGGTGCTTCCTCCTTTCATC
1230	ENSG00000178928	TPRX1	284355	-1.09	-1.371	-1.2305	GGGATGACTCTATGGGCAAA	AAGTGTTGGGGAAGATGCTG
1229	ENSG00000164010	ERMAP	114625	-0.958	-1.503	-1.2305	GGGAGACAAGACCAAATGGA	TCTCCATTAGCATGGCCTTT
1232	ENSG00000107819	SFXN3	81855	-1.126	-1.334	-1.23	AAGCAAAATGGGTGAATTGC	TGGCACTCACATAGGCTGTC
1231	ENSG00000109062	SLC9A3R1	9368	-1.588	-0.872	-1.23	CCTTCACCAATGGGGAGATA	ACGGGAACACATTCACCTTC
1233	ENSG00000179800	n.a.	n.a.	-1.264	-1.195	-1.2295	AGTGAGAAACCCCACGAATG	GTCCTCTGACGCAGGATGAG
1235	ENSG00000179851	n.a.	n.a.	-1.527	-0.932	-1.2295	AGCCTTCGGGGTGAACTTAC	CTTGTCAATGTCCCCATCCT
1234	ENSG00000065978	YBX1	4904	-1.612	-0.847	-1.2295	GGAGATGAGACCCAAGGTCA	CAGGTGCTTGCAGTTTGTTG
1236	ENSG00000119650	C14orf179	112752	-1.167	-1.29	-1.2285	AGGCCGAGAATCACCTCAAT	CGAGCACTTTGGTGAGGAGT
1238	ENSG00000197724	PHF2	5253	-2.042	-0.415	-1.2285	GTGTGCCCAACAAAGATGTG	GGCAGCACAGCCTTCTTATC
1237	ENSG00000185421	n.a.	n.a.	-1.684	-0.772	-1.228	CCAGAGCCATTCCCAGATAA	AACCTGTTGCCTTTGGTCAG
1239	ENSG00000197236	n.a.	n.a.	-1.849	-0.607	-1.228	CGCCGCCTCTAGAGTTACTG	CCCTCAGCTGGAGTCAAAAG
1240	ENSG00000187010	RHD	6007	-1.741	-0.714	-1.2275	CTCTAAGTACCCGCGGTCTG	TGAGATCAGCACCGACAAAG
1241	ENSG00000168759	n.a.	n.a.	-1.227	n.a.	-1.227	GGAAAGCGGAGCTAAGTGTG	CTACTCCCTCGCTTCCACAG
1243	ENSG00000142627	EPHA2	1969	-1.172	-1.28	-1.226	GGGACCTGATGCAGAACATC	AGGCACCGATATCCTGGAAG
1242	ENSG00000110076	NRXN2	9379	-1.235	-1.217	-1.226	CCACCCTCCTTCCCTACTTC	AAGTGACCCCAGCAGTCTGT
1245	ENSG00000077312	SNRPA	6626	-1.031	-1.419	-1.225	ACTCCCGCCTTACCTGACTT	GTGCCTTTCATCTTGGCAAT
1244	ENSG00000110013	SIAE	54414	-1.7	-0.75	-1.225	CCAAGGTCAGGAAACCATCA	GTCCAAAGAGCCAGCACACT
1247	ENSG00000179546	HTR1D	3352	-1.242	-1.207	-1.2245	TGCCTTTGTACTCACCACCA	AAGCGCTTCCCATAGAGTGA
1246	ENSG00000197615	n.a.	n.a.	-1.604	-0.845	-1.2245	AGGGGTGGGGAGTATTAGGA	CACTGCCACTGCTATCTGGA
1249	ENSG00000141018	n.a.	n.a.	-1.729	-0.72	-1.2245	AGATGTGGAGAGCAGCCTGT	AAACGGTGAGGGTTTCTGTG
1248	ENSG00000143151	n.a.	n.a.	-1.427	-1.021	-1.224	CAATGGGATGTTGTTGTGGA	GCTTCCCTGGACATTGACAT
1251	ENSG00000100101	NOL12	79159	-0.332	-2.115	-1.2235	GCCGCAACAAGAAGAAGAAG	CCTCCTCAGACCTGTCTCCA
1250	ENSG00000128242	GAL3ST1	9514	-1.091	-1.356	-1.2235	CCTGCTCAACATCCTGTTCC	GCTGTTGTCATAGCCCAGGT
1253	ENSG00000108439	PNPO	55163	-1.26	-1.186	-1.223	CCTGCATGACCGGATAGTCT	TCACCAGAAAGGGAGTCACA
1252	ENSG00000141480	ARRB2	409	-1.331	-1.115	-1.223	AATCTTCCATGCTCCGTCAC	TTGTTCGAGTTGAGCCACAG
1255	ENSG00000125352	RNF113A	7737	-1.035	-1.41	-1.2225	GATGCACAAGCCATCTTTGA	CTCTGGCGACAGATGAAACA
1254	ENSG00000173372	C1QA	712	-1.182	-1.263	-1.2225	GGTCATCACCAACCAGGAAG	ATAGCGCCCCCATTTTACAG
1256	ENSG00000139718	SETD1B	23067	-1.468	-0.976	-1.222	GCAGTGAGGGCTTCTACACC	CTTCTGTGACTCCACCGTGA
1257	ENSG00000104980	TIMM44	10469	-1.59	-0.853	-1.2215	GTGGAGTCCGTGAAGAAGGA	ACATTGGGGATGATGTCGTT
1258	ENSG00000071246	VASH1	22846	-0.485	-1.957	-1.221	CAGCCCAGAGAGATGAGGAG	GCATGCTGTTGGTGAGGTAA
1259	ENSG00000100181	n.a.	n.a.	-1.199	-1.242	-1.2205	CAACTTCTGTTCCCGCAAAT	GATGGGCGTTGACATCTTCT
1261	ENSG00000147065	MSN	4478	-0.977	-1.463	-1.22	CCACCTGGCTGAAACTCAAT	AGGACAGCATCCTCCCTGAG
1260	ENSG00000060140	STYK1	55359	n.a.	-1.22	-1.22	ATTTCACTGGGCTGCAAGAT	AGCCACATTTCCTCCATGTC
1262	ENSG00000126709	IFI6	2537	-1.117	-1.322	-1.2195	CTCGCTGATGAGCTGGTCT	AGTTCTGGATTCTGGGCATC
1263	ENSG00000099377	HSD3B7	80270	-1.395	-1.044	-1.2195	TCCAGGAGCCTTGAGTCTGT	AGAGGTGGGAAGTGAAAGCA
1264	ENSG00000168067	MAP4K2	5871	-0.297	-2.141	-1.219	CCTGATGCTCATGTCGAAGA	GTTCCCATGGTATCGTCTGG
1265	ENSG00000133119	RFC3	5983	-0.85	-1.588	-1.219	CTTCCTTCACAACTGGCTCA	CCAATCCATCCTCCATGAAC
1266	ENSG00000188582	PAQR9	344838	-1.192	-1.245	-1.2185	CAGCACGGTGGCCTACTACT	GGCCGATAATGTCGAAAAGA
1267	ENSG00000012822	CALCOCO1	57658	-0.443	-1.991	-1.217	AGAACGGAATGACCTGATGC	TTCTCCTGTTGTGCCACTTG
1268	ENSG00000180638	SLC47A2	146802	-1.691	-0.743	-1.217	CCACGTGGACTTCTTCAGGA	TGCAGTTGGCTGATGTCTTC
1269	ENSG00000184033	CTAG1B	1485.25	-0.831	-1.602	-1.2165	CTCCATCAGCTCCTGTCTCC	CTCCTCCAGCGACAAACAAT
1270	ENSG00000198326	C20orf141	128653	-0.937	-1.495	-1.216	TCCTTCCTGCTGCTCTTCTC	CACGGGTATCATCACATCCA
1271	ENSG00000126759	CFP	5199	-1.543	-0.889	-1.216	CTTCACCCTGGTTCAACACC	TTCTGGTAGGCAAAGGCAGT
1272	ENSG00000099995	SF3A1	10291	-0.752	-1.678	-1.215	AGCCCACAGAAGAAGAAGCA	TCCAAGTCGAAGGCTGAGAT
1273	ENSG00000124496	TRERF1	55809	-0.563	-1.866	-1.2145	ACCTGCGAATTCAGGTCAAC	CGGCTGCGTCTGTATTTCTT
1275	ENSG00000184292	TACSTD2	4070	-1.141	-1.288	-1.2145	GCCTTCAACCACTCAGACCT	AACTCCCCCAGTTCCTTGAT
1274	ENSG00000005156	LIG3	3980	-1.155	-1.273	-1.214	TGCAAGTCCGTTGAGTATGC	AGAACATGATCCGGTTTGGA
1276	ENSG00000183134	GPR44	11251	-1.918	-0.509	-1.2135	GCCTCCCCTTTAGCTCTCTG	GCCTGGGAGCTTGTTAAGTG
1277	ENSG00000154719	MRPL39	54148	-1.213	n.a.	-1.213	ATGGACAGCCTTGGGACAT	CAGGGTTCTGAGATGCCTTC
1278	ENSG00000178217	SH2D4B	387694	-2.033	-0.392	-1.2125	GGCCCTCTCTATGCAGGTTA	AACCCACGCAAAACTGGTTA
1279	ENSG00000169242	EFNA1	1942	-1.603	-0.82	-1.2115	GGGATGGAGAAAGAAGTGGA	GGCACTGCCCTTACAGCTAC
1281	ENSG00000137497	NUMA1	4926	-1.633	-0.789	-1.211	AATTCCAGGTGGCAACTGAT	GCGTGCTGTAGAACGATGAG
1282	ENSG00000106211	HSPB1	3315	-1.211	n.a.	-1.211	GTCCCTGGATGTCAACCACT	TGGTTGCTTTGAACTTTATTTGA
1280	ENSG00000179630	C13orf31	144811	-1.519	-0.903	-1.211	AAACGGAGAGATCCCAAGGT	CCTTGTGGCTTTACGGATGT
1283	ENSG00000134538	SLCO1B1	10599	-1.13	-1.291	-1.2105	GTTTTGACTGCTTTGCCACA	CCAACCCATCGAGAATCAGT
1284	ENSG00000168159	RNF187	149603	-0.86	-1.557	-1.2085	TCTCGGAGCTGGAGAAGAAG	ACACTCAATGGTGCACCTCA
1285	ENSG00000164430	C6orf150	115004	-0.67	-1.745	-1.2075	AAGAAGAAACATGGCGGCTA	TCTCCAGGATTTAGGGTGACTC
1286	ENSG00000035403	VCL	7414	-0.872	-1.543	-1.2075	CGGGTTGGAAAAGAGACTGT	TCACGGTGTTCATCGAGTTC
1287	ENSG00000149547	EI24	9538	-1.533	-0.882	-1.2075	AGTGGTGAATGCCATTTGGT	AGGCGCAACTGGAAGAGATA
1288	ENSG00000111985	n.a.	n.a.	-0.858	-1.556	-1.207	CTGACAGCTTCTGGCAACAG	GTGGATCCGGACTGTGATCT
1289	ENSG00000174197	MGA	23269	-1.631	-0.783	-1.207	AGCTCAAGCATCCCTCAAAA	CCTCCCTGATTCCTTCTTCC
1290	ENSG00000171159	C9orf16	79095	-1.176	-1.237	-1.2065	AAGCAGAATACGCTGCCATC	GTTGCAGGCCCACTCTTG
1291	ENSG00000197622	CDC42SE1	56882	-0.759	-1.653	-1.206	GGCTGGACTCCCTCTACTCC	TTGAGGGGCTGTAAGCCTAA
1292	ENSG00000165507	C10orf10	11067	-1.617	-0.795	-1.206	CAGAGGGAGGCTCTGTGAAG	AGCGAACGGGATTGGTAAC
1293	ENSG00000102870	ZNF629	23361	-1.391	-1.02	-1.2055	GAGGATCCACATCGGAGAAA	TTGTTTGCATTCAGGGCATT
1294	ENSG00000185674	LYG2	254773	-1.213	-1.197	-1.205	AAAGAAGTCGGGCAGAGACA	ATCTGAGCACTCTGCCAACC
1295	ENSG00000167105	TMEM92	162461	-1.205	n.a.	-1.205	GCCTTCTGAGTCACCTCCTG	GCTCATCCAGTCCAATGTCC
1296	ENSG00000167861	C17orf28	283987	-0.724	-1.685	-1.2045	GTGGGTCCTCTCCTGGAAGT	AAGCTCAGAATGGTGGATGG
1297	ENSG00000053372	MRTO4	51154	n.a.	-1.204	-1.204	GGAACAGCAAGCTGAAGGAC	CTCTCTGGCAAGTCGTCTCC
1298	ENSG00000115841	FAM82A1	151393	-0.844	-1.562	-1.203	TCTGGCAAGTCGGAGAGTTT	AATGTCCATTCATGGGTGCT
1299	ENSG00000126002	n.a.	n.a.	-0.745	-1.66	-1.2025	TGAGGATCAGACATCACTGGA	GGTGTGTCCTCCTCAGAACC
1300	ENSG00000148600	PCDH21	92211	-1.998	-0.406	-1.202	AGCCTTGTAAATGGGAACGA	GACTTGGGCTTCATTCAGGA
1301	ENSG00000128645	HOXD1	3231	-1.726	-0.677	-1.2015	TTCAGCACCAAGCAACTGAC	GGAACTCGGAAGCCAACTAA
1302	ENSG00000162493	PDPN	10630	-1.365	-1.035	-1.2	CTGCTCTTCGTTTTGGGAAG	ACGATGATTGCACCAATGAA
1303	ENSG00000183578	TNFAIP8L3	388121	-0.297	-2.102	-1.1995	ACACCAGCAGCGAGATCTTT	TTGGGCCTACAGTCTCCATC
1305	ENSG00000112297	AIM1	202	-0.077	-2.321	-1.199	TTTTGTCATGGAGGGAGGTG	TCCTGTGAAGTCAGGATTTTCAT
1304	ENSG00000189171	S100A13	6284	-0.986	-1.412	-1.199	ATATGCCCAAAGTCCCACAG	CCTGGTCCTCAGCTCACTTC
1307	ENSG00000137331	IER3	8870	-0.814	-1.581	-1.1975	TGGACCTCAGCACTTTCCTC	TCTCCTACTTTGCCGCAGTT
1306	ENSG00000180846	C19orf34	n.a.	-1.343	-1.052	-1.1975	ACCAGGGCAGCACATACTTC	GCCGTCTTTGTGATGGATTT
1308	ENSG00000167468	GPX4	2879	-0.623	-1.77	-1.1965	GCACATGGTTAACCTGGACA	GGGGCAGGTCCTTCTCTATC
1309	ENSG00000164167	LSM6	11157	-1.477	-0.915	-1.196	CTGGGAGAGGTCTGATGGTG	GGTTTGCTTCCGAAGACTCA
1311	ENSG00000087191	PSMC5	5705	-0.753	-1.637	-1.195	CTATTGCGGGAGGAGCTACA	GCCAACAGTGTCTTCCCAGT
1310	ENSG00000176078	n.a.	n.a.	-0.567	-1.823	-1.195	GTTGAACCCGCTTACAGGAA	GAGAGAGGACGTGGATGCTC
1312	ENSG00000139874	SSTR1	6751	-2.423	0.034	-1.1945	CGTGGCCAAGGTAGTAAACC	GGAAAGAGCGCTTGAAGTTG
1313	ENSG00000090372	STRN4	29888	-0.831	-1.556	-1.1935	TGCACTTTATCCAGCACGAG	TCGATCTGTTTCACCAGCAG
1314	ENSG00000183434	TFDP3	51270	-0.995	-1.391	-1.193	CGGGTGGAAAGACAGAAGAG	CACCTCCAAAAGTTCCCTGA
1315	ENSG00000127511	SIN3B	23309	-1.15	-1.236	-1.193	TCTGGACCAGGTGAAGATCC	TGCTCCTTCTGGTACGTGTG
1316	ENSG00000163283	ALPP	250	-1.275	-1.109	-1.192	ACAGCTGCCAGGATCCTAAA	CGTCAATGTCCATGTTGGAG
1317	ENSG00000183551	n.a.	n.a.	-1.14	-1.243	-1.1915	AAAGGCCTGTCGGAATTCTT	GTCATCATCTTGGGCCTCAT
1322	ENSG00000177575	CD163	9332	-0.603	-1.778	-1.1905	AAACATGATGGATGGGGAAA	GCTCAGATCTGCTCCCTTTG
1318	ENSG00000188986	COBRA1	25920	-1.317	-1.064	-1.1905	ATGATCGACAGCCAGGTCTT	CACGTTCTCCTTCCTTGGAG
1320	ENSG00000140632	AC020663.7	84656	-0.485	-1.896	-1.1905	ATGCCTGGATCAAAGTGGAA	CTAGACTCCGGGATGGTGAG
1321	ENSG00000139517	LNX2	222484	0.017	-2.397	-1.19	CATCAGCGTCTCTTTCCACA	TAATGCCAAGCTGTTCACCA
1323	ENSG00000160211	G6PD	2539	-1.381	-0.999	-1.19	CTGCAGATGCTGTGTCTGGT	CGGCTTCTTGGTCATCATCT
1319	ENSG00000129214	SHBG	6462	-1.584	-0.796	-1.19	GGGGATACCAACCCTAAGGA	TCCCGGGATTTGATTCTACA
1324	ENSG00000171421	MRPL36	64979	-1.129	-1.25	-1.1895	ATTCACCACAACATGGCAAA	TTTCCCCTGACTCCTTGATG
1325	ENSG00000197043	ANXA6	309	-0.603	-1.775	-1.189	AAGATGCTTGTGGTCCTGCT	ACTCGCCAGAGGTGTCATTC
1328	ENSG00000164822	DEFA6	1671	-1.263	-1.115	-1.189	TGCTCCTGCTCTCTCTCCTC	GGACACACGACAGTTTCCTTC
1326	ENSG00000126003	PLAGL2	5326	-1.373	-1.005	-1.189	CAGAGCTGAGAGCCTGTGTG	GTCCTTGCGGTGAAACATCT
1327	ENSG00000124105	n.a.	n.a.	-0.171	-2.207	-1.189	CGTGGTCCCAAGAAGCAT	GCCTCCTCAGGTGTAATACGA
1329	ENSG00000121281	ADCY7	113	-1.123	-1.253	-1.188	GAAGGAGCACGAGGAGTTTG	TGAAGGAGTGCCTGTTGATG
1330	ENSG00000105135	ILVBL	10994	n.a.	-1.188	-1.188	GCCATATCCTGGAGGTGAAG	AGTCACCGTGTTGGTGAGG
1331	ENSG00000137216	TMEM63B	55362	-0.938	-1.437	-1.1875	CTGCTGCTCACCGTCTACAG	TTCTCCTTCTCCCGCTTGTA
1332	ENSG00000185918	n.a.	n.a.	-1.231	-1.144	-1.1875	AGACCTGGGACAGAGGACTG	CAGAATGCCCAGAGTCTTCC
1333	ENSG00000094631	HDAC6	10013	-1.761	-0.612	-1.1865	CCATGGAAATTCTGGACACC	TTTCCTTCTGGGCTGGAGTA
1335	ENSG00000055070	C1orf144	26099	-1.347	-1.025	-1.186	AGTCCCTAGCACAGCGAGAG	TTCCCTTTCCATTGACTTGG
1336	ENSG00000105404	RABAC1	10567	-1.312	-1.059	-1.1855	GCAGAAGGACCAGCAGAAAG	AAGACACCTCACACGGGTTC
1334	ENSG00000185379	RAD51L3	5892	-1.728	-0.643	-1.1855	TCTGCAGACCTGGAAGAGGT	CCAGCATCTGGAAGATGTCA
1337	ENSG00000182256	GABRG3	2567	-0.627	-1.743	-1.185	TCCTGGGTGTCATTTTGGAT	TGTGAATACGCCCTTTCCTC
1338	ENSG00000140274	DUOXA2	405753	-1.545	-0.824	-1.1845	ACCTGGCGTCTGAAAGAGAA	GGTCCCCCTCACAGGTTAGT
1339	ENSG00000106003	LFNG	3955	-1.551	-0.818	-1.1845	AGATGGCCGTGGAGTATGAC	AGGTTCTCCAGGTGGGAGTG
1340	ENSG00000111780	AL021546.4	283459	-0.975	-1.393	-1.184	GCGCGACTGGAGAAAGCTA	GGAACTCACTGCCTTGTTGG
1341	ENSG00000109339	MAPK10	5602	-1.714	-0.652	-1.183	AAATCTTTCAGCCTGCTTCTTC	CATGTGGTACCCCAGTGCAT
1343	ENSG00000141524	TMC6	11322	-1.372	-0.992	-1.182	CAGCGTGCTCTCCTACTTCC	CCTTGTAGTCCCAGGAGCAG
1344	ENSG00000134905	CARS2	79587	-1.943	-0.421	-1.182	TGTGTTTGGTGCCATCATCT	CCCGACAGGAAGCTTTAACA
1342	ENSG00000171530	TBCA	6902	-0.811	-1.552	-1.1815	CTAAATAGCCGCAGCCTCTG	AATGCAAAAACCACCCCATA
1345	ENSG00000124256	ZBP1	81030	-1.577	-0.785	-1.181	AAAGCATGGACGATTTACCG	CAGCAGTGGCAGAGACTGG
1346	ENSG00000174100	MRPL45	84311	-1.816	-0.545	-1.1805	AAATCGGACCGTTCCATACA	CTCCAGGACATCCTTGGGTA
1347	ENSG00000124226	RNF114	55905	-0.791	-1.569	-1.18	CATGGCTGCCGTAAGAATTT	CTCTGCTCACTGGTCGATGA
1348	ENSG00000177180	n.a.	n.a.	-1.18	n.a.	-1.18	CCAGGATCTCCTTGGTGAAG	CGCTGGAATCTTCTTTCCTG
1349	ENSG00000142856	ITGB3BP	23421	-1.072	-1.287	-1.1795	TTTCCCGAATCTCAGAATGC	TGCACAGGAGATTCCAATGA
1350	ENSG00000184898	RBM43	375287	-1.941	-0.418	-1.1795	TAAGAATGAGGGCGGAGATG	CAAGCACAAGCATTTCTCCA
1351	ENSG00000110925	CSRNP2	81566	-1.285	-1.073	-1.179	CTCCTACCACTGCCAGCTTC	TTCAGCATCAATACGGTGGA
1353	ENSG00000084092	C4orf14	84273	-0.425	-1.931	-1.178	CAGGATGCTCCTGGCTACC	GGAGTTGGGTTGCAAATAGG
1352	ENSG00000164736	SOX17	64321	-1.489	-0.867	-1.178	CGCACGGAATTTGAACAGTA	TTGACAATCCAACTATGGGAAA
1354	ENSG00000115194	SLC30A3	7781	-1.713	-0.642	-1.1775	TGTTAATGGCCTTTGTGCTG	TGCAGAGGCAACATGGTAAG
1356	ENSG00000133835	HSD17B4	3295	-0.953	-1.4	-1.1765	GCCAGCAAGCCTCAGAGTAT	TTTTCCTGCTCTGGGAAGTG
1355	ENSG00000147130	ZMYM3	9203	-1.171	-1.182	-1.1765	GACCATTGAGGAGCTGAAGG	TTGAGCCCGGTACAACTAGG
1358	ENSG00000100462	PRMT5	10419	-1.145	-1.207	-1.176	TGCAGTGGCTCTTGAAATTG	GGCCTGCTGGTACTGAGAGT
1357	ENSG00000104728	ARHGEF10	9639	-1.275	-1.077	-1.176	AAAGCCCGCTTTTCTTGAAT	ACATGAAGACTCGGCGTTCT
1359	ENSG00000167363	FN3K	64122	-1.621	-0.731	-1.176	GAAGAGGTGAGGGTGCTGAG	AGTGGTTCCAGTGGTTCAGG
1363	ENSG00000123136	DDX39	10212	-0.595	-1.755	-1.175	CAGCGTCAAGGTGTCTGTGT	GATCAAAGAGCTTGCGGTTC
1361	ENSG00000198162	MAN1A2	10905	-1.269	-1.081	-1.175	GATGCAGGGCCAGTTACAAT	CTGCATCTTTGCCAACTCAA
1362	ENSG00000090971	NAT14	57106	-1.329	-1.021	-1.175	CTACACGCTGGTGAGGGAAT	GTCGCAAACCCTAACTCTGG
1364	ENSG00000132016	C19orf57	79173	-1.005	-1.344	-1.1745	ATGATGGGTGCTGGAGATTC	TGTTCCCCGAAGGAAAGAG
1360	ENSG00000184984	CHRM5	1133	-1.203	-1.146	-1.1745	CAAAGTCAACAGCCAGCTCA	TCTGTTTCCCGGTAGATTCG
1365	ENSG00000100297	MCM5	4174	-1.335	-1.012	-1.1735	CCCATTGGGGTATACACGTC	TCACGTGCAGAGTGATGACA
1367	ENSG00000181908	AP003774.4	n.a.	-0.531	-1.815	-1.173	AGTCGAGAGCTGGAGTCAGG	TCCCTCAGGCTGTCACTCTT
1368	ENSG00000198133	C14orf83	161145	-0.87	-1.476	-1.173	GTATGCCATCCACGGCTACT	GTGTTGCGGATGATGAACTG
1369	ENSG00000184922	FMNL1	752	-1.179	-1.167	-1.173	CTACGCGCCATCATGAACTA	CACCTGCAGCTTGTCACTCT
1366	ENSG00000149927	DOC2A	8448	-1.866	-0.48	-1.173	CGCTGGAGTTTGACCTTCTC	TAACAGGAGATGCCCCTCAG
1370	ENSG00000125780	TGM3	7053	-0.989	-1.355	-1.172	GGTGTTCGAGAGGGTGATGT	AGATGATGGTCCAGGCTGTC
1371	ENSG00000131979	GCH1	2643	-1.184	-1.16	-1.172	CCTACTCGTCCATCCTGAGC	TAAGGCGCTCCTGAACTTGT
1372	ENSG00000109881	CCDC34	91057	-1.059	-1.284	-1.1715	GGACTCCTGCTCAGTCCCTA	TCCTCTAGAGCTTTCAGTTGCAG
1373	ENSG00000088833	NSFL1C	55968	-1.214	-1.129	-1.1715	AAGGGGTGAGTTTTCTGTGC	TGTTGGTTCTTGGCTCATTG
1375	ENSG00000165916	PSMC3	5702	-0.699	-1.643	-1.171	AGTGACTCGGCAGGAGAAGA	CACCAGGTCTCCTGGCTTTA
1374	ENSG00000100147	CCDC134	79879	-1.362	-0.98	-1.171	TGTTGGCACTGAAGAACCTG	ATCTCCTTCCGCTTCTCCTC
1377	ENSG00000089250	NOS1	4842	-0.811	-1.529	-1.17	ACCAAAGCCGTGGATCTGT	TTCCCCCATAGGTCATTGAA
1378	ENSG00000123933	MXD4	10608	-1.019	-1.321	-1.17	CCCACGGTCTGTTCTCAGAT	CAGGTGTGTCTGCATGTGTG
1382	ENSG00000119559	C19orf25	148223	n.a.	-1.17	-1.17	GGATCCAGTGTTCACCATCC	CAACTCGGCATGAATGAGAC
1381	ENSG00000132681	ATP1A4	480	-1.267	-1.073	-1.17	AACCTTGGAAGAGCTGAGCA	CTCCCAACACCACCTCTTGT
1376	ENSG00000137504	CREBZF	58487	-1.853	-0.487	-1.17	AAAAGAGGCGGAGAAAGTCC	CAGGTCCTGCTTCTGCTTTC
1379	ENSG00000141522	ARHGDIA	396	-1.17	n.a.	-1.17	GAGCCTGCGAAAGTACAAGG	GAGATTCCACTCCCAGGACA
1380	ENSG00000148671	C10orf116	10974	-0.803	-1.536	-1.1695	TGCTCTTGACGACTCCACAG	AACATTCCTGAGACCGTTGG
1384	ENSG00000167513	CDT1	81620	-1.007	-1.332	-1.1695	GTAGGCGTTTTGAGGAGTGC	CTTCTCCATCCTGGGTGAAA
1386	ENSG00000180539	C9orf139	401563	-1.048	-1.291	-1.1695	GCCCCTGAAATCACAGCTAC	CTTTAGCTTCCGGCAAAGAG
1385	ENSG00000105610	KLF1	10661	-1.251	-1.088	-1.1695	CCACTACCGGAAACACACG	CTGGGAGCTGGTCTGAGTGT
1383	ENSG00000160691	SHC1	6464	-1.315	-1.024	-1.1695	GGTGTGGTTCGGACTAAGGA	ATCAGGTTGGCACAGGAAAG
1387	ENSG00000176381	PRR18	285800	-0.973	-1.364	-1.1685	GGCTCCTCTCCAGCTCCT	CAGCGACACCTTGAGCATC
1388	ENSG00000028277	POU2F2	5452	-0.263	-2.073	-1.168	CCCCTTACCAGCCTTGATG	TCCCTTGTCACTCCTGCTCT
1390	ENSG00000082684	SEMA5B	54437	-1.393	-0.943	-1.168	AGACTCAGCCTTGCCAATGT	GGCTCATTAAGCCACTTGGA
1389	ENSG00000179403	VWA1	64856	-1.488	-0.848	-1.168	GGTCCTGGACGTTGATAGGA	GCAAGAAGATGGTGTGGTTG
1392	ENSG00000008517	IL32	9235	-1.599	-0.737	-1.168	AGCTGGAGGACGACTTCAAA	TTGAGGATTGGGGTTCAGAG
1391	ENSG00000143819	EPHX1	2052	-0.61	-1.725	-1.1675	CGAGCCATGTGGCTAGAAAT	CTTCTTGGAGGATGCCTCTG
1393	ENSG00000108669	CYTH1	9267	-0.616	-1.718	-1.167	AGAGGAGTGGTGGGAGGAAT	CCCTGTCAACAACTTTCAGTCA
1394	ENSG00000185825	BCAP31	10134	-0.639	-1.694	-1.1665	TGCATTCCCTTCATTTCTCC	TCAACAGCAGCTCCCTTCTT
1396	ENSG00000165527	ARF6	382	-0.392	-1.94	-1.166	GAGAGGCTTCGTTTCGGTTT	CTCATCTCCCGGTCATTGAT
1395	ENSG00000185739	SRL	6345	-1.18	-1.152	-1.166	GACCCAACAAAGCTGGATGT	GGGAAGGTCAAATTTGCTGA
1397	ENSG00000062598	ELMO2	63916	-0.059	-2.271	-1.165	TGGAAAGTGGAACCAAGCTC	TCGGATCACATGATTCAGGA
1398	ENSG00000169750	RAC3	5881	-0.734	-1.596	-1.165	GGGAAGACATGCTTGCTGAT	GGCTGAGCACTCCAGGTATT
1399	ENSG00000165125	TRPV6	55503	-1.235	-1.095	-1.165	GCCTATGGAGCAAGTTCTGC	ATGAGGTTGCAGGGACTACG
1400	ENSG00000170442	KRT86	3892	-1.789	-0.541	-1.165	GGGCTACATCGAGACTCTGC	GCTCGTTGATCTCCTCCTTG
1401	ENSG00000010327	STAB1	23166	-0.793	-1.536	-1.1645	CTTCTCCTCCAGGACCATGA	AAGCTGTCCACAGCCTCATT
1402	ENSG00000147647	DPYS	1807	-1.692	-0.636	-1.164	GACCTGGAGCTGTACGAAGC	TCTGGCAGGTGTTGAAAGTG
1403	ENSG00000163346	PBXIP1	57326	-0.613	-1.714	-1.1635	ACAGCAGGATCTGGAGAGGA	GTTTCCAGTGCTCAGCCTTC
1405	ENSG00000143207	RFWD2	64326	-0.721	-1.606	-1.1635	ATGACAGTCGAACTGCAAGC	CACAGCTTCACTTTTGCATCA
1404	ENSG00000167971	CASKIN1	57524	-1.776	-0.551	-1.1635	GGATTTCCCCAGAGAAACAA	GAGAGCAAGGCACAACCTC
1406	ENSG00000177548	RABEP2	79874	-1.428	-0.898	-1.163	AATGGTGAGGCCGAGTCA	GCTCCTCGATCTCCTTTTCC
1407	ENSG00000180964	TCEAL8	90843	-1.938	-0.388	-1.163	GCATTTGGACCCTGAAGAAA	ATGCTGCTTTGCCATAACCT
1408	ENSG00000188400	n.a.	n.a.	-0.481	-1.844	-1.1625	CGCTGCTGAGTTGAGTGTGT	TTAGGGCTGCTGTTTTTGCT
1409	ENSG00000142751	GPN2	54707	-1.96	-0.365	-1.1625	CCTTTCCAAGATGGACCTCA	CTTTCCCCAGTGCTGGATTA
1412	ENSG00000100124	ANKRD54	129138	-0.781	-1.543	-1.162	CAATGGCAATGACCAGATTG	GCAGACTGAGGGAGGTGAAG
1411	ENSG00000100097	LGALS1	3956	-1.143	-1.181	-1.162	CTCTCGGGTGGAGTCTTCTG	TTTCAGTCAAAGGCCACACA
1410	ENSG00000099800	TIMM13	26517	-1.963	-0.361	-1.162	CACGGGTAGCTCGTGTAGGT	ATGCACTTCTGCTCGGAGTT
1413	ENSG00000087586	AURKA	6790	-1.45	-0.873	-1.1615	GCCCTCTGGGTAAAGGAAAG	ACTGACCACCCAAAATCTGC
1414	ENSG00000054282	SDCCAG8	10806	0.132	-2.453	-1.1605	TTGTAACCGTGTTGGTGGTC	TGATCCCATGTACTCCCTTTC
1416	ENSG00000100365	NCF4	4689	-0.28	-2.041	-1.1605	GCCAAAGTCTACGTGGGTGT	TCACGAAGGAGAGAGGGAAG
1417	ENSG00000157600	TMEM164	84187	-1.527	-0.794	-1.1605	TAGTAGCCCTGTGCCTGACC	GAACAGGATGACCAGCTTCC
1415	ENSG00000130560	UBAC1	10422	-1.625	-0.696	-1.1605	CTTCCCAAGATGGCTGATGT	CGTGTCTATGGTCGGGTCTT
1418	ENSG00000182463	TSHZ2	128553	-1.222	-1.098	-1.16	AGCTGGAAATGGATGTCAGG	TCCTCTTCGGCAGCTATTGT
1419	ENSG00000103490	PYCARD	29108	-1.388	-0.932	-1.16	CTTGGACCTCACCGACAAG	GCTGACCGGAGTGTTGCT
1420	ENSG00000135144	DTX1	1840	-0.867	-1.452	-1.1595	TTCCTCCGGCATAAGAGAGA	AGCACGTTCTCAATGTGGTG
1422	ENSG00000185736	ADARB2	105	-1.563	-0.756	-1.1595	TGTACCTGCAGAGCATCGTG	GCTGCTGTTTCACAGACTGG
1421	ENSG00000137726	FXYD6	53826	-1.133	-1.185	-1.159	TGATTTAGGGATGCGTAGGG	CTCAGAAGCAGGGAAGGTTG
1424	ENSG00000104853	CLPTM1	1209	-0.693	-1.624	-1.1585	ACATCCTGGACAACGAGACC	GGTCGTCGATGAATGTGTTG
1423	ENSG00000151962	RBM46	166863	-1.854	-0.463	-1.1585	AATGGTCAGCATAGCCCAAG	AAGGAGGCCTGATTGGAGAT
1425	ENSG00000161571	n.a.	n.a.	-1.219	-1.097	-1.158	AAGGCAGCAGTCTCTGTGCT	GAGAATGGAAGCCTGTTTGC
1427	ENSG00000167775	CD320	51293	-1.025	-1.29	-1.1575	TGCCTATGGGGTTATTGCAG	TAAGCACAGGGCCGTTCTAC
1426	ENSG00000196155	PLEKHG4	25894	-1.214	-1.101	-1.1575	TCCTGAAGTGCCGAGAAGTT	TGGTCACAGCAGATCCAGAG
1428	ENSG00000117266	PCTK3	5129	-0.777	-1.537	-1.157	CCTCACCCTGGTGTTTGAGT	AGCTCCTCCTTGACTGTGGA
1429	ENSG00000132471	WBP2	23558	-1.255	-1.059	-1.157	CGTCAATAACACCGAGAGCA	GGTACATTCCATTGGCGACT
1430	ENSG00000129354	AP1M2	10053	-0.645	-1.668	-1.1565	TTGAGCACTTCATGCCTTTG	GCTTGATGGTACCGACGATT
1432	ENSG00000175970	UNC119B	84747	-0.499	-1.813	-1.156	TTTCACCCGCTTCAAAATTC	GTCAGAGCGGGTCTCGTAAG
1431	ENSG00000130055	GDPD2	54857	-1.488	-0.824	-1.156	GCATCATGGAACCCAGAGAC	CTGCAGCTTCCTCCAATAGC
1434	ENSG00000138771	SHROOM3	57619	-1.091	-1.219	-1.155	TGGCTTCCAGACTCCAAACT	TTCCTCTTGCCTTCACATCC
1435	ENSG00000179960	n.a.	n.a.	-0.268	-2.041	-1.1545	ATTGTGGGCACTATGGAAGC	AAAGTTGGGCCTCAGAAACA
1433	ENSG00000142273	CBLC	23624	-1.44	-0.869	-1.1545	TCTACCTGGCCAATCTGGAG	GAAAGAGCCTGGTGAAGACG
1436	ENSG00000189391	n.a.	n.a.	-1.613	-0.695	-1.154	GACCAGGCTGAGGAGTTCAG	TCCTTAAAGGCCTGTTGCTG
1438	ENSG00000132475	H3F3B	n.a.	-0.973	-1.334	-1.1535	GGATTTCAAAACCGACCTGA	GTATCACCCATCCCTTCTGC
1439	ENSG00000174951	FUT1	2523	-0.991	-1.315	-1.153	CCTGCCAGACTCTGAGTTCC	AGGACCCAGGGGAGAAGTAA
1437	ENSG00000184992	BRI3BP	140707	-1.153	n.a.	-1.153	GTGGTGGCCGTCTACTTCAT	TCCCCCACTAATTACACTTCG
1441	ENSG00000187860	CCDC157	550631	-0.955	-1.35	-1.1525	CACGACCTTCAAGAACACCA	AGACAGGCACTGCTCATCCT
1440	ENSG00000152969	JAKMIP1	152789	-1.566	-0.738	-1.152	AAACGTTGTCCGAAACATCC	GGCGTCTTGCATTTCATTCT
1442	ENSG00000119138	KLF9	687	-1.875	-0.429	-1.152	TTCATCACCCCTGTCCTCTC	CAATCCGACTGTTCCGTTTC
1443	ENSG00000198246	SLC29A3	55315	-0.949	-1.354	-1.1515	CGCTTCTGTGGCACATACAT	GTGCCTGGGAGTTCCTCATA
1444	ENSG00000176383	B3GNT4	79369	-0.787	-1.515	-1.151	TGACATCCTCCAGTGGGACT	CTCAGGCACATACCCACAAA
1445	ENSG00000112561	TFEB	7942	-1.45	-0.852	-1.151	GCGGCAGAAGAAAGACAATC	GTGGCTGAAGTCCAGGTGAT
1447	ENSG00000116983	HPCAL4	51440	-1.082	-1.219	-1.1505	GTGGTACAAGGGCTTCCTGA	TGGTCGTCCTTATCCTGGTC
1446	ENSG00000173464	RNASE11	122651	-1.249	-1.052	-1.1505	ATACCAGCCTCAGCATGTCC	AGCCACAAACTAACCAGCTCA
1449	ENSG00000176476	CCDC101	112869	-0.941	-1.359	-1.15	CGGATGCAGACAGAGAACAA	CATACTTGTTGGTGGCATGG
1448	ENSG00000110446	SLC15A3	51296	-1.174	-1.126	-1.15	GCTGATTCTGGTCCCTCTGA	GTCCAGCGATCCAGACAAAT
1450	ENSG00000182253	SYNM	23336	-1.229	-1.07	-1.1495	ACCGTCATTCTGGGAAAGAA	TGCTACGGTTTCTGTCATGG
1451	ENSG00000188830	n.a.	n.a.	-0.452	-1.846	-1.149	GAGCGAGAAGCAGAAGCTGT	CAAGTCGTCCTCCAAGAAGC
1452	ENSG00000188883	KLRG2	346689	n.a.	-1.149	-1.149	CAAACTGCAGCACTCCAAGA	ACAACGGCAGACTCATTTCC
1454	ENSG00000114378	HYAL1	3373	-1.077	-1.219	-1.148	CTGGGACACCAAGGACATTT	ATCTGGACATAGGGCAGCAC
1453	ENSG00000115592	PRKAG3	53632	-1.974	-0.322	-1.148	CCAGATCTACATGCGCTTCA	GATGTGCAGGAACTTGAGCA
1457	ENSG00000171595	DNAI2	64446	-0.988	-1.306	-1.147	ATGCAGCTCGGCTCTATCAT	GTCCCAGCAGGCTATCTGTC
1459	ENSG00000164983	TMEM65	157378	n.a.	-1.147	-1.147	CATCTACAGCCTGCACTCCA	CAGCTTTGCCCAAATGTGTA
1456	ENSG00000138028	CGREF1	10669	-1.294	-1	-1.147	CTGAAGTGCAGCATCAGCTC	AGGGGCTTCCTGTGTTTCTT
1455	ENSG00000064201	TSPAN32	10077	-1.051	-1.242	-1.1465	TGGTATATGAGCAGGCGATG	CGGAGTGGAGACAATGTGTG
1458	ENSG00000170727	BOP1	23246	-1.162	-1.131	-1.1465	ACACCCAGGTGCTGATTCAC	AAGATGACGTCCAGCACTCC
1460	ENSG00000169174	PCSK9	255738	-1.075	-1.217	-1.146	CAGGCATTCAATCCTCAGGT	TCAGTTCCTGCTGTGTGAGC
1463	ENSG00000189067	LITAF	9516	-0.96	-1.331	-1.1455	TTCCTGCAACAAGATGATCG	TTGCAAGTCCTATGCACGAC
1461	ENSG00000136206	SPDYE1	285955	-1.794	-0.497	-1.1455	CACAGTGGCCTGGTTTCTTT	TCGCTTCAGCTTCATCTTGA
1462	ENSG00000070371	CLTCL1	8218	-1.829	-0.462	-1.1455	CAGTGGCTATGCAGATTGGA	CGAAGTACTGCAGCAATGGA
1464	ENSG00000185776	n.a.	n.a.	-1.401	-0.889	-1.145	AAGCGTCAACTGGTGCTTCT	CTGATCGTCATCCTCCAGGT
1465	ENSG00000157593	SLC35B2	347734	-0.793	-1.496	-1.1445	AGTCATGGACCCAGCTATGG	CAGCACTCGGTTCATTAGCA
1467	ENSG00000127125	PPCS	79717	-1.485	-0.803	-1.144	CCTGGCAGTAGAGTTCACCA	CTTGGTTTCCGAGTCTTTGG
1466	ENSG00000168427	KLHL30	377007	-0.859	-1.428	-1.1435	CCAGACTTCCCCGACTATCA	ACACTCCACGCATCTGTGAC
1468	ENSG00000196756	RP4-564F22.2	n.a.	-1.143	n.a.	-1.143	CTTGATTTTTCCCACGCTGT	GCACACAGGACAGAGGTCAG
1469	ENSG00000007171	NOS2	4843	-1.302	-0.983	-1.1425	GCAATGAATGGGGAAAAAGA	TCCTTTGTTACCGCTTCCAC
1470	ENSG00000175854	C9orf119	375757	-1.508	-0.777	-1.1425	AGAGGGACATGCTGGACAAG	ACTGCGACATTTCAGGAACC
1472	ENSG00000187987	ZSCAN23	222696	-1.965	-0.32	-1.1425	GGAAGGACTTCTGGCAGTGA	AATCTCCCTCTTTGGGGCTA
1471	ENSG00000100441	KIAA0323	23351	-2.064	-0.221	-1.1425	GACCTCCGCCATATTGTCAT	TGGCTGGCTTCTTCAGAAAT
1473	ENSG00000100335	SMCR7L	54471	-1.026	-1.258	-1.142	AGCAAGCTGCTGTGGACATA	TCACGCTCATACTGCACCTC
1474	ENSG00000164694	FNDC1	84624	-2.039	-0.244	-1.1415	CACTTGCCCATTGAGAACCT	CATAGGACTGAGGCCCTGTT
1475	ENSG00000196167	C11orf92	399948	-1.248	-1.034	-1.141	GAAAAGCCGTGGAAACACAC	AAGGGGTCTCACTCCCTGTT
1476	ENSG00000128284	APOL3	80833	-0.848	-1.433	-1.1405	AGCATCGTGGAGCACTCATA	GATTCTCCTCCAGCTCCTGA
1477	ENSG00000136826	KLF4	9314	-1.649	-0.631	-1.14	AGAAGGATCTCGGCCAATTT	GGTCTCTCTCCGAGGTAGGG
1478	ENSG00000188976	NOC2L	26155,100133473	-1.541	-0.739	-1.14	GCCTCACTCCAAAGCTGTTC	CAGAGACTCTTCCCCAGTGC
1479	ENSG00000159713	TPPP3	51673	-1.083	-1.196	-1.1395	CTGACGGACACCAGCAGATA	CATGAGGCTACAGGCACAGA
1480	ENSG00000185745	IFIT1	3434	-2.34	0.061	-1.1395	GATGACGATGAAATGCCTGA	TAAAGCCATCCAGGCGATAG
1481	ENSG00000139988	RDH12	145226	-1.139	n.a.	-1.139	CCTGGCAAGGTAGTGGTGAT	AGGTCGTGGAAGGGAATCTT
1482	ENSG00000132975	GPR12	2835	-0.811	-1.464	-1.1375	GACGTACCATTCGGAGAGGA	TGACAGGGTTGATGATGGAA
1483	ENSG00000100918	REC8	9985	-1.315	-0.959	-1.137	GAATCGAGGGTGAAAGACCA	TCCACAGACATCATCCCAAA
1484	ENSG00000116649	SRM	6723	-0.884	-1.389	-1.1365	ATCCTCGTCTTCCGCAGTAA	CATCTTCCTTGAGGGCTGTC
1485	ENSG00000003987	MTMR7	9108	-0.905	-1.367	-1.136	TGCAGAAAATGCTGGAAGTG	CAAAGGCACAGGGAAATTGT
1487	ENSG00000137267	TUBB2A	7280	-0.763	-1.509	-1.136	TGACTTGCAGCTGGAGAGAA	ACAGGGCCTCGTTATCAATG
1486	ENSG00000073111	MCM2	4171	-2.082	-0.19	-1.136	GCGTGACAACAATGAGCTGT	AGCAGGCTTGGAGAAACAAA
1488	ENSG00000141698	NT5C3L	115024	-1.441	-0.83	-1.1355	AATTGAGATCGACCCACACC	CATTGGTTTTGCCCTCAAGT
1489	ENSG00000175130	MARCKSL1	65108	-1.705	-0.565	-1.135	CTCACCCACAGAGGAAGAGC	CAGATGGCTGATGGGAGAAT
1490	ENSG00000146063	TRIM41	90933	-1.438	-0.831	-1.1345	AGGATCTAGACCCCGTCACC	GTTCTGTCACTCGCCTCTCC
1491	ENSG00000137090	DMRT1	1761	-0.5	-1.768	-1.134	TTACTACCCGCCTCCCTCTT	CCATGCAGATGGTAGTCACG
1492	ENSG00000107281	NPDC1	56654	-0.235	-2.032	-1.1335	GCCCAGACTGGAAGATGAGA	TCCTTGGGTGGCTCTTTATG
1493	ENSG00000156687	UNC5D	137970	-1.255	-1.011	-1.133	CCAGAGCTCGTTCATGGTTT	GTCAATGCAAAGGGAGTGGT
1494	ENSG00000182208	AC091196.6	81532	-1.305	-0.961	-1.133	CAAGCCTAATGGCAAGAAGC	AAGTGGGCCCAGTAGATGTG
1496	ENSG00000042832	TG	7038	-1.122	-1.143	-1.1325	TTGCCTGCATGACTTCTGAC	CATTAGCCCAGGCTTCAGAG
1495	ENSG00000125378	BMP4	652	0.313	-2.578	-1.1325	AGCAGCCAAACTATGGGCTA	GGCTTTGGGGATACTGGAAT
1497	ENSG00000187947	n.a.	n.a.	-0.487	-1.776	-1.1315	GGTCTCCTGGGTGTGCTTAC	AGCTCAGGGATGCTAACCAA
1499	ENSG00000100612	DHRS7	51635	-1.034	-1.228	-1.131	TGGTCAACAATGGTGGAATG	ATTAACATCAGCCGCACACA
1500	ENSG00000137376	n.a.	n.a.	-1.07	-1.192	-1.131	GGACCACTGATTCCACCACT	GTGATGCAACACCACTCTGG
1498	ENSG00000170606	HSPA4	3308	-1.388	-0.874	-1.131	GCAGTACCCACTGGAAGGAC	TTCTGCCTCCACAAATGGAT
1501	ENSG00000160180	TFF3	7033	-1.902	-0.359	-1.1305	CAAGCAAACAATCCAGAGCA	GCAAAGGGACAGAAAAGCTG
1502	ENSG00000137349	n.a.	n.a.	-1.703	-0.557	-1.13	AGTTCCTGTTGCTGGACACC	TTATCTGCTGGGCTGTGATG
1503	ENSG00000166689	PLEKHA7	144100	-0.874	-1.386	-1.13	TCACCTTAGGTCCCTTTGGA	CCAGACCTCTGCCAATGACT
1504	ENSG00000174516	PELI3	246330	-0.868	-1.391	-1.1295	CGTGCCAGGATCAGAGTACA	TCACAGCCGACACTCTTGAC
1505	ENSG00000099769	IGFALS	3483	-1.662	-0.596	-1.129	AACAACTCACTGCGGACCTT	TTCGATTGCCTTTGCCTTTA
1506	ENSG00000105699	LSR	51599	-1.431	-0.826	-1.1285	AGCAGGTCTCCCACGAGTAA	TCAGGGCCAAGTTCTTCTTG
1508	ENSG00000137392	CLPS	1208	-0.575	-1.681	-1.128	GATCCTGATCCTCCTGCTTG	TTGCAGGAGGCCTTTAATTG
1507	ENSG00000177398	UMODL1	89766	n.a.	-1.128	-1.128	AGGCAGAAAAGCAACCTCAA	ATTCTCTGGTAGCGCACGAT
1511	ENSG00000173991	TCAP	8557	-0.991	-1.264	-1.1275	AGCCTCTTGCACCATGAGTT	TAGTCCCCAGTCACCCTCAC
1509	ENSG00000089127	OAS1	4938	-2.141	-0.114	-1.1275	AGGCAGTTCTGTTGCCACTC	AGCCTGGACCTCAAACTTCA
1510	ENSG00000152804	HHEX	3087	n.a.	-1.127	-1.127	GATTCTCCAACGACCAGACC	CAATGCCAGTGGTCATCATC
1512	ENSG00000116584	ARHGEF2	9181	-0.402	-1.851	-1.1265	GGAATCCCTCATTGACGAAG	AGGACCTGAGAACTGGCTGA
1513	ENSG00000197445	C16orf47	n.a.	-0.483	-1.77	-1.1265	CAGCTTTGCCGGAATTAGAG	CCGATAGGAATGTGGAGGAA
1516	ENSG00000048471	SNX29	92017	-1.195	-1.058	-1.1265	AGTGGGAGACTGTGGCAAAT	CAGTCTCGCTGCTTTCTGTG
1517	ENSG00000143067	ZNF697	90874	-1.35	-0.902	-1.126	CGAGAAGCCCTACATGTGCT	ACAGGTGCAGCTTCTGGTG
1515	ENSG00000186377	CYP4X1	260293	-0.139	-2.113	-1.126	GATTTGCAGCACTCAGGACA	CCAGGCAGTAAAGGATCCAG
1514	ENSG00000176951	n.a.	n.a.	-0.492	-1.76	-1.126	CATTTGCAGACCCCTCAGAT	GGTGAAGCCTTGTGGAAAAA
1518	ENSG00000198003	CCDC151	115948	-1.653	-0.599	-1.126	GCACATTACCAGCGTGTACC	TCCTTGACCTTGCCAAAGAT
1519	ENSG00000072182	ACCN4	55515	0.205	-2.456	-1.1255	CTGCAATATCAACCGCTTCC	GTGGATCTGCACCCGAATAC
1521	ENSG00000106683	LIMK1	3984	-0.845	-1.405	-1.125	GGGGTGCTCTACAAGGACAA	TCCCAAAGGAGAACACATCC
1520	ENSG00000162062	C16orf59	80178	-1.035	-1.215	-1.125	ACACCCAGTCCACAAGACCT	CCCCTTCTCCTTGAGTGTGA
1522	ENSG00000176194	CIDEA	1149	-0.529	-1.72	-1.1245	AGACCTTGGGAGACAACACG	TTGAGCCAAACGAAACACAG
1524	ENSG00000137731	FXYD2	486	-0.862	-1.387	-1.1245	CATTCACCTGGGGAAATGAC	GTGACGGGGACAAAGGTCTA
1523	ENSG00000137168	PPIL1	51645	-2.21	-0.039	-1.1245	CAGCCACCCAACGTTTACTT	TGACTTGCAAAGCCAAAATG
1525	ENSG00000172037	LAMB2	3913	-1.138	-1.11	-1.124	ACTCAGCTCGAGGCAGACCT	CCCACACACCAGCTCATTTA
1526	ENSG00000007565	n.a.	n.a.	-0.859	-1.388	-1.1235	AGAGGAAGAAGCAGCAGCAG	TCTCATGCACTGACCTTTGC
1528	ENSG00000184451	CCR10	2826	-0.896	-1.351	-1.1235	CTGCTGGATACTGCCGATCT	TAATGTGGCAAGGCACAGAG
1527	ENSG00000171094	ALK	238	-2.934	0.687	-1.1235	GCCAGAAACTGCCTCTTGAC	GCAAAGCGGTGTTGATTACA
1529	ENSG00000023608	SNAPC1	6617	-2.313	0.067	-1.123	CCCAAGTGATCGTGTGATGA	CCCTTGACCAGATGCAGAAT
1531	ENSG00000137801	THBS1	7057	-0.976	-1.268	-1.122	ATGGAATTGGTGATGCCTGT	GTTCTGGTGGCCATCTTCAT
1530	ENSG00000126464	PRR12	57479	-1.132	-1.112	-1.122	AGGACATCCCTTCCCTCAAG	CCGTCTCAGGAGTCTGCTCT
1532	ENSG00000074219	TEAD2	8463	-1.282	-0.961	-1.1215	AAGACCCGAACTCGAAAACA	TTCCACGAAGGCTGAGAACT
1533	ENSG00000078018	MAP2	4133	-1.121	n.a.	-1.121	CGGACGTGTGAAAATTGAGA	GTGGCAAGCTGAGGAGATTC
1534	ENSG00000176153	GPX2	2877	-1.798	-0.443	-1.1205	CCTTCACCCTTGTCCAAAAA	AGAGGGTTGGGAGAGGAAAA
1535	ENSG00000172362	OR5B12	390191	-0.607	-1.633	-1.12	AATGGCCTATGACCGCTATG	TTGTCTGTGCCCATGAAATG
1536	ENSG00000137409	MTCH1	23787	-0.629	-1.61	-1.1195	TGGGGAGGAAGGTCCTCTAT	GGTTACAGCCCCACAAGAAA
1537	ENSG00000057252	SOAT1	6646	-1.091	-1.146	-1.1185	GAACGTGCCTCGGGTACTAA	AAACAGCCAAGGCATATTCG
1538	ENSG00000161558	TMEM143	55260	-0.857	-1.379	-1.118	TCCTAGCCAAGTCAGGCTGT	GCGGTTTACAGAAGCCAGAG
1539	ENSG00000197639	n.a.	n.a.	-0.781	-1.453	-1.117	TGCATGGAGGTGGTCTATGA	TCCCAGAAGTGGTTCCTTTG
1541	ENSG00000150938	CRIM1	51232	-1.186	-1.048	-1.117	ATTGCCTCAGTTGTGGTTCC	AGAGCCCATCCCAGTAAGGT
1540	ENSG00000146618	FERD3L	222894	-1.325	-0.909	-1.117	GGACACTACGGTGCTGGACT	CTCTCCAAGAGCTCGGTCAT
1542	ENSG00000103876	FAH	2184	-1.629	-0.605	-1.117	TCAGCATCATCAAGCACCTC	CAATCTGTTTCCAGGGCCTA
1543	ENSG00000148331	ASB6	140459	-1.8	-0.433	-1.1165	ATTTGTGCCCAGCATTTTGT	TCTAGCCCTGCACCCTCTTA
1546	ENSG00000129083	COPB1	1315	-0.533	-1.699	-1.116	TCCTGTTCTGTCCGATTTCC	TTCCTCTTTCTTGGTGGGTCT
1544	ENSG00000090530	LEPREL1	55214	-0.312	-1.92	-1.116	GAGAATTACAGGGCGACAGC	GATAGGCTTTGGCACACTCC
1545	ENSG00000138735	PDE5A	8654	-1.643	-0.588	-1.1155	ACCGCTATTCCCTGTTCCTT	AGCAGCACCTGATTTCTCTTG
1547	ENSG00000115129	TP53I3	9540	-0.256	-1.974	-1.115	AATGCAGAGACAAGGCCAGT	GCTTTTCTGCCATTTGAAGC
1548	ENSG00000146555	SDK1	221935	n.a.	-1.115	-1.115	CTCCGCCTCAGCAGTTTATC	TGAGAGGCCTTGGATCTTGT
1550	ENSG00000164620	C5orf16	285613	-0.129	-2.1	-1.1145	TAAGAATGCCGTCCCATCTC	GGAAGAAGACCAGCACAAGC
1549	ENSG00000182077	n.a.	n.a.	-0.949	-1.28	-1.1145	ATGCGGCTGCTGTACTACCT	AGACACTGCCGCTTTTGAAT
1551	ENSG00000138160	KIF11	3832	-1.056	-1.173	-1.1145	TCCCCGTAACAAGAGAGGAG	TGTACGCCCTCCAAGAGAAT
1554	ENSG00000156222	SLC28A1	9154	-0.384	-1.843	-1.1135	TGCTGAAGTGACAAGGCAAG	CAGAGAGCCCAGTGCAGAG
1553	ENSG00000155366	RHOC	389	-0.422	-1.805	-1.1135	ACAGCAGGGCAGGAAGACTA	TTGGGGATCTCAGAGAATGG
1552	ENSG00000184909	C1orf49	84066	-1.248	-0.979	-1.1135	AGAAGGGCGGTTTACCAAAG	AGGTCCCACAGTGATGAAGG
1555	ENSG00000048392	RRM2B	50484	-2.086	-0.14	-1.113	GGATCTCCCTCACTGGAACA	TCAGGCAAGCAAAGTCACAG
1556	ENSG00000090975	PITPNM2	57605	-0.655	-1.569	-1.112	TATCGGATTCCTCTGCCAAT	GGCACAGGGTCTTTGACAAT
1557	ENSG00000186654	PRR5	23779,55615,553158	-1.41	-0.814	-1.112	GCTCTAACCTGGCCTGTGTC	GTGTGGGAGGTAGCTCGAAA
1559	ENSG00000182809	CRIP2	1397	-0.522	-1.701	-1.1115	GTACTTCGCCGAGAAGGTGA	ATTCCATAGCAGGGCTTGTG
1560	ENSG00000137221	TJAP1	93643	-0.762	-1.461	-1.1115	AGGACAAGCTGCACACACTG	TGCACAAAGACATCCTCAGC
1558	ENSG00000137269	LRRC1	55227	-1.302	-0.921	-1.1115	TTGAGCAACTTGAATGCAGA	AATCGGATCGCACTGACTCT
1561	ENSG00000168243	GNG4	2786	-1.129	-1.092	-1.1105	CACAGGGGCAGTAGAATGAAA	TGCCACGAAGAAAACAGATG
1564	ENSG00000110931	CAMKK2	10645	-1.324	-0.896	-1.11	CATGGTGTTCGAACTGGTCA	AATTCCAGGGCCTGACTCTT
1563	ENSG00000105829	BET1	10282	-0.683	-1.537	-1.11	CTCCTGGCAACTATGGGAAC	TTTCAATGGAAAATGCCACA
1562	ENSG00000035928	RFC1	5981	-1.297	-0.923	-1.11	CCAGATCCGGAGTAAGCAAA	ATGGAGTAAGGTGGGCTTCC
1565	ENSG00000105552	BCAT2	587	-2.272	0.052	-1.11	GCAGCTGGAAATGACACAGA	GGCAGAGAATGACGAACAGG
1566	ENSG00000118050	n.a.	n.a.	-0.866	-1.353	-1.1095	CCGGAATCTGAGATGATGCT	CAGAAAGGTTCCTTGGGTCA
1568	ENSG00000188667	n.a.	n.a.	-0.461	-1.757	-1.109	CGGGATGACAGTTGGTCAGT	CTCGTACAGGCAGGCAAAA
1567	ENSG00000177807	KCNJ10	3766	-0.796	-1.422	-1.109	GCGGAGAGTCCTGACAAAAG	CAATCTTCGCCAGGAAGGTA
1569	ENSG00000197110	IL28B	282617	-1.286	-0.931	-1.1085	CTAGACATGACCGGGGACTG	AGCTGGGAGAGGATATGGTG
1571	ENSG00000062282	DGAT2	84649	-1.23	-0.986	-1.108	GTCACAGTGGGTCCGAAACT	TAGATGGGAACCAGGTCAGC
1570	ENSG00000110324	IL10RA	3587	-1.275	-0.941	-1.108	ATGACCTTACCGCAGTGACC	ATACTGCCTGGTGAGGGAGA
1572	ENSG00000161277	THAP8	199745	-1.189	-1.026	-1.1075	TAAGCGTCATGGGGTCTTTC	CTGCAGTACTTGGGCATGG
1573	ENSG00000063241	ISOC2	79763	-1.319	-0.895	-1.107	GACCCTGGACCTCCTAGACC	CCACCCAGTTTCCAGGAGT
1574	ENSG00000170113	NIPA1	123606	-1.466	-0.748	-1.107	TGGATGGTTCGAGGAATAGG	TGCCAGAGTTCAAGACAACAA
1576	ENSG00000136573	BLK	640	-0.953	-1.26	-1.1065	AGGAGCCTGCTCCACTGTAA	AGCAAGAAGCTGCCTCTCAG
1575	ENSG00000186400	OR10X1	128367	-1.463	-0.75	-1.1065	GGGTCTAACTTGGGTGGACA	TGAAGGGATCCTGAGGACAG
1578	ENSG00000132786	n.a.	n.a.	-0.775	-1.437	-1.106	GGACTTCGCAAGTCAGGTGT	TGTCCCTCATCACCTTCACA
1577	ENSG00000169188	APEX2	27301	-0.764	-1.448	-1.106	TCCAGGAAACCAAAGTGACC	ATTCCAGGTTGACTGCATCC
1579	ENSG00000146112	KIAA1949	170954	-0.955	-1.257	-1.106	TCTTCCCTGGTTTCCCTTCT	GAGGGGCTAAGGATGAGGAC
1580	ENSG00000159228	CBR1	873	-0.987	-1.223	-1.105	AAGAAGGGAGTGCACCAGAA	CTGAGTGCGTAGGTTGCTCA
1581	ENSG00000167693	NXN	64359	-0.368	-1.841	-1.1045	GTGATGGACGTGGAGGAGAT	CAGAAACAAGGCACCACAGA
1582	ENSG00000111321	LTBR	4055	-1.395	-0.814	-1.1045	GCCGAGAATTCCTACAACGA	GAGCAGAAAGAAGGCCAGTG
1583	ENSG00000010379	SLC6A13	6540	-0.238	-1.97	-1.104	TGGCATTCCTGTCTTCCTTC	GCCGTGAAGTACACCACCTT
1585	ENSG00000168487	BMP1	649	-1.46	-0.748	-1.104	GGCACACAGCTCGTAAGTCC	CACAATGCCGAACTTGTCAC
1584	ENSG00000189144	ZNF573	126231	-0.908	-1.299	-1.1035	GTGGGAAGCCGTATGAATGT	AGGTCTTCCCACATTGCTTG
1586	ENSG00000197901	SLC22A6	9356	-1.504	-0.703	-1.1035	GGCACCTTGATTGGCTATGT	GCACCAAAGATCACCTGGAT
1587	ENSG00000112304	THEM2	55856	-0.527	-1.679	-1.103	CTTCCGAAGTTCGTTCTTGC	ATTTTCCTGTGGCCTTGTTG
1588	ENSG00000157873	TNFRSF14	8764	-1.105	-1.1	-1.1025	GGAACTGCTCCAGGACAGAG	ATGACTGTGGCCTCACCTTC
1589	ENSG00000160685	ZBTB7B	51043	-1.172	-1.033	-1.1025	CCCTATGAGGGTGAGGAAGA	TGCATGTGGTTCTTGAGGTC
1590	ENSG00000136279	DBNL	28988	-1.177	-1.027	-1.102	GCCAACTACGTGGAGCTCAT	CACTGTTCCCAAGGGTCATT
1591	ENSG00000176087	SLC35A4	113829	-0.046	-2.157	-1.1015	AAGGACCTGGCATTTCTCAA	AAGAGTAAGGGGCTGGTGGT
1592	ENSG00000177769	n.a.	n.a.	-1.665	-0.537	-1.101	ACAAGTGCCTCCTGCTCACT	GGTGTCTGCCTTGACCACTT
1593	ENSG00000184465	WDR27	253769	-0.988	-1.213	-1.1005	CAAGTGCTCTGGGAAAAGGA	GAGGTCGGTAGGACACAGGA
1594	ENSG00000120885	CLU	1191	-1.101	-1.1	-1.1005	GACTCTGCTGCTGTTTGTGG	GTAGAAGGGCGAGCTCTGGT
1595	ENSG00000174547	MRPL11	65003	n.a.	-1.1	-1.1	GCGTTTCCATCAACCAGTTT	GTACATCCTGCAGGGCAAAT
1598	ENSG00000143575	HAX1	10456	-0.495	-1.704	-1.0995	CACTTCGGGACTCAATGCTT	CAGGATGGAAAAGGCATCAT
1596	ENSG00000128815	WDFY4	57705	-1.145	-1.054	-1.0995	ATCGCCCTGGAGATCTTCTT	TGAGGTGTAGTCTGCGAGGA
1597	ENSG00000094796	KRT31	3881	-1.404	-0.795	-1.0995	GGCAGAACCAGGAGTACCAG	CTGGGTGAGCATAGGAAGGA
1601	ENSG00000164805	n.a.	n.a.	-1.114	-1.084	-1.099	AACCAGCCCCACATCTACTG	GTTCCCTTCCTCCAGGGTAG
1599	ENSG00000177963	RIC8A	60626	-0.546	-1.652	-1.099	AGCGTTTGCACAAGACACAC	ATGCCCTCCATAGGGTTAGG
1600	ENSG00000141456	PELP1	27043	-1.283	-0.915	-1.099	CACACCACCCCCTATAGCC	TTCCTCCTCCTCATCCTCCT
1605	ENSG00000149476	DAK	26007	-0.876	-1.321	-1.0985	AGATCGCAAAGCAGGTGAAC	GCAGGAGGGTGAGAGAAATG
1602	ENSG00000111960	n.a.	n.a.	-0.933	-1.264	-1.0985	TGTGGGTCGTCCCTCTATTC	CCATGCCTCATCCTCATCTT
1603	ENSG00000138622	HCN4	10021	-1.292	-0.905	-1.0985	TATCATTCCTGTGGGCATCA	AGCATGGGTACCAGGAACTG
1606	ENSG00000149483	TMEM138	51524	-1.539	-0.658	-1.0985	CATCCAGCTTGTGCTCTTCA	CATGCATAGGGCCAACTCTC
1604	ENSG00000171466	ZNF562	54811	-1.941	-0.256	-1.0985	TTGAGGCACATCTCACCATC	TTTCAAGATGCACAGCAAGG
1607	ENSG00000114166	KAT2B	8850	-0.608	-1.588	-1.098	GCCCTAGCTGCTCATGTTTC	CAAACACCTGTGTGGTTTCG
1609	ENSG00000047056	WDR37	22884	n.a.	-1.098	-1.098	CCAGCCTGTTGCTGACACTA	GTCACAGTGTCCGTGTGTCC
1610	ENSG00000187051	RPS19BP1	91582	-0.214	-1.981	-1.0975	GTGGCCAAGACCAAGAAGAA	GGAATTAGCCTTGCTCCACA
1608	ENSG00000155269	GPR78	27201	-0.664	-1.531	-1.0975	GGACACCGTCACCATGAAG	GTGTCCACAGAGCCGTTGT
1611	ENSG00000076924	XAB2	56949	-1.079	-1.115	-1.097	ACTGAAGGTCTGGTCCATGC	GCCCGCTTGATGTAGATGTT
1612	ENSG00000100324	MAP3K7IP1	10454	-2.378	0.184	-1.097	GGAGAGGAGCTTCCTGGAGT	AGGTCAATGTCCGTGTAGCC
1613	ENSG00000161921	CXCL16	58191	-0.753	-1.439	-1.096	ATGCTTACTCGGGGATTGTG	AAGCTTCCATTCTTGGCTCA
1614	ENSG00000118960	HS1BP3	64342	-0.777	-1.415	-1.096	CTCCAGGCGACTTCAGAATG	TCTGACTGTCTGTGCCATCC
1618	ENSG00000186814	ZNF397OS	100101467	-2.112	-0.079	-1.0955	ATGCTGCAGGGAACAAAATC	TCCCACATTCTCCACATTCA
1616	ENSG00000185061	ABCC6P2	n.a.	-0.621	-1.57	-1.0955	AGCCTGTGCTTCCTGAGAAC	TGTTTTGGAAAATGCCAGGT
1617	ENSG00000115648	MLPH	79083	-1.303	-0.888	-1.0955	CCCAGCATGTCTTGGAAGTT	GGTCGCTGTCTCCACTTCTC
1615	ENSG00000160584	AP006216.9	23387	-1.378	-0.813	-1.0955	GATCTGCAAGCACAAGTGGA	TCACCCTCATCACTGTCCAA
1620	ENSG00000112576	CCND3	896	-0.535	-1.655	-1.095	TGATTTCCTGGCCTTCATTC	TTTGTGAAGGGGGAACAGAC
1619	ENSG00000137285	TUBB2B	347733	-1.553	-0.637	-1.095	CAGTGATGAGCATGGGATTG	GTCATACAGGGCCTCGTTGT
1621	ENSG00000196753	n.a.	n.a.	-0.62	-1.569	-1.0945	GGCGAGTCTATCCTGAGGTG	TGTTTCATCCTGCAAAGCTG
1624	ENSG00000163795	ZNF513	130557	-0.98	-1.207	-1.0935	CCAGATTTGAGCCTCCATGT	CTGGTGCCGTTTCAGGTTAT
1622	ENSG00000088827	SIGLEC1	6614	-0.41	-1.777	-1.0935	AGAGCGAGATTCACCTCCAA	TATCAGCCCTAGTGGCCAAG
1623	ENSG00000184390	n.a.	n.a.	-1.734	-0.453	-1.0935	CGGAAGAGCTGGAGAGATGA	GAACCGTGGAAAGTTTGGAA
1627	ENSG00000176919	C8G	733	-0.807	-1.379	-1.093	GCCATGGCTGTCAGTACCTT	AGGTACCACTCCACCCACTG
1626	ENSG00000064419	TNPO3	23534	-1.364	-0.822	-1.093	CTTGCCCTACAGATGCCTTC	GCATACACAGTCCGAAGCAG
1625	ENSG00000104537	ANXA13	312	-1.093	n.a.	-1.093	GCACGAGGACCAATAAGGAA	GCACCCTTCATCGACTTGTA
1628	ENSG00000110492	MDK	4192	-0.657	-1.527	-1.092	CCTGCAACTGGAAGAAGGAG	AGCTTCCCAGAATCCCTTGT
1630	ENSG00000101255	TRIB3	57761	-0.289	-1.894	-1.0915	TCCAGAAACGAGCTCGAAGT	TTCTCCAGCACCAGCTTCTT
1629	ENSG00000149932	TMEM219	124446	-1.187	-0.996	-1.0915	ATGGGACAGTCACAGGGAAG	AAGGCCACAGAAGAGAAGCA
1633	ENSG00000180353	HCLS1	3059	-1.059	-1.122	-1.0905	CATGGCCACTTTGGACTCTT	CACAATGAGGCAAACCACAC
1634	ENSG00000142185	TRPM2	7226	-1.225	-0.956	-1.0905	AAGATGCTGGAAGTGCTGGT	GGGAACGTCTATGGACTGGA
1632	ENSG00000160867	FGFR4	2264	-1.336	-0.845	-1.0905	CAAAGACAACGCCTCTGACA	GCCGTTGCTGGTTTTCTTAT
1631	ENSG00000099795	NDUFB7	4713	-1.668	-0.513	-1.0905	CCGGGTAGGAGCTAGGTGAC	GGGCCTGAAGGCTTTTATTT
1637	ENSG00000137486	ARRB1	408	-1.098	-1.082	-1.09	GAGCACGCTTACCCTTTCAC	GGCAACAGGGCACTTGTACT
1638	ENSG00000101236	RNF24	11237	-1.07	-1.109	-1.0895	TGGGTCTTGTGACAACCAAA	CAAGCGCATCTCATGTTTTC
1635	ENSG00000106355	LSM5	23658	-1.249	-0.93	-1.0895	CTGCTGCCCTTAGAGCTTGT	CTTTGTTCCACTGGCTACTGC
1636	ENSG00000171314	PGAM1	5223	-1.326	-0.853	-1.0895	GGGGTCTAACCGGTCTCAAT	TCTTCATCCCCCAGAAACTG
1639	ENSG00000109685	WHSC1	7468	-0.257	-1.922	-1.0895	CCCACCATACAAGCACATCA	GCTGGCAGCTGTGATTCAT
1640	ENSG00000121067	SPOP	8405	-1.379	-0.799	-1.089	TTTGCGAGTAAACCCCAAAG	ATAGCCTTGTGAGCCTGGAA
1641	ENSG00000136856	SLC2A8	29988	-1.514	-0.663	-1.0885	CATGCTGCTTCTCATGTGCT	GCTGAACACCATGACCACAC
1643	ENSG00000181191	PJA1	64219	-1.108	-1.068	-1.088	CTTCAGGAAGAGCAGGCATC	GCCATGATCTTCAGTGACCA
1642	ENSG00000187068	C3orf70	285382	-1.713	-0.463	-1.088	ATCAGCCTATGACCCCTGTG	TGTGTCCTCGTCACACGATT
1648	ENSG00000165283	STOML2	30968	-0.738	-1.437	-1.0875	AGGAGAGGCCAGTGCAGTT	CAGGGAAGCTAGAGCCAGAA
1645	ENSG00000135643	KCNMB4	27345	-0.794	-1.381	-1.0875	CTTCATCTTCGGCTTCTGCT	TACAAGCCTCCTTCCCCTTT
1647	ENSG00000100162	CENPM	79019	-1.015	-1.16	-1.0875	GGACTCGATGCTCAAAGAGG	GTCAAGCCCTGACTGGACAT
1644	ENSG00000183473	SSTR3	6753	-1.3	-0.875	-1.0875	CACCAGCATATTCTGCCTGA	TTGAAGCGGTAGGAGAGGAA
1646	ENSG00000099992	TBC1D10A	83874.7	-1.777	-0.398	-1.0875	ACAAATGGATGGCCAAGAAG	CGCACATGAACCATTCTGTC
1650	ENSG00000173146	n.a.	n.a.	-0.886	-1.287	-1.0865	GGAAAATGAAACGCTCCAGA	CCTGAGGAGCATCTCCCATA
1649	ENSG00000124383	MPHOSPH10	10199	-1.163	-1.01	-1.0865	CGGAAACGGATGAAGATGAT	CATCATCCCAAGCCTGATCT
1651	ENSG00000197019	SERTAD1	29950	-1.279	-0.893	-1.086	TGGCTGTCTACTGGACGATG	CAGAGAAGGAACAGCCCAAG
1653	ENSG00000109618	SEPSECS	51091	-0.975	-1.195	-1.085	CTCTTGGGTCCATGCAAACT	CCAAAGTCTGCTCCTTGACTG
1652	ENSG00000173457	PPP1R14B	26472	-1.152	-1.018	-1.085	CGCCTCAACCTAGAGGAGTG	CCCCAAAAGTGGAAAACTGA
1654	ENSG00000161298	ZNF382	84911	-1.154	-1.016	-1.085	AGGCAAGAACCGTATTTCAA	ACAGGCTTTCTGCAGAGGAA
1655	ENSG00000167769	ACER1	125981	-0.951	-1.217	-1.084	GCTCCCGCTACATTTACGTT	GGTTTCACCTGGCATCTCAT
1658	ENSG00000105376	ICAM5	7087	-0.164	-2.002	-1.083	CAAGCTCTGGTCACACTGGA	TTCCCTCCAGCCAAGTAATG
1657	ENSG00000176788	BASP1	10409	-0.957	-1.209	-1.083	GAAGGGGAACCCAAAAAGAC	CCTTGATGGGACAACATCCT
1656	ENSG00000152056	AP1S3	130340	-1.317	-0.849	-1.083	TTGTGCATCGTTACGTGGAG	TGGGAGGCGTTGCTTATTTA
1659	ENSG00000083799	CYLD	1540	-1.208	-0.955	-1.0815	CAGCCTCCTCCTGTGAACTC	GCTGCAATGATGCAAACCTA
1661	ENSG00000124257	NEURL2	140825	-0.819	-1.343	-1.081	ATTGAGCAGTTTCGCATTCC	TGCACTGTGGGTCTTCACTC
1660	ENSG00000111906	HDDC2	51020	n.a.	-1.081	-1.081	AACCCAGCTCCTACCAGAGG	GCTTCCTGTTCTGTGGCTTC
1663	ENSG00000170775	GPR37	2861	-1.082	-1.08	-1.081	GGACTTCTCCTGCAAGATCG	TTTCTCTGCTTTGCGGATTT
1662	ENSG00000108349	CASC3	22794	-0.564	-1.597	-1.0805	TGAAGATGGCATTGAAGGTG	TCATCTTCCCGGAACTTGTC
1665	ENSG00000129951	AC006273.1	79948	-0.736	-1.425	-1.0805	CACGACTCGGTTTATCAGCA	CCTCTTCGTCCTCCTCCTCT
1664	ENSG00000109991	P2RX3	5024	-1.965	-0.196	-1.0805	CTTGCACGAGAAGGCTTACC	AAGTTGAAGAGGGGGAAACG
1667	ENSG00000174444	RPL4	6124	-1.08	n.a.	-1.08	GACCAAGGAAGCTGTTTTGC	TGGGCTTTTCAAGATTCTGC
1666	ENSG00000144015	TRIM43	129868	-0.897	-1.262	-1.0795	CAGCTTCTGTAGGCCCTGTC	AAGGCTGTTCTTCCCTCCTC
1669	ENSG00000163872	YEATS2	55689	-0.669	-1.489	-1.079	TGACCAGCGACTGATTGAAG	AGCATTCCGCTGTTCTGTTT
1668	ENSG00000159423	ALDH4A1	8659	-1.192	-0.966	-1.079	GTCCTTTGCCCGTATCAAGA	GGCTTGTCATTGGTTCCAGA
1670	ENSG00000160188	TSGA2	89765	-0.062	-2.095	-1.0785	CACAGGTACCAGGGCAAGTT	TGTTTCCCTCATCCATGTCA
1671	ENSG00000189037	DUSP21	63904	-0.889	-1.265	-1.077	CAGCCCTCCATCTACAGCTT	GTTACCTACCGGCGAGTTGA
1672	ENSG00000125144	MT1G	4495	-0.755	-1.397	-1.076	CCTTCTCGCTTGGGAACTCT	GGAATGTAGCAAAGGGGTCA
1673	ENSG00000189311	n.a.	n.a.	-1.167	-0.985	-1.076	GAAACCAGCCCTTGGAGAAT	GCCAAGAGCAGCAATTTAGG
1676	ENSG00000170876	TMEM43	79188	0.245	-2.394	-1.0745	AGCAAAAACTTCGACCGAGA	CCCAGGTCTTCATGGAGTTG
1674	ENSG00000197613	n.a.	n.a.	-0.751	-1.398	-1.0745	CATTTTCCTGCTTCGGACAT	ATCTGTCATGGGAAGGATGC
1675	ENSG00000135823	STX6	10228	-1.224	-0.925	-1.0745	TCCCTGGCTTACAGATGACC	TTCCACTGTCCCTCTGCTGT
1677	ENSG00000182994	n.a.	n.a.	-0.952	-1.193	-1.0725	GCACTTGGCGAAAGAGATTC	AATCTTGGCCTTGTGGATTG
1678	ENSG00000152555	n.a.	n.a.	-0.632	-1.512	-1.072	TCTCCATCTTCCTCGTCTGG	CTTCCTGGGAGACCACACTC
1679	ENSG00000015413	DPEP1	1800	-1.832	-0.311	-1.0715	CTCCATTGACAGCAGTTTGG	ACCCTTGGAACACCATCAAA
1681	ENSG00000188878	FBF1	85302	-1.074	-1.069	-1.0715	TCGAGAGTGCACACAGAAGC	CATCGACCTCTCGGTCCTT
1680	ENSG00000168658	VWA3B	200403	-1.071	n.a.	-1.071	CTCCTGGGGAAGGTGACATA	CCCTCAGGGTAAAGTGCAAA
1683	ENSG00000196099	OR6M1	390261	-0.824	-1.317	-1.0705	CATCCTGCTAGGCTTTCCTG	GAGCAGCATCGTCTGACAAA
1682	ENSG00000133216	EPHB2	2048	-1.042	-1.099	-1.0705	CCCACACCCAGTACACCTTC	CTCCTGGATGCTTGTCTGGT
1687	ENSG00000163884	KLF15	28999	-0.663	-1.477	-1.07	AGAACTTCTCGTCGCCAAAA	GATGGAGGTGGCTCTTGTGT
1688	ENSG00000006282	SPATA20	64847	-0.675	-1.465	-1.07	CTGCTGGAGGGAAAGGAAG	CATCCTCAGGAGGGAAATAGG
1684	ENSG00000137259	HIST1H2AB	n.a.	n.a.	-1.07	-1.07	CAAACAAGGCGGTAAAGCTC	TTTCCCTTGGCCTTATGATG
1686	ENSG00000125944	HNRNPR	10236	-1.368	-0.772	-1.07	CCACAGAAGGTGGCAGAAAG	GTTTACCAGGGCGAATTTCA
1685	ENSG00000106100	NOD1	10392	-1.373	-0.767	-1.07	TGGTGGCCAAGTGATTGTAA	AATGTGGGGGTGAGACTCTG
1689	ENSG00000163956	LRPAP1	4043	0.119	-2.257	-1.069	AGTTCCGCATGGAGAAGTTG	GCAGGACGTTGTACTCGTGA
1690	ENSG00000169696	ASPSCR1	79058.6	-0.993	-1.145	-1.069	TCGAGGTTGCAGGACTCTTT	TTGTGCTCTGCTTCTCCTGA
1691	ENSG00000146066	HIGD2A	192286	-1.054	-1.084	-1.069	GAGCCCCACTGTTTACAGGA	GGGGAGATGTGGCACAAATA
1692	ENSG00000196610	HLA-DQB2	n.a.	-1.154	-0.983	-1.0685	TATAACCGCGAGGAGTACGG	CTGGGGAGTTATTTCCAGCA
1693	ENSG00000105193	RPS16P10	6217.44	-0.455	-1.681	-1.068	TGCAGTCTGTGCAGGTCTTC	CACGATGGGCTTATCGGTAG
1694	ENSG00000188784	PLA2G2E	30814	-1.281	-0.855	-1.068	TGCTGCCTTTTATGCTCCTT	TCTTGTCACACTCGCAGGTC
1695	ENSG00000153395	AYTL2	79888	0.109	-2.244	-1.0675	TCGGGCTAAAACCAGAAAAG	TGCAAACCTGTGGAAGTCAG
1699	ENSG00000169297	NR0B1	190	-0.071	-2.064	-1.0675	CTTGCAGTTCGAGACTGTGG	ATGATGGGCCTGAAGAACAG
1696	ENSG00000092964	DPYSL2	1808	-1.699	-0.436	-1.0675	ACGAGCGATCGTCTTCTGAT	GGAATTTACCCCGTGATCCT
1700	ENSG00000179886	TIGD5	84948	-1.649	-0.486	-1.0675	AGCCCAGTGACCTTTCTCCT	GCTTCGCCACTGAGATGATT
1697	ENSG00000136634	IL10	3586	-2.077	-0.058	-1.0675	TGCCTTCAGCAGAGTGAAGA	GCCACCCTGATGTCTCAGTT
1698	ENSG00000010361	FUZ	80199	-0.897	-1.237	-1.067	ACTCTGATTACCGCCATGCT	CTCTCCACGTTGCGGATATT
1701	ENSG00000070444	MNT	4335	-0.277	-1.857	-1.067	GACTCGAAGGCCACCATTC	TCCAGTACGTCCATCCACTG
1704	ENSG00000074964	ARHGEF10L	55160	-0.795	-1.338	-1.0665	TCGTGCTCTAGGACCTGCAC	GCATCTCCCAGAGCTCCAAT
1702	ENSG00000100056	DGCR14	8220	-1.425	-0.708	-1.0665	ATGGAGACTTGGAACGGATG	TTGGCCTTGTACTTCCAGGT
1706	ENSG00000185346	n.a.	n.a.	-0.634	-1.498	-1.066	AACGTGGAGATGGAGGTCAG	TCAGTCTCCCTGGAAGTTGG
1703	ENSG00000141068	KSR1	8844	n.a.	-1.066	-1.066	ATGGATCCCCACAGATGGTA	GGAAGTTGAACCTGCTGTCC
1705	ENSG00000108753	HNF1B	6928	-1.494	-0.638	-1.066	TCCGACAATTCAACCAGACA	CAGCTTGTTTGGAGGAGAGG
1709	ENSG00000188971	AC114772.5	n.a.	-0.8	-1.331	-1.0655	TGTATCCAGACCCCTCCAGA	AATGGGGCTTTGGAGAAAAT
1708	ENSG00000132383	RPA1	6117	-0.465	-1.666	-1.0655	TGGTTGACGAAAGTGGTGAA	CACGGGCTGTCTAGAACCAT
1707	ENSG00000152782	PANK1	53354	-1.148	-0.983	-1.0655	CGTTCCCTCTGTTTCTGTCC	TCTGACACCTCAACCCATGA
1710	ENSG00000123131	PRDX4	10549	n.a.	-1.065	-1.065	CAGCTGTGATCGATGGAGAA	GGCAGACTTCTCCGTGTTTG
1713	ENSG00000170786	SDR16C5	195814	-0.302	-1.827	-1.0645	CATCACAGGTGCTGGAAGTG	AGATTCAGCAAACCCAAAGG
1715	ENSG00000179094	PER1	5187	-0.702	-1.427	-1.0645	GGCAAGGACTCAGAAGGAACT	AGATGGAGCAGTGGAACCAT
1711	ENSG00000133639	BTG1	694	-1.201	-0.928	-1.0645	TCACTGGTTCCCAGAAAAGC	TCCATAATCCATCCCCAAGA
1716	ENSG00000105392	CRX	1406	-1.53	-0.599	-1.0645	TCCCTATCAGGCCAGAGCTA	CCACTTTCTGAAGCCTGGAG
1712	ENSG00000177453	AC114947.1	167359	-1.573	-0.556	-1.0645	ACAGCTCACGGCTTAGAGGA	GCAGTGAACGTGGTAGCTGA
1717	ENSG00000188231	n.a.	n.a.	-0.724	-1.404	-1.064	GAAGTTCGGCTACCGAGAAA	GCGACTGTCTGTCGTGGTTA
1714	ENSG00000176532	PRR15	222171	-1.759	-0.369	-1.064	CGCCTCCTGGGTTATTTTCT	TGGAGAGATCAGGCTTCTGG
1718	ENSG00000085733	CTTN	2017	-0.509	-1.618	-1.0635	CTTGGGAAGGAAGGCAGTG	TAAAACCCGACCTCATTGCT
1719	ENSG00000105865	DUS4L	11062	-0.937	-1.187	-1.062	GCCAGAGCTTGTTCAAGACA	AGTCCCGAGTTCAAGAGCAA
1720	ENSG00000090447	TFAP4	7023	-1.012	-1.112	-1.062	GTGCCCTCTTTGCAACATTT	TTCTCGTCCTCCCAGATGTC
1722	ENSG00000087088	BAX	581	-0.039	-2.084	-1.0615	TTTGCTTCAGGGTTTCATCC	GGAGGAAGTCCAATGTCCAG
1721	ENSG00000114735	HEMK1	51409	-1.265	-0.858	-1.0615	ATCCACCTCGACATGACCTC	AGAGCATGGGGAAATCACAG
1723	ENSG00000177047	IFNW1	3467	-0.45	-1.672	-1.061	TAGCCCTGTTGGATCTCTGG	ACAACTTCCCAGGCACAGTC
1724	ENSG00000014919	COX15	1355	-1.35	-0.772	-1.061	GGCTGTTCCCTGTCATCAGT	CCCCACATTCGGTGTGAGTA
1725	ENSG00000133943	C14orf159	80017	-1.166	-0.954	-1.06	GGTTGTCTCACCCCAGAGAG	TGCGTCTTCAGAACACCTTG
1726	ENSG00000178814	OPLAH	26873	-1.62	-0.5	-1.06	CGACAGTAACAGCACCATCC	CCGGTGTGATAACAGTCAGGT
1727	ENSG00000136997	MYC	4609	-1.477	-0.642	-1.0595	CAGATCAGCAACAACCGAAA	CTCAGCCAAGGTTGTGAGGT
1728	ENSG00000147883	CDKN2B	1030	-1.539	-0.58	-1.0595	GTGGACTTGGCCGAGGAG	CACCAGGTCCAGTCAAGGAT
1729	ENSG00000162738	VANGL2	57216	-0.547	-1.571	-1.059	GCAGGAAGAGGAGCAGAAAA	GACTGCAGCCTCATGACAAA
1730	ENSG00000164270	HTR4	3360	n.a.	-1.059	-1.059	GCTCTGTGGTGGCCTTCTAC	GCTCATCATCACAGCAGAGG
1731	ENSG00000176136	MC5R	4161	-1.33	-0.787	-1.0585	TGATAGCAGACGCCTTTGTG	TTCTGAGGGCAAGAAAGCAT
1732	ENSG00000134962	KLB	152831	-1.931	-0.186	-1.0585	GGGGGTGGAAAAATGATACC	TCATCCCCTCTGGATAGTCG
1733	ENSG00000100385	IL2RB	3560	-0.726	-1.389	-1.0575	AATGGCACTTCCCAGTTCAC	CAAAGTAGTGGGAGGCTTGG
1734	ENSG00000099721	AMELY	266	-1.359	-0.756	-1.0575	CTCATCACCACATCCCAGTG	TGCTTGTGTCATCCCTGAAA
1735	ENSG00000196153	n.a.	n.a.	-1.453	-0.662	-1.0575	CCGACACCCAGAAACAGATT	TGCATCTCCTCACCTCCTTT
1736	ENSG00000115073	ACTR1B	10120	-0.145	-1.969	-1.057	GACCAAAAGCAGAGGAGCAC	ATGGAAGTCAACCCCTTCCT
1737	ENSG00000187688	TRPV2	51393	-1.648	-0.463	-1.0555	TCAGTGCTGGAGATCATTGC	GTAGATGCCTGTGTGCTGGA
1738	ENSG00000166295	C10orf104	119504	-0.52	-1.589	-1.0545	CCAAAGGAGCTGGAGAGATG	GCCCTACTTGGCTTGTGAAA
1740	ENSG00000156990	RPUSD3	285367	-0.983	-1.125	-1.054	GAAAACCAGGAGAGCTGACG	AGTACATGTGGTCCCCAAGC
1739	ENSG00000118007	STAG1	10274	-1.829	-0.279	-1.054	GCACCACAACTCACATCCAC	GGCATTCCAAATCCTGAATC
1741	ENSG00000133246	PRAM1	84106	-1.054	n.a.	-1.054	ACCGACAGCCTGAAGACATC	CTGGGCACGTAGCCATATTT
1742	ENSG00000134480	CCNH	902	-0.469	-1.638	-1.0535	GGACAGGAGAAGGCACTTGA	TGACATCGCTCCAACTTCTG
1743	ENSG00000002726	ABP1	26	-1.762	-0.343	-1.0525	AACTCTGGAGCAGACGCAGT	TCTGGTGGTAGATGCTGCTG
1744	ENSG00000105173	CCNE1	898	-1.141	-0.963	-1.052	ATCCTCCAAAGTTGCACCAG	TCCCCGTCTCCCTTATAACC
1745	ENSG00000123427	FAM119B	25895	-1.265	-0.838	-1.0515	GAACAAGCTCCTCTGCTTGG	GTTGTGTGCCAGGAACTGTG
1746	ENSG00000060656	PTPRU	10076	-1.271	-0.831	-1.051	ATCGTCCTGGATGTGATGCT	AGTCCCCATCAGTGGAGATG
1747	ENSG00000100429	HDAC10	83933	-1.327	-0.774	-1.0505	AGTGCCCTAGAGTCCATCCA	CCATCCAGCATCCCATCTAA
1748	ENSG00000176473	WDR25	79446	-1.101	-0.999	-1.05	AGGGCTGTTGGGAGAGGTAT	TGGAGATTTTGGCAGAGGTC
1749	ENSG00000174851	YIF1A	10897	-1.365	-0.734	-1.0495	CAATGTGGCTATGGCCTATG	CAGGTGAAAGGTGCTCAGGT
1750	ENSG00000107738	C10orf54	64115	-0.602	-1.496	-1.049	TTCAGCAGCTCTCGTTCTGA	GATTGCCCAAGACACCATTT
1751	ENSG00000152465	NMT2	9397	-0.904	-1.193	-1.0485	CGTACGCCAAGAACCGTATT	GGAAGATCCCTTCCAGGTTC
1752	ENSG00000189285	n.a.	n.a.	-1.605	-0.492	-1.0485	CTCCAGGGCTACAACTGCTC	AGATCTGGAAGATGGCATGG
1754	ENSG00000125991	ERGIC3	51614	-1.152	-0.944	-1.048	CTGCCTGCATTCAGATACCA	TGAGTCCAGCCACTGTGAAC
1753	ENSG00000184378	AC078802.14	84517	-1.379	-0.717	-1.048	GGCCTTGACCTCACCAACTA	AGAACCTCCCATCCACACTG
1761	ENSG00000179958	DCTPP1	79077	-0.746	-1.348	-1.047	AGCAGTGCTCTCCAAAATGG	ACAGGGAAACACGAGAATGG
1756	ENSG00000141499	WRAP53	55135	-0.569	-1.525	-1.047	CGAATCGAGGAGCAAGAACT	GGGCTGAGGACATCAGAGAA
1757	ENSG00000196229	n.a.	n.a.	-0.968	-1.126	-1.047	CACAAGGAGGCAACAAACCT	TAGATGACTGGGGAGGCTGT
1755	ENSG00000185972	CCIN	881	n.a.	-1.047	-1.047	AAGAGGCACCATGAAATTGG	AGTGGAAGTTGTCCCGAATG
1763	ENSG00000187607	ZNF286	57335.1	-1.214	-0.88	-1.047	GAAGGAGAAGGGCAAGAGGT	GTCAGCATGGAACCCTCAAT
1762	ENSG00000173237	C11orf86	254439	-1.603	-0.491	-1.047	CTCAGAGGGCCAGTGTCTTG	AAGATGGCGACAAAGCTCTC
1758	ENSG00000070190	DAPP1	27071	-1.724	-0.37	-1.047	TCTGTGAGGGCCAAAGATTC	GATCCGAATTGGTTCTGGTG
1759	ENSG00000170677	SOCS6	9306	-1.881	-0.213	-1.047	CATGTGCCTGTCGTTATTGG	AGGAGCAGAGTTCGGATCAA
1760	ENSG00000167580	AQP2	359	-1.047	n.a.	-1.047	GGTATTGGCACCCTGGTACA	CATCAAATTTGCCAGTGACG
1764	ENSG00000163673	DCLK3	85443	-0.696	-1.397	-1.0465	AAGGAGGACATGGTGGACAG	TCCACCTCCAGTCCATAACC
1765	ENSG00000100330	MTMR3	8897	-1.625	-0.468	-1.0465	ACGGGGATTTCTCCTCCTAA	TTTTAGCAGGTGGTCGGATT
1768	ENSG00000184207	PGP	283871	-0.279	-1.813	-1.046	GACCCGCACTTCAGCTACAT	CAAAAGGTCGGCTATGCTGT
1766	ENSG00000114867	EIF4G1	1981	-0.779	-1.313	-1.046	ACTGACACCCCAGATGTTCC	AGCAGTTTGACCACACAGTCA
1767	ENSG00000174059	CD34	947	-1.395	-0.697	-1.046	GGGCCACACAGAAACTCTTT	AACCGTCATTGAAACCAGGA
1769	ENSG00000143878	RHOB	388	-1.428	-0.664	-1.046	CCCACCGTCTTCGAGAACTA	CTCATAGCACCTTGCAGCAG
1770	ENSG00000159733	ZFYVE28	57732	-0.894	-1.197	-1.0455	AACCAGATCATGGATGAGTGC	AGTCAGGTACCCGAAGTCCA
1771	ENSG00000132746	ALDH3B2	222	-1.067	-1.023	-1.045	GAGCTCATCCTTTGCCAGAA	CATGACAATCTTGCCCACAC
1772	ENSG00000186451	SPATA12	353324	-1.095	-0.995	-1.045	AGTGCACTCAGAGCCAGGTT	TTGGGATACAGCGATGTCAA
1773	ENSG00000031081	AC092981.3-1	57514	-0.623	-1.465	-1.044	GGGACAGGATGTTCCATACG	CATCTCCATTGCAACCAGTG
1774	ENSG00000184687	n.a.	n.a.	-1.479	-0.608	-1.0435	TGGCAGCTACATGGGTGTTA	ATGCCAGAGACAAAGCAGGT
1776	ENSG00000119953	SMNDC1	10285	-0.913	-1.173	-1.043	GACGCTTGCAAGTTCAGACA	TCAGCAATTCCACAGGTTCC
1775	ENSG00000120694	HSPH1	10808	-1.104	-0.982	-1.043	CAGCACAGACCTTCCACTGA	TTTGGAGAAAGGAGCAGCAT
1777	ENSG00000071894	CPSF1	29894	-1.286	-0.8	-1.043	AGCCATCCAAGAAGAAAGCA	AACTCCTTCTCCTCGCCAGT
1779	ENSG00000154803	FLCN	201163	-0.955	-1.13	-1.0425	CTGGCCTGAGCAAGACCTAC	TTCACAACTGCAGCAAAAGG
1778	ENSG00000116337	AMPD2	271	-1.014	-1.071	-1.0425	GAGCTCCAAGTTCCAGATGC	CCTCCTTGATGATGTGAGCA
1780	ENSG00000083290	ULK2	9706	-0.755	-1.329	-1.042	GCCATCTGAATGTGATGCTG	GGCTGCAGACTGAACCATTT
1781	ENSG00000132153	DHX30	22907	-1.33	-0.754	-1.042	GGCAGCTGAATCCAGAGAGT	ATTCTCAGCCTCTGCTTTGC
1782	ENSG00000027075	PRKCH	5583	-0.567	-1.517	-1.042	GAACAGAGGTTCGGGATCAA	CGTCCTTCTTCAGCACCTTC
1783	ENSG00000103544	C16orf62	57020	-1.535	-0.548	-1.0415	CCGAGATGATGGAAAGGTGT	CTGAAGCTGGGGGTAGGAAT
1784	ENSG00000163113	OTUD7B	56957	-1.586	-0.496	-1.041	ACTGGTGGGTGAGTGTGGAT	TGAGCAAGGACAAAGACGTG
1785	ENSG00000080603	SRCAP	10847	-1.589	-0.493	-1.041	CCTTTGCACCGTATTGTGTG	TTCTCCTCCACTGTCCGTTC
1786	ENSG00000143217	PVRL4	81607	-0.36	-1.721	-1.0405	CTGCCATGTCAGCAATGAGT	GGTCCCATTCTCCTGAACAA
1788	ENSG00000081692	JMJD4	65094	-1.261	-0.82	-1.0405	AACCCCAAAGAGCACATGAC	GAAGCCATTGACCCAGTTGT
1790	ENSG00000160949	NFKBIL2	4796	-1.28	-0.801	-1.0405	AGTACCTCTGGGTCGGACAG	ATCAGGGATGAGGTCCTGTG
1787	ENSG00000158104	HPD	3242	-1.289	-0.792	-1.0405	ACACCCTGGTGGAGAAGATG	CGAATCGCTGTGATGATGTC
1789	ENSG00000102302	FGD1	2245	-1.373	-0.707	-1.04	GGGACCACTCAAGACCGATA	TTGGAGCGGTTGTTGTCATA
1791	ENSG00000143502	SUSD4	55061	-0.826	-1.253	-1.0395	ATGCCCTCTGTGGATGAAAG	CTTCGATTTGAGGGATACGG
1794	ENSG00000105612	DNASE2	1777	-0.651	-1.427	-1.039	TCAACAGCACAGAGGACCAC	GCTTCAGTGGCTGGGACTAC
1795	ENSG00000086991	NOX4	50507	-0.925	-1.153	-1.039	TTCCTCATGATCACAGCCTCT	TTGACCATTCGGATTTCCAT
1792	ENSG00000111975	n.a.	n.a.	-0.695	-1.383	-1.039	TATGCTGCTCACCCTGTCTG	ATGGATGAGGAGACCACTCG
1796	ENSG00000147571	CRH	1392	-1.079	-0.999	-1.039	CTGGGGAACCTCAACAAGAG	GAGCAGCGCTATGGTACAGA
1793	ENSG00000187678	SPRY4	81848	-1.251	-0.827	-1.039	TCCGTACAGTCCAGGACCTC	GAGATCCAATGGTGGGTGAC
1797	ENSG00000101882	NKAP	79576	0.068	-2.145	-1.0385	CGAACAAAGGCTGAAGAACC	TTTGTCATCCTTCCCTTTGG
1799	ENSG00000087510	TFAP2C	7022	-1.09	-0.987	-1.0385	CGCTCCTCAGCTCTACGTCT	CGTGGGTAATCAGGCTGAAA
1798	ENSG00000065243	PKN2	5586	-1.68	-0.396	-1.038	GAATCATCCCAAAAGCAGGA	TGACCTGTCCAGTTCCAGTG
1800	ENSG00000108641	B9D1	27077	-0.472	-1.602	-1.037	TACGCCGTCTGTTTCTAGGG	CGTAGGGGTTGGTGCTTTTA
1801	ENSG00000183397	C19orf71	100128569	-0.741	-1.333	-1.037	TACCTGTCCCTGGAGGGTTC	GACCCACTCCCGGTAGTTCT
1803	ENSG00000020181	GPR124	25960	-1.043	-1.031	-1.037	AGAAAGCTGCAGGTGGTGTT	GGTGATGAGGCCAGAGTGAT
1802	ENSG00000182852	n.a.	n.a.	-0.722	-1.351	-1.0365	AGTCCCACCGTCGTCTTCTA	GGGTAGCTTGTGAACCACCA
1804	ENSG00000177917	ARL6IP6	151188	-1.068	-1.005	-1.0365	GTTTACCCCTGGGCTCTGA	AACGATCAAGTAGGCGATGG
1806	ENSG00000138363	ATIC	471	-1.897	-0.176	-1.0365	CTCCGAGACCTCATCGTAGC	CGTTATCTCGGAAAGGGAAG
1805	ENSG00000197261	n.a.	n.a.	-0.508	-1.564	-1.036	GCACCCAGAGAGGTGGTTAG	AATTTCCTCGAGCCAAGTCC
1807	ENSG00000082898	XPO1	7514	-0.444	-1.627	-1.0355	GCAACTAAAGCAGATGCTTCCT	TCCTCTGGTTTAGCCATTCG
1809	ENSG00000113649	TCERG1	10915	-1.208	-0.862	-1.035	CCAATTCCACTTCCAGGTGT	CTCTTCTTTGGGCTCCTCCT
1808	ENSG00000167306	MYO5B	4645	-1.291	-0.779	-1.035	TGGATCCATGTGCTGACTTC	AACTAAATCTGCCATTTCTTAGGC
1810	ENSG00000186652	PRG2	5553	-1.38	-0.69	-1.035	GGGTGGGATAAAGCCAAGAT	GTAGCACCTCCGGCAAGTAA
1812	ENSG00000104921	FCER2	2208	-1.093	-0.976	-1.0345	CCGGAACGTCTCTCAAGTTT	CCATGTCGTCACAGGCATAC
1811	ENSG00000104983	CCDC61	729440	-1.497	-0.572	-1.0345	CCTGCAGGTGGACTACGTCT	TCCTTCAGTGACCGGATGAT
1815	ENSG00000108244	KRT23	25984	-0.911	-1.157	-1.034	GGATACAGGTCCCAGGGAAG	CTTCTCCAGGTGGGTTTTGA
1817	ENSG00000166508	MCM7	4176	-1.082	-0.986	-1.034	ATGGCACTGAAGGACTACGC	CATCATTAGCCGATGCTCAA
1814	ENSG00000167654	ATCAY	85300	-1.874	-0.194	-1.034	CGGCCTTACATGAAAGTGGT	GTCTGGGATCTGGACGTGTT
1813	ENSG00000157259	GATAD1	57798	-1.035	-1.033	-1.034	CGGCTGCTGAAAAGAAAGTC	TTCTCTGGTCTGGTGGGAAC
1816	ENSG00000165630	PRPF18	8559	-1.287	-0.78	-1.0335	CAGACCCATCCAAATGTGTG	CCACAACTTTCGGGTCAACT
1818	ENSG00000174339	OR2Y1	134083	-0.103	-1.963	-1.033	GTGTGTGGCTCAGCTCTTCA	TTTTCCCTCACGCTCAGAAT
1819	ENSG00000090266	NDUFB2	4708	-0.561	-1.505	-1.033	AGAACTGAGGCCCAGGAAAT	GAAATTCTCACCTGGCTCTTG
1820	ENSG00000006116	CACNG3	10368	-1.147	-0.919	-1.033	CTCTGGGTTTCTTTGCCTTG	GCAAAGGCTCCTACAGTGGT
1821	ENSG00000142102	ATHL1	80162	-1.247	-0.817	-1.032	TGCAGAGACCAGAGCTGAGA	AGGCTGGCAGTGAATGACTC
1822	ENSG00000163597	SNORD1C	n.a.	-1.953	-0.111	-1.032	AAAATTTTGAAGCAACCAGCTA	TGTTTCAAGAAGTCTGTTCTCCA
1823	ENSG00000105254	TBCB	1155	-1.679	-0.384	-1.0315	TCACCATCGCTGAGTTCAAG	AGCGGACACCAATCCAGTAG
1825	ENSG00000105053	VRK3	51231	-2.862	0.799	-1.0315	CAGTAAATCCAAGGGCCAGA	TGAGGGCTACAGCTGGTCTT
1824	ENSG00000179134	SAMD4B	55095	-0.437	-1.626	-1.0315	TATTGGGAGCAATGCAAACA	GGACTTGAGGACGCTCTGTC
1826	ENSG00000147862	NFIB	4781	0.504	-2.566	-1.031	GCAAAGATATTCGCCAGGAG	GGTTATGGGCGTTCTGGATA
1827	ENSG00000185803	GPR172A	79581	-1.208	-0.854	-1.031	GCCCTAGGTGGGAAAAGAAC	CCTTGACCCAGGAAGAATGA
1828	ENSG00000147416	ATP6V1B2	526	-0.753	-1.308	-1.0305	AGAAGTGGGCAAGTTCTGGA	CGGGCAGTTTCCATGTTTAC
1829	ENSG00000101386	n.a.	n.a.	-0.911	-1.15	-1.0305	AGCACTAGGTCTTCCCGTCA	CCCATTTGCAGGAGTAGAGC
1830	ENSG00000112977	DAP	1611	-1.212	-0.848	-1.03	TGTGTTCATCTCTGGGGTCA	GACGTCAGGTGACTGCTGAA
1831	ENSG00000175294	CATSPER1	117144	-0.509	-1.55	-1.0295	TGGCCTTGGACTCCATATTC	GGAAGCTATCCACCAGGACA
1834	ENSG00000138380	ALS2CR8	79800	-0.867	-1.192	-1.0295	CCTGCCTCACTTTGTCACCT	CCTGGTGAATTTCCTTCTGC
1833	ENSG00000163517	HDAC11	79885	-0.895	-1.164	-1.0295	GAGCTCAAGTGGTCCTTTGC	CCTGGAGGGATTTCTTGATG
1832	ENSG00000007944	MYLIP	29116	-1.473	-0.586	-1.0295	AGGCCACCTCTTGTGTTCC	ACGATGCTGTTCCCAGATTC
1836	ENSG00000187272	KRTAP9-8	83901	-0.128	-1.93	-1.029	CCCTTGCTGTCAGCCTACAT	GCTGGAAGCAAGTGGTCCT
1835	ENSG00000130414	NDUFA10	4705	-0.964	-1.094	-1.029	CGCTATGGAATGTGGCATTT	GCCTCCAGGAACACAAAGTC
1838	ENSG00000100804	PSMB5	5693	-0.893	-1.164	-1.0285	CCATACCTGCTAGGCACCAT	CCTCTCTTATCCCAGCCACA
1837	ENSG00000157884	CIB4	130106	-0.957	-1.1	-1.0285	ATCAGATGCACTGGGAGGAC	CAGCATCCCCAGAAGTGAAT
1840	ENSG00000177096	FAM109B	150368	-0.505	-1.55	-1.0275	CTGTGGGCTTGGTTGAAGA	TCCTTCTCTGGACCTCAGGA
1839	ENSG00000130612	CYP2G1P	n.a.	-0.989	-1.066	-1.0275	CGAATGGATAAGGCAGGAAA	CGGAAGTCTTGGCTTCTGTC
1843	ENSG00000119283	TRIM67	440730	0.134	-2.188	-1.027	AGCAGCACAAGGCACAACTA	CAGATCAAACTCCGCAGACA
1841	ENSG00000172899	n.a.	n.a.	n.a.	-1.027	-1.027	CACAGACCCTCTGGGGAGTA	TGGGAACGAGGGTCAGATAG
1844	ENSG00000126500	FLRT1	23769	-1.301	-0.753	-1.027	CCGCAGATATCCCTGATGAT	CGAGAGCTCTGTGAGGTTCTG
1845	ENSG00000168490	PHYHIP	9796	-0.477	-1.576	-1.0265	GGAGAAAGCTGAGCAGATCG	TGCAGGTCAGGAACTTGTTG
1842	ENSG00000186301	RP5-1182A14.3	n.a.	-0.863	-1.19	-1.0265	GATGTGGCAGATGCTGAAGA	AGTTGTCGTCCAGACCTTGG
1846	ENSG00000106948	AKNA	80709	-1.751	-0.302	-1.0265	GGAAGACAGCCTGCACCAG	TCCTTGGTGGTCTTGCTCTT
1847	ENSG00000148154	UGCG	7357	-0.746	-1.306	-1.026	TAGCAAGCTCCCAGGTGTCT	CTCTAAGGTGGCAGCAAAGC
1849	ENSG00000173950	C3orf21	152002	-0.843	-1.208	-1.0255	ACATCCGGGAGTTGTTTGAG	TAGGCCTCGAAGACGTCACT
1848	ENSG00000117505	DR1	1810	-1.247	-0.804	-1.0255	GAGGAGACACGAAGGTGGTT	AGCAGTTCACCACCAGCTCT
1850	ENSG00000164366	CCDC127	133957	-1.71	-0.34	-1.025	CACGCCATGATCTCAGAAAA	ATTCTGGCGTTTGTTGGTGT
1852	ENSG00000183908	LRRC55	219527	-1.073	-0.975	-1.024	TGGTCTCCATTGCTTCTGTG	CCTCCATAATGACGTGCTCA
1851	ENSG00000160055	C1orf91	56063	-1.431	-0.617	-1.024	GATGAGGCCCTGTGAAGAAG	GGTGTCTCCTCTGCCATGTT
1853	ENSG00000178363	CALML3	810	-0.851	-1.195	-1.023	AGCTGACTGAGGAGCAGGTC	AGAGAGGTGGGCTGAATCAA
1855	ENSG00000068308	OTUD5	55593	-0.969	-1.077	-1.023	CTGTCTCTTCCGGGCTGTAG	CCATGACTCCTCCGATGTTT
1859	ENSG00000006118	TMEM132A	54972	-0.245	-1.8	-1.0225	CGTGGCCATCTTCATCTTCT	CTCCTCAGGGTCCTTCAGC
1854	ENSG00000188573	FBLL1	n.a.	-0.357	-1.688	-1.0225	ATCCACATCAAGCCCAAGTC	GTTCTCCTGCTGCAACTTCC
1860	ENSG00000137804	NUSAP1	51203	-0.719	-1.326	-1.0225	AGCAACCAGGAAGAAGCTGA	TGACCCCTCCCTTATTGATG
1858	ENSG00000102053	ZC3H12B	340554	-0.924	-1.121	-1.0225	TATGGCCAGCATGCAGTATC	AGTGGGGGACTGACTGTTTG
1856	ENSG00000161996	WDR90	197335	-0.946	-1.099	-1.0225	CTCCAGGTGCACAGTGACAG	CAGGACATCCCAGAGGAAGA
1857	ENSG00000165669	RP11-319I23.3	63877	-1.446	-0.598	-1.022	CTGCTACCTCCTGGCCTAAA	TTTAACAGGCGGGTCAAATC
1862	ENSG00000185182	AC116165.8-1	n.a.	-1.175	-0.868	-1.0215	TGAGACAGCCACTTCTGGTG	GGAGGCAGAGATGGTACTGC
1861	ENSG00000132561	MATN2	4147	-1.953	-0.09	-1.0215	GATTCGTTTGTGTGCCAGTG	GGGGGAAATTGTCAAGGAAT
1864	ENSG00000091542	ALKBH5	54890	-1.608	-0.434	-1.021	TTCAAGCCTATTCGGGTGTC	GAGCCAGAGTTCCCAGGAG
1863	ENSG00000178372	CALML5	51806	-0.933	-1.109	-1.021	GAGGAGGCCCAGTACAAAAA	CCTCGCGAACTCCTCGTAG
1865	ENSG00000168002	POLR2G	5436	-0.876	-1.165	-1.0205	ACCTGCACAGGGAAGTATGG	CTCAGCTTACAAGCCCCAAG
1866	ENSG00000173033	n.a.	n.a.	-0.779	-1.261	-1.02	ATCCAAGCTGGAACTGTGCT	CCAGTTCTCGGATTCTCTGC
1868	ENSG00000125869	C20orf103	24141	-0.185	-1.854	-1.0195	GCTCAAATCATGGCAGAACA	TGACTGCGTCTTTGAAGTGG
1869	ENSG00000105443	CYTH2	9266	-0.562	-1.477	-1.0195	TGAGTACACCACGGACAAGG	TTTTCCAAACAGGGAACCAG
1870	ENSG00000137343	C6orf134	79969	-1.373	-0.666	-1.0195	GAGACCACAGTCCCACAGGT	AGGCTCCACAGCTACCTTCA
1867	ENSG00000103199	ZNF500	26048	-1.536	-0.503	-1.0195	GTGCCTAGTCTGTGGGAAGG	CAGGGATGAGAGTCCTGGAA
1871	ENSG00000141965	FEM1A	55527,652634	-1.078	-0.96	-1.019	CTTCAAGAAGACGGCCTACG	AGTCCCTCCGCCTCTAGGTA
1873	ENSG00000172046	USP19	10869	-1.041	-0.996	-1.0185	GCTTCACTGGCCTTGTCAAT	TGCTTCCTCAGCTACCACCT
1872	ENSG00000154316	TDH	n.a.	-1.077	-0.959	-1.018	CATCTATGGGGTGTCCAAGG	AGTGGACCAGGACACAGGAG
1874	ENSG00000135362	AC009656.11	79899	-1.497	-0.538	-1.0175	CATCACTGACAACCCTGACG	GCCAGGAGCATTGGATATGT
1875	ENSG00000168351	n.a.	n.a.	-1.004	-1.03	-1.017	AATCAATCTCCCAGCAGCAG	CCTCACAGGTCAACACCAGA
1876	ENSG00000180834	MAP6D1	79929	-1.113	-0.92	-1.0165	CGAGTCATCACAACCCACAC	AAAACTGAGAGACGGCCAGA
1878	ENSG00000104936	DMPK	1760	-0.567	-1.465	-1.016	CATGAACAAGTGGGACATGC	CAATCTCCGCCAGGTAGAAG
1879	ENSG00000008438	PGLYRP1	8993	-1.404	-0.628	-1.016	CCCTTACGCTATGTGGTGGT	GAGGTGGTAGAGCTGGTTGC
1877	ENSG00000075415	SLC25A3	5250	-1.778	-0.254	-1.016	CCCGCAGTGAATGTTCAAA	AAGTTCCTTTTGCACTTTCTTCAA
1881	ENSG00000166123	GPT2	84706	-1.016	-1.014	-1.015	CCTGGGGTCCTACAGTGCTA	CCTCATCAGCCAGGAGAAAG
1880	ENSG00000153944	MSI2	124540	n.a.	-1.015	-1.015	GCAGACCTCACCAGATAGCC	TTTCGGCTGAGCTTTCTTACA
1882	ENSG00000169258	GPRIN1	114787	-1.143	-0.886	-1.0145	ACTGAGCCCAAATCCTCAGA	GCAGATGTAGGAGCGACCTT
1883	ENSG00000162191	UBXN1	51035	-0.982	-1.046	-1.014	CGATGTGGACGAGCCTTTAG	GGGAGAAGAGGGAACAGGAC
1885	ENSG00000183598	HIST2H3D	n.a.	-0.787	-1.24	-1.0135	TGGCCCGTACTAAGCAGACT	GGATGTCCTTGGGCATGAT
1884	ENSG00000091428	RAPGEF4	11069	-0.98	-1.047	-1.0135	GGCACTAACGTGGGAGAAAC	TCTATGGTCGACGAGGCTCT
1886	ENSG00000186197	EDARADD	128178	-0.347	-1.679	-1.013	TGATAGCCCCAGACATACCC	GCTAACCAGGACAGGTGCAA
1888	ENSG00000112038	OPRM1	4988	-1.158	-0.868	-1.013	TCTTCAGCCATTGGTCTTCC	TGCATAAAGGACTGGGTTGA
1887	ENSG00000131982	n.a.	n.a.	-1.255	-0.771	-1.013	AGCTTGAAGAAATCCGCAAA	GGTCGCTTTTCCCCATATTT
1889	ENSG00000065308	TRAM2	9697	-1.353	-0.673	-1.013	CCCTAAGGACCTGGTCACAA	GTCTAGCCGTGTGGAAGAGG
1890	ENSG00000197891	SLC22A12	116085	-0.891	-1.134	-1.0125	GTTTTAGCCTCCTGGGGAAC	GACCATGGATGGTGGTTAGC
1892	ENSG00000116685	KIAA2013	90231	-1.127	-0.898	-1.0125	CTCTGGGCTCAGCTCTTCAG	TGGAACTGGAGGTGGTTCTC
1891	ENSG00000162198	n.a.	n.a.	-1.175	-0.849	-1.012	CATCATCTCCACGCTTGTGT	ATGTTTGAAGATGCGCACAG
1893	ENSG00000076706	MCAM	4162	-0.679	-1.344	-1.0115	GAGAGGAAGGTGTGGGTGAA	AGGATGCACACAATCACAGC
1896	ENSG00000131142	CCL25	6370	-0.851	-1.171	-1.011	GATAAAACCGTCGCCCTACA	GGACGGCAAGAAACAGAAAG
1894	ENSG00000117118	SDHB	6390	-1.494	-0.528	-1.011	TCATGCAGAGAAGGCATCTG	CCTTGTGCAGTTCATGATGG
1895	ENSG00000179007	n.a.	n.a.	-0.995	-1.027	-1.011	TGTCACCCTGACCATCTCTG	CAATGGGTCTCAGGATCCAC
1897	ENSG00000188203	n.a.	n.a.	-0.61	-1.411	-1.0105	ATCCCAGTTCCTGCAGACAT	TCTCTTGGGCTCCTGGTATG
1898	ENSG00000005436	C2orf3	6936	-1.02	-1.001	-1.0105	TCTGGTCAGGCCTAAAGCTC	AGGCACCAGCTTCTTCTCAA
1900	ENSG00000143620	n.a.	n.a.	-0.416	-1.604	-1.01	TTGGCCATGTTCAATTCTCA	TGTGTTTGTCTTGCCTCTGC
1901	ENSG00000175470	PPP2R2D	55844	-1.038	-0.982	-1.01	GTTTGAGTGTTGCTGGAACG	TAGCAGGTGCGTCACTGTTC
1899	ENSG00000176357	n.a.	n.a.	-1.181	-0.839	-1.01	GACAGTCACAGTTCGCTGGA	CGCTCTTGCTTTGACTGATG
1905	ENSG00000180598	TP53TG3	24150,653550,729264,729355	-0.822	-1.197	-1.0095	GAGCTAGGGCGGCTAGTTTC	TGAGAGGCCCGACCTAGATA
1902	ENSG00000184634	MED12	9968	-1.239	-0.78	-1.0095	AGCTCTTCAGCGACTTTTGC	TAGCCAGCGAGTCATGAAAA
1903	ENSG00000177239	MAN1B1	11253	-0.396	-1.622	-1.009	GCCTTTCTGCTTTTCTGTGG	GGGCACTTCTGCTCTTCTTG
1906	ENSG00000128928	IVD	3712	n.a.	-1.009	-1.009	ATGAAGCTCAAAGCGGAAAA	CTCACGTGCAGGTAGGGAAT
1904	ENSG00000142677	IL22RA1	58985	-1.014	-1.004	-1.009	ACCCCAGACACGGTCTACAG	TTCTCTCTGCTTCCCTCCAA
1907	ENSG00000105216	LSM14A	26065	-0.722	-1.295	-1.0085	ATCGACACCGAAAACTCCAC	AACCAACCGCACTACTTTGG
1908	ENSG00000106400	ZNHIT1	10467	-1.059	-0.957	-1.008	CTGCCTCAGTTTGATGACGA	TCCCTTGGTCCAGGAAGAG
1909	ENSG00000163736	PPBP	5473	-0.934	-1.081	-1.0075	CAGCAACTCACCCTCACTCA	TTGATTCTGGGAGCATCTGG
1910	ENSG00000114841	DNAH1	25981	-0.472	-1.543	-1.0075	CACAGGCAAAACTGAGACCA	CTGGCCTCATTAAAGCCAAA
1911	ENSG00000134258	VTCN1	79679	-0.685	-1.329	-1.007	GTTGACCAGGGAGCCAACT	ATTGGAGCCTTCTGCTTTTG
1912	ENSG00000184631	n.a.	n.a.	-1.323	-0.691	-1.007	CTTTCTGAAGCGCTTTCCAC	CACACGCTAATCCAGCAAGA
1915	ENSG00000181264	TMEM136	219902	-1.006	n.a.	-1.006	GGGTGCATCCTTTGTTTTTC	GGCTGACTTAACCCAATCCA
1913	ENSG00000179242	CDH4	1002	-1.008	-1.003	-1.0055	CCATGGAGGTCTTCAGCATT	CATATCTGTGGCCTGAACGA
1914	ENSG00000186152	n.a.	n.a.	-1.246	-0.765	-1.0055	CCTCAGGCGTGTCTAGGAAG	GGAGCTGTATGAGCCGTAGC
1916	ENSG00000169983	n.a.	n.a.	-0.747	-1.262	-1.0045	ACCAATGAGAGCCACAGTCC	CGTAGTCAGTGGTGGCAGAA
1917	ENSG00000124201	ZNFX1	57169	-1.014	-0.994	-1.004	AGGTTCTTCGGAAGGCTTGT	CAACATGGTCTTCTGCCTCA
1918	ENSG00000188265	n.a.	n.a.	-0.985	-1.022	-1.0035	AAGTCTCCAGAAGCCAAGGA	AAGGACTTGAGGCTGCGTAA
1919	ENSG00000121898	CPXM2	119587	-1.247	-0.76	-1.0035	CAGCAGTGGATTGAAGTGGA	CTGGTGGCTTTTTCCAATGT
1925	ENSG00000165349	SLC7A3	84889	0.777	-2.782	-1.0025	GCATTCATGGCATTCCTCTT	TCTGTGGCTGTCTCCAGATG
1924	ENSG00000174177	C16orf84	348180	-0.038	-1.967	-1.0025	TGTGGCAGGAGTCATCTTTG	CCCAGTCATGACCTTGGAGT
1920	ENSG00000156521	TYSND1	219743	-1.222	-0.783	-1.0025	GGCTGTGTTACCACCTTTGG	ATTGAAGCTCCAGGATGACG
1921	ENSG00000185905	C16orf54	283897	-1.242	-0.763	-1.0025	AGCTTTCTGGAAGCGTGAAG	GGTATTGGTGGCTTCGGTAA
1923	ENSG00000136522	MRPL47	57129	-1.362	-0.643	-1.0025	CCAAGTCCAGAGCGGTTAGA	CAGACTATTCAAGAAAAACAAAATGG
1926	ENSG00000103426	CORO7	79585	-1.401	-0.604	-1.0025	AGCTCGCATTGTCTGGGTAT	CTGGGAACACGTCATCCTG
1922	ENSG00000116852	KIF21B	23046	-1.435	-0.57	-1.0025	GCAGCTTCTCCCAGTCATTC	TGACCCCTGGCTCTGATTAC
1929	ENSG00000162407	PPAP2B	8613	-0.901	-1.103	-1.002	CCATCAGCCAGTCTTTCACA	CAGGGAGAGCGTCGTCTTAG
1927	ENSG00000180008	SOCS4	122809	-0.834	-1.169	-1.0015	TCCTGAAGTATGCTGAATGGAC	AATGGCTTTGGCTCATGAAT
1928	ENSG00000124098	C20orf108	116151	-0.969	-1.034	-1.0015	GTCTGCCCTGTCACGTAGTTG	CACCTAATGGTGTGAGGCATCT
1931	ENSG00000144233	AMMECR1L	83607	-1.746	-0.257	-1.0015	TGGAACTGCCAACACCACTA	ATATGTGGCTGTGCGTTTGA
1930	ENSG00000115953	n.a.	n.a.	0.011	-2.014	-1.0015	ATGTGGAACATTTGGTGCAA	TGCCACAGTCCAACAGTCTC
1932	ENSG00000163669	n.a.	n.a.	-1.001	n.a.	-1.001	TGCACCTCCTAAAGGCACTTAT	GGCCCATATTTCTGGAACCT
1934	ENSG00000136574	GATA4	2626	-1.084	-0.916	-1	AGCTCCTTCAGGCAGTGAGA	GGCCTCCTTCTTTGCTATCC
1933	ENSG00000167608	TMC4	147798	-1.304	-0.696	-1	TTTTTCCCCTTGGTCCTTCT	GCGTGGAGTCTTCTCCAGTT
1936	ENSG00000143125	PROK1	84432	-0.15	-1.849	-0.9995	AGGTCCCCTTCTTCAGGAAA	GCCATTTACCACCTCTCTGG
1935	ENSG00000113758	DBN1	1627	0.132	-2.131	-0.9995	AGAGGATGAGAACGCAGAGC	TGAAGAACTCCCTTGGGTTG
1937	ENSG00000157911	PEX10	5192	-0.409	-1.589	-0.999	AGAAGTTCCCTCCCCAGAAG	CGCACTCATTCAGTCCATTG
1938	ENSG00000105928	DFNA5	1687	-1.591	-0.407	-0.999	AAAGGTTTGGGATTGTGCAG	CCTCCCAGCTCTTTACATGC
1940	ENSG00000177854	TMEM187	8269	-0.786	-1.211	-0.9985	CACCACCTCGGCTACCTACT	TCGAGATCACAGCACTCCAC
1939	ENSG00000095370	SH2D3C	10044	-0.134	-1.863	-0.9985	ATGGGGAGAGGCTAAAGGAA	GGGTCTGCATCTCCTTGGTA
1944	ENSG00000116148	n.a.	n.a.	-0.287	-1.709	-0.998	TTCCCTGGGGAGTACCTGAT	AAGGCCACTTTCTCCTGTGA
1942	ENSG00000126062	TMEM115	11070	-0.757	-1.239	-0.998	TCCTCACCTACATGGCTTCC	GTAGCGCTTCACCGTCTTCT
1941	ENSG00000104964	AES	166	-0.881	-1.115	-0.998	ACCTACCCCAGCAACTCAAA	CACGGGTAGTGGGGTCAA
1943	ENSG00000120645	IQSEC3	440073,728056,731035,100134209	-0.981	-1.015	-0.998	TGGAGGACTTCATCCGAAAC	ATGCAGCACCTGCTTCTTCT
1945	ENSG00000145555	MYO10	4651	-1.333	-0.663	-0.998	ACAGCAGGATCAAAGGCAAT	TGCACCTCTCCAGCATAGTG
1947	ENSG00000063660	GPC1	2817	-0.858	-1.136	-0.997	GGGACACTGTGCAGTGAGAA	GTCAGTCCTTGGCCTCTGTC
1946	ENSG00000140955	ADAD2	161931	-1.176	-0.818	-0.997	AACCCACCCCTGACACCT	ACAACGCTCCTCAGATAGGG
1948	ENSG00000144381	HSPD1	3329	-0.462	-1.531	-0.9965	TCTGCAAACGGAGACAAAGA	CTTCTCCAAACACTGCACCA
1950	ENSG00000132283	n.a.	n.a.	-0.864	-1.129	-0.9965	GGGCTGAATGTGTTGGATCT	GCTGTCCAGAGCCTGCTTAG
1949	ENSG00000152942	RAD17	5884	-0.302	-1.69	-0.996	TCAAGCTTCCATATGTTTCCCTA	TCACCAGAACATCCCTGACA
1952	ENSG00000075856	SART3	9733	-1.296	-0.696	-0.996	GATCCTGCTCGCATTCAGTT	CAATCCTAGCCCAGTTCTGC
1951	ENSG00000141338	ABCA8	10351	-1.565	-0.427	-0.996	TCCCAGAAACAAGATGAGGAA	CTCCTTCTTTGCTGGCATTC
1953	ENSG00000197175	n.a.	n.a.	-0.996	n.a.	-0.996	AGATTATGCCTGTGCGGAAG	AGTCCTTCAGGGGATCAGGT
1955	ENSG00000149516	MS4A3	932	-0.885	-1.106	-0.9955	TGCTGATTCTCACCTTGCTG	CGCCTTCCTTCCTTAAACCT
1954	ENSG00000115165	PSCDBP	9595	-1.011	-0.98	-0.9955	ACCGGAGCATCAGTAACACC	GCAGGAACCTGCATCTTTGT
1956	ENSG00000158887	MPZ	4359	-1.164	-0.827	-0.9955	GGCTGTGCTGCTCTTCTCTT	ATCACAGCTCCCAGAACGAC
1957	ENSG00000110074	FOXRED1	55572	-0.6	-1.388	-0.994	TTTTCTCTGGACTGGGATGG	CACTTTCACGTTGCTCTCCA
1958	ENSG00000078549	ADCYAP1R1	117	-0.51	-1.477	-0.9935	ACTGCACACGCAACTTCATC	TTCCGAATAGTGGGATGAGC
1959	ENSG00000122679	RAMP3	10268	-1.004	-0.982	-0.993	AAGGTGGACGTCTGGAAGTG	ACTGGCCCTAGAATGAGCAA
1962	ENSG00000198294	n.a.	n.a.	-0.784	-1.201	-0.9925	CACAGTGTGAAATCGCTGCT	AAACTTTCCTGCAGGCTCAC
1960	ENSG00000172922	RNASEH2C	84153	-0.81	-1.175	-0.9925	GGGACTCGAAGTGTCGTTTC	TCCTTTATTGGGGTGATGGA
1961	ENSG00000198284	C3orf46	n.a.	-0.283	-1.702	-0.9925	AGGTGGTGGATGCAGAGACT	TTCCTCTCCCCTTGAATGTG
1965	ENSG00000006042	TMEM98	26022	-0.735	-1.249	-0.992	TTATCACCAACCCCCACATT	CGAAGGACTTCCAAATGCTC
1964	ENSG00000015592	STMN4	81551	-0.914	-1.07	-0.992	ATTGACCAGTGAAGCCATCC	AGTTCTACCGCCCTGGTTTT
1963	ENSG00000102098	SCML2	10389	-1.597	-0.387	-0.992	GGGATACCATGGGACAAACA	ATCGGCCAGGAGGATGTATT
1967	ENSG00000182156	ENPP7	339221	-0.87	-1.113	-0.9915	TCCTGGACTACGGACCAAAC	AGATTCTGTGTGCAGCATGG
1969	ENSG00000088451	TGDS	23483	-1.073	-0.91	-0.9915	TGCTGGTTTCATTGCATCAC	TGCAACATTTCCTGTTGTGC
1968	ENSG00000110237	ARHGEF17	9828	-1.314	-0.669	-0.9915	CATGCGTGAGAACAAGGAGA	ACTTGCTGGCTGTGTCAATG
1966	ENSG00000152428	MARS2	92935	-2.002	0.019	-0.9915	TTGCGAGTCTTTGGGACTTT	CCATCTTTCCCCTGAAGACA
1970	ENSG00000078967	UBE2D4	51619	-0.76	-1.221	-0.9905	TTCCTGACCATCCACTTTCC	CAAAGAGGTGGCACTGTCAA
1971	ENSG00000064545	TMEM161A	54929	-1.05	-0.931	-0.9905	ACGGCAGTTTGTTCCGATAC	AAAGGTGAGGCAGACAGAGC
1972	ENSG00000163013	FBXO41	150726	-0.517	-1.462	-0.9895	CAGATGATTGGTCGCTGTTG	GATAACACTCGGCCTCCAAA
1973	ENSG00000072163	LIMS2	55679	-1.591	-0.386	-0.9885	ATTGCCTTCTCCCTTCCTGT	AGGACTTGCTGGCTCAGTGT
1974	ENSG00000179943	FIZ1	84922	-1.503	-0.473	-0.988	CCCTCGCAAACATTAAGGAA	GGTGTCCAGTGTGTGAAACG
1975	ENSG00000161542	PRPSAP1	5635	-1.999	0.024	-0.9875	CTGAAGCCATTCGGAGAATC	TCCCTGGAGCTGAAACAACT
1976	ENSG00000167615	LENG8	114823	-0.302	-1.672	-0.987	GTGCCACTGGAAAGAGAAGC	CTCCCGATCTGCAAACTTGT
1977	ENSG00000116857	TMEM9	252839	-1.095	-0.879	-0.987	GCAGGAGCTGAAAGCCTCTA	CGAGCATCCTCATTCTCCTC
1979	ENSG00000129351	ILF3	3609	-1.528	-0.445	-0.9865	TGGCATTTATGACCCTTGTG	TGGGACACCAGCTTGTACTG
1980	ENSG00000144589	STK11IP	114790	-0.428	-1.545	-0.9865	TTTCCCCTTCAAATCCCTTC	AGCTCATTGCCTCGCAGTAT
1983	ENSG00000152076	CCDC74B	91409	-0.541	-1.432	-0.9865	GAAAGCCCACCACACTTAGG	AGCGGAAGTGTCAGGAAATG
1978	ENSG00000130684	ZNF337	26152	-1.407	-0.566	-0.9865	GGCCATTTAATTGCAAGGAT	TGGCATTCATAAGGCCTCTC
1981	ENSG00000125965	GDF5	8200	-1.527	-0.446	-0.9865	CCAGGACGATAAGACCGTGT	TGTAGATGCTCCTGCCACAG
1984	ENSG00000021826	CPS1	1373	-0.644	-1.328	-0.986	ACACTGGCTGCAGAATACCC	GAAGATGGAGCGATCCTCAG
1982	ENSG00000062524	LTK	4058	-0.83	-1.142	-0.986	GGGTCCCAGGAGACTTTTCT	CCAGGATGTACAGCGACTCC
1985	ENSG00000130513	GDF15	9518	-1.159	-0.811	-0.985	GAGGTGCAAGTGACCATGTG	CCGAGTCCCCAAGAAGGT
1989	ENSG00000081985	IL12RB2	3595	-0.212	-1.758	-0.985	CCAATTTCACAGCCAAGGTT	ATGTGCCGTTTCATGTACCA
1986	ENSG00000126467	TSKS	60385	-0.571	-1.399	-0.985	TCAGCAGTGTCTGTGGCTTC	CAGAGTGGCCATCTTCTCCT
1988	ENSG00000147465	STAR	6770	-0.909	-1.061	-0.985	AGCAGAAGGGTGTCATCAGG	GCCTCATCCCTGTTTTCTTG
1987	ENSG00000170846	n.a.	n.a.	-1.736	-0.234	-0.985	GGCTCAGGTCCCCTTCTATT	CTTTGGGCGTTGATTCTAGG
1990	ENSG00000156269	ARD1B	84779	-0.681	-1.288	-0.9845	TGAGCTGAGACGACAAATGG	TGGCAGGTCTCAAAGTTCCT
1991	ENSG00000188419	CHM	1121	-1.354	-0.615	-0.9845	TCGTCAGACATCAGCAGGAG	AAGTTGGGTATCCAGTTTGGTG
1993	ENSG00000166341	DCHS1	8642	-1.155	-0.812	-0.9835	TCGCATCTCTGTGTCAGACC	AGTGAGGCAGCCGTAGTGAT
1994	ENSG00000173465	SSSCA1	10534	-1.499	-0.468	-0.9835	CTCATGGGCGACTATCTGCT	GGTGCTAGAGCCCAGTTCAG
1992	ENSG00000122035	RASL11A	387496	-1.844	-0.123	-0.9835	ACTGCCCAAGGACATCAAAC	CGTGCATCTTGCTCACTTCT
1997	ENSG00000105369	CD79A	973	-0.473	-1.493	-0.983	GATGGCAGAACGAGAAGCTC	CCTGACAGATCAGGGAGGAG
1995	ENSG00000132109	TRIM21	6737	-1.305	-0.661	-0.983	AAGCAGGAGTTGGCTGAGAA	AAGTATCAGCCACGGATTGG
1996	ENSG00000168412	MTNR1A	4543	-1.97	0.004	-0.983	GATCCTGGTTCTCCAGGTCA	TTGGAAGTTTCCTCCACCAC
2000	ENSG00000101000	PROCR	10544	0.006	-1.971	-0.9825	TGGGAGCTCCTTTGTGAGTT	CTCCCCTCCCTCAAATCTTC
1999	ENSG00000100139	MICALL1	85377	-0.729	-1.236	-0.9825	GGAGGACATCCATGGAGAGA	CTTCTTGCCCTCAGGTTCAG
[truncated: 14,708 more rows]

## Sheet: NHEJ factors
No.	ENSG	Associated Gene Name	Description		EntrezGene ID		Cell Number Replicate 1	Cell Number Replicate 2	Average Cell Number	% GFP Positive Cells Replicate 1	% GFP Positive Cells Replicate 2	Average % GFP Positive Cells Replicate 2	z-score replicate 1	z-score replicate 2	Average z-score
16681	ENSG00000174405	LIG4	DNA ligase 4 (EC 6.5.1.1)(DNA ligase IV)(Polydeoxyribonucleotide synthase [ATP] 4) [Source:UniProtKB/Swiss-Prot;Acc:P49917]	#	3981	#	603	721	662	25.8706	25.6588	25.7647	2.52429	2.49063	2.50746
15955	ENSG00000152422	XRCC4	DNA repair protein XRCC4 (X-ray repair cross-complementing protein 4) [Source:UniProtKB/Swiss-Prot;Acc:Q13426]	#	7518	#	1735	1647	1691	19.4813	20.8865	20.1839	1.00789	1.82194	1.41492
15814	ENSG00000121031	PRKDC	DNA-dependent protein kinase catalytic subunit (DNA-PK catalytic subunit)(DNA-PKcs)(EC 2.7.11.1)(DNPK1)(p460) [Source:UniProtKB/Swiss-Prot;Acc:P78527]	#	5591,731751	#	1234	1319	1276.5	19.611	22.138	20.8745	1.00167	1.67884	1.34025
13831	ENSG00000196419	XRCC6	ATP-dependent DNA helicase 2 subunit 1 (ATP-dependent DNA helicase II 70 kDa subunit)(Lupus Ku autoantigen protein p70)(Ku70)(70 kDa subunit of Ku antigen)(Thyroid-lupus autoantigen)(TLAA)(CTC box-binding factor 75 kDa subunit)(CTCBF)(CTC75)(DNA repair pr	#	2547.39	#	1207	1239	1223	21.4582	22.5989	22.0286	0.548115	1.05259	0.800353
13694	ENSG00000152457	DCLRE1C	Protein artemis (EC 3.1.-.-)(DNA cross-link repair 1C protein)(hSNM1C)(SNM1-like protein)(A-SCID protein) [Source:UniProtKB/Swiss-Prot;Acc:Q96SD1]	#	64421	#	1050	1337	1193.5	19.3333	21.6156	20.4745	0.127453	1.42137	0.774409
11024	ENSG00000079246	XRCC5	ATP-dependent DNA helicase 2 subunit 2 (EC 3.6.1.-)(ATP-dependent DNA helicase II 80 kDa subunit)(Lupus Ku autoantigen protein p86)(86 kDa subunit of Ku antigen)(Ku86)(Ku80)(Thyroid-lupus autoantigen)(TLAA)(CTC box-binding factor 85 kDa subunit)(CTCBF)(CT	#	7520	#	677	724	700.5	20.0886	20.442	20.2653	0.182481	0.533467	0.357974
