# Supplementary material for: A Genome-Scale DNA Repair RNAi Screen Identifies SPG48 as a Novel Gene Associated with Hereditary Spastic Paraplegia
Source: PLoS Biol. 2010 Jun 29;8(6):e1000408. doi: 10.1371/journal.pbio.1000408 (PMC2893954; doi:10.1371/journal.pbio.1000408)
Supplement: Table S2 — Threading results. (0.02 MB XLS) [file pbio.1000408.s005.xls]

## Sheet: Supplementary Table 2
No.	ThdIdx (a)	z-comb (b)	z-pair (c)	z-surf (d)	% Id. (e)	pl (f)	fl (g)	Template	Protein / Fold
1	95.14	13.25	10.96	9.72	16.58	567	571	pdb2jkr.B.	AP-2 clathrin adaptor complex subunit beta-1 / Clathrin assemblies
2	72.8	14.08	12.49	9.56	12.43	700	860	pdb2bpt.A.	Importin beta-1 subunit / ARM repeat
3	70.49	12.69	11.72	8.65	14.15	714	937	pdb1wa5.C.	Importin alfa re-exporter / ARM repeat
4	68.41	13.6	12.24	8.65	15.45	505	508	pdb1jdh.A.	Beta-catenin / ARM repeat
5	68.18	13.12	10.42	10.59	13.2	750	1146	pdb1u6g.C.	TIP120 protein / ARM repeat
6	67.1	14.74	12.74	10.44	11.26	737	876	pdb1qgk.A.	Importin alfa-beta / ARM repeat
7	64.09	13.43	9.93	10.97	13.37	606	589	pdb1w63.E.	Clathrin adaptor protein 1 core / Clathrin assemblies
8	62.71	11.69	10.23	8.57	15.15	660	673	pdb1br2.D.	Myosin S1 / P-loop containing nucleoside triphosphate hydrolases (Family Motor proteins)
9	59.98	12.09	11.18	8.27	13.38	628	621	pdb2d7d.A.	UvrB system protein B / P-loop containing nucleoside triphosphate hydrolases (Family Tandem AAA-ATPase domain)
10	58.46	11.25	9.37	8.89	13.48	638	683	pdb2p6r.A.	Helicase Hel308 / P-loop containing nucleoside triphosphate hydrolases
(a) Threading index - calculated from z-comb and %Id.
(b) Normalized combination - calculated from z-pair and z-surf
(c) Residue-residue energy score
(d) Residue-solvent energy scores
(e) Sequence similarity
(f) Pathlength - the number of aligned residues in the sequence-to-structure alignment
(g) Foldlength - length of the template fold
