# Supplementary material for: A Genome-Scale DNA Repair RNAi Screen Identifies SPG48 as a Novel Gene Associated with Hereditary Spastic Paraplegia
Source: PLoS Biol. 2010 Jun 29;8(6):e1000408. doi: 10.1371/journal.pbio.1000408 (PMC2893954; doi:10.1371/journal.pbio.1000408)
Supplement: Table S6 — BAC clones and primer sequences used for BAC tagging. (0.02 MB XLS) [file pbio.1000408.s009.xls]

## Sheet: Supplementary Table 6
No.	Gene name	BAC ID	tag	Tagging primer forward (5'-3')	Tagging primer reverse (5'-3')
1	KIAA0415	RP23-384O15	LAP	TGCGCACGGTCAGCCGGCTGGTGGAGAAGGAGGCTGGCCTCCTGCCAGGTGATTATGATATTCCAACTACTG	CTGCCCAGGCTCTCACGCTGTAGCTACTGTTCAGGTGGTGACTGTCCCTTTCAGAAGAACTCGTCAAGAAG
2	KIAA0415	RP11-160E17	NFLAP	TGCAGCTCCTGGAGTTTCCGAGGTTCGTGCGCGTCTGGTGGCGGCGGCGTGATGGTGTCCAAGGGCGAGGAACTG	AGCTCCCCCGTACCTGGCCTGGTGGAGCAAACTCTCCGCTCCTGCCGAGAAGGCCCTGGGCAGGTCGTCGGTCAG
3	SPG11	RP11-264B5	LAP	TTCTGAAGGACCCTCAGACAGGTTGCTGTCTAAAGGACATGCTAGCAGGTGATTATGATATTCCAACTACTG	TCTGTCAGAATCTGCTAACAGTACAAGAAAACAGACACCTATGAAATCATTCAGAAGAACTCGTCAAGAAG
4	SPG15	RP23-406G4	LAP	GGCTTCTGACAAGCCACTCTCGAGGTGCCCATGGCTCAGGCTCCAGGAAGGATTATGATATTCCAACTACTG	CCTGTCGCCATAGTTCCCAGGCTATGGTTTCCAGGTTCTGCAGCCCAGGGTCAGAAGAACTCGTCAAGAAG
6	DKFZp761E198	RP11-58D3	LAP	CCGTGCTGCCCCTGGCGGGGGACTACCTCCGTGGGCTGGCGGCTGCTGTCGATTATGATATTCCAACTACTG	CTTGGCCCCCACAAGGGCCACAGTCCTGCCCCCACCTGGTCTCCCGGGGCTCAGAAGAACTCGTCAAGAAG
